# Supplementary material for: Nucleopalladation strategy towards regioselective N -alkylation of indoles with unactivated olefins
Source: Royal Society of Chemistry journal article supplement (doi:10.1039/d5cc06505d), 2025-12-03

- Supporting Information -

**Nucleopalladation strategy towards regioselective  
*N*-alkylation of indoles with unactivated olefins**

Shib Nath Saha, Niloy Ballav, Nitya Gupta and Mahiuddin Baidya\*

Department of Chemistry, Indian Institute of Technology Madras,  
Chennai 600 036, Tamil Nadu, India  
E-mail: [mbaidya@iitm.ac.in](mailto:mbaidya@iitm.ac.in)

## -Table of Contents-

|                                                                                                                             |     |
|-----------------------------------------------------------------------------------------------------------------------------|-----|
| 1. General information                                                                                                      | S3  |
| 2. Procedure for the synthesis of <i>N</i> -allylpicolinamide ( <b>1a</b> )                                                 | S4  |
| 3. Procedure for the synthesis of <i>N</i> -(quinolin-8-yl)but-3-enamide ( <b>1b</b> )                                      | S4  |
| 4. General procedure for the synthesis of <i>N</i> -alkylated indoles with<br><i>N</i> -allylpicolinamide (GP 1)            | S5  |
| 5. General procedure for the synthesis of <i>N</i> -alkylated indoles with<br><i>N</i> -(quinolin-8-yl)but-3-enamide (GP 2) | S5  |
| 6. Procedure for the scale-up synthesis of <i>N</i> -alkylated indoles with<br><i>N</i> -allylpicolinamide                  | S6  |
| 7. Procedure for the scale-up synthesis of <i>N</i> -alkylated indoles with<br><i>N</i> -(quinolin-8-yl)but-3-enamide       | S6  |
| 8. Procedure for the removal of the picolinamide directing group                                                            | S7  |
| 9. Procedure for the removal of the 8-aminoquinoline directing group                                                        | S7  |
| 10. Procedure for directed $sp^2$ and $sp^3$ C–H activation reaction                                                        | S8  |
| 11. H/D Exchange experiment                                                                                                 | S9  |
| 12. Characterization data of synthesized compounds                                                                          | S10 |
| 13. NMR spectra of synthesized compounds                                                                                    | S21 |

## 1. General information:

All non-aqueous reactions were carried out under an atmosphere of nitrogen in flame-dried glassware and were stirred using a magnetic stir plate. All reactions were carried out using commercial-grade solvent unless otherwise noted. CH<sub>3</sub>CN, DCE, and CH<sub>2</sub>Cl<sub>2</sub> were dried over calcium hydride. Dry THF was prepared by distilling over sodium ketyl.

All reactions were monitored by thin layer chromatography (TLC) on WhatmanPartisil® K6F TLC plates (silica gel 60 Å, 0.25 mm thickness) and visualized using a UV lamp (366 or 254 nm) or by use of one of the following visualization reagents: PMA: 10g phosphomolybdic acid/ 100 mL ethanol; KMnO<sub>4</sub>: 0.75g potassium permanganate, 5g K<sub>2</sub>CO<sub>3</sub>, / 100 mL water. Products were isolated by column chromatography (Merck silica gel 100-200µm). Yields refer to chromatographically and spectroscopically homogeneous materials unless noted otherwise. <sup>1</sup>H, <sup>13</sup>C, and <sup>19</sup>F NMR spectra were recorded on Bruker 400 or Bruker 500 MHz spectrometers. Chemical shift values (δ) are reported in ppm and calibrated to the residual solvent peak CDCl<sub>3</sub> δ = 7.2600 ppm for <sup>1</sup>H, δ = 77.16 for <sup>13</sup>C, DMSO-d<sub>6</sub> δ = 2.500 ppm for <sup>1</sup>H, δ = 39.500 ppm for <sup>13</sup>C; or calibrated to tetramethylsilane (δ = 0.00 ppm). All NMR spectra were recorded at ambient temperature (290 K) unless otherwise noted. <sup>1</sup>H NMR spectra are reported as follows: chemical shift (multiplicity, coupling constant, integration). The following abbreviations are used to indicate multiplicities: s, singlet; d, doublet; t, triplet; q, quartet; quint, quintet; sext, sextet; sept, septet; m, multiplet; dd, doublet of doublet; dt, doublet of triplet; dq, doublet of quartet; td, triplet of doublet; tt, triplet of triplet; dq, doublet of quartet; br, broad; app, apparent. Mass spectra were recorded by electrospray ionization (ESI) method on a Q-TOF Micro with lock spray source.

## 2. Procedure for the synthesis of *N*-allylpicolinamide (**1a**):

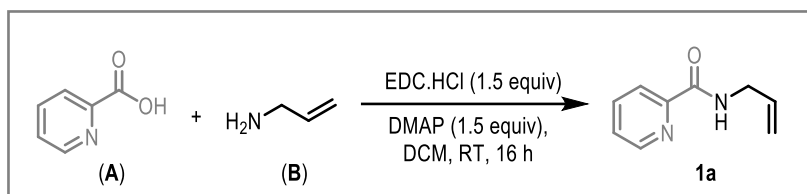

Picolinic acid (**A**) (1.0 equiv, 10 mmol) and 4-*N,N*-dimethylaminopyridine (DMAP, 1.5 equiv) were taken in a 50 mL round bottom flask under nitrogen. Anhydrous DCM (30 mL) was added and the mixture was cooled to 0 °C. The *N*-(3-dimethylaminopropyl)-*N*-ethylcarbodiimide hydrochloride salt (EDC·HCl, 1.5 equiv) was added under nitrogen and the mixture was stirred for 10 minutes at the same temperature. Then, allyl amine (**B**) (1.5 equiv) was added dropwise and the mixture was stirred at room temperature for overnight. Upon completion (TLC monitored), 10% aqueous NaHCO<sub>3</sub> solution (30 mL) was added to the reaction mixture and extracted with CH<sub>2</sub>Cl<sub>2</sub>. The combined extracts were washed with brine, dried over Na<sub>2</sub>SO<sub>4</sub>, and evaporated under reduced pressure. The crude residue was purified through column chromatography on silica gel using ethyl acetate in hexane to get the pure product **1a** (1.44 g, 89%).

## 3. Procedure for the synthesis of *N*-(quinolin-8-yl)but-3-enamide (**1b**):

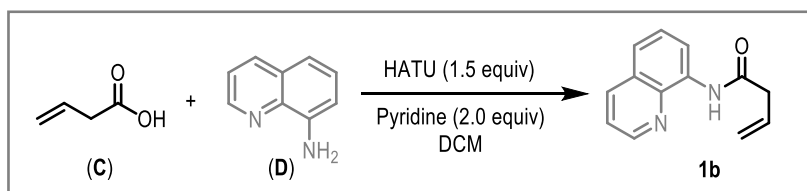

Vinyl acetic acid (**C**) (1.0 equiv, 10 mmol) was taken into a 100 mL RB flask containing dry DCM (20 mL) under nitrogen. 8-Aminoquinoline (**D**) (1.3 g, 9 mmol), pyridine (1.6 mL, 20 mmol), and HATU (5.7 g, 15 mmol) were added sequentially, and the reaction mixture was stirred at ambient temperature for 16 h. Next, 10% aqueous NaHCO<sub>3</sub> solution (30 mL) was added to the reaction mixture and extracted with CH<sub>2</sub>Cl<sub>2</sub>. The combined extracts were washed with brine, dried over Na<sub>2</sub>SO<sub>4</sub>, and evaporated under reduced pressure. The crude residue was purified through column chromatography on silica gel using ethyl acetate in hexane to get the pure product **1b** (1.80 g, 85%).

#### 4. General procedure for the synthesis of *N*-alkylated indoles with

##### *N*-allylpicolinamide (GP 1):

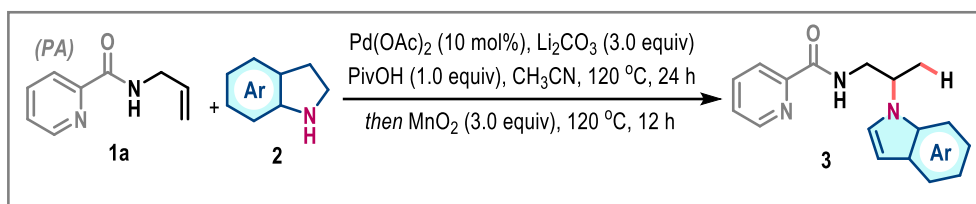

To an oven-dried screw cap reaction tube, *N*-allylpicolinamide **1a** (0.2 mmol), corresponding indoline derivatives **2** (1.1 equiv),  $\text{Pd}(\text{OAc})_2$  (10 mol%),  $\text{Li}_2\text{CO}_3$  (3.0 equiv) and  $\text{PivOH}$  (1.0 equiv) were taken. Acetonitrile (1 mL) was added, the reaction tube was capped, and placed it in a preheated oil bath at  $120^\circ\text{C}$  for 24 h. After 24 h,  $\text{MnO}_2$  (3.0 equiv) was added and further heated at  $120^\circ\text{C}$  for 12 h. After completion of the reaction (monitored by TLC), the crude mixture was diluted with DCM and concentrated on a rota vapour. The crude residue was purified through column chromatography on silica gel using ethyl acetate in hexane to get pure product **3**.

#### 5. General procedure for the synthesis of *N*-alkylated indoles with

##### *N*-(quinolin-8-yl)but-3-enamide (GP 2):

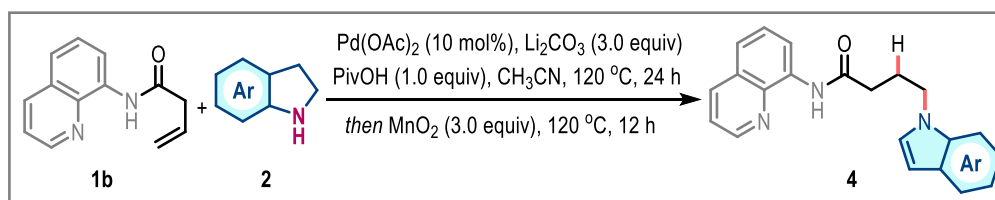

To an oven-dried screw cap reaction tube, *N*-(quinolin-8-yl)but-3-enamide **1b** (0.2 mmol), corresponding indoline derivatives **2** (1.1 equiv),  $\text{Pd}(\text{OAc})_2$  (10 mol%),  $\text{Li}_2\text{CO}_3$  (3.0 equiv) and  $\text{PivOH}$  (1.0 equiv) were taken. Acetonitrile (1 mL) was added, the reaction tube was capped, and placed it in a preheated oil bath at  $120^\circ\text{C}$  for 24 h. After 24 h,  $\text{MnO}_2$  (3.0 equiv) was added and further heated at  $120^\circ\text{C}$  for 12 h. After completion of the reaction (monitored by TLC), the crude mixture was diluted with DCM and concentrated on a rota vapour. The crude residue was purified through column chromatography on silica gel using ethyl acetate in hexane to get pure product **4**.

## 6. Procedure for the scale-up synthesis of compound 3a:

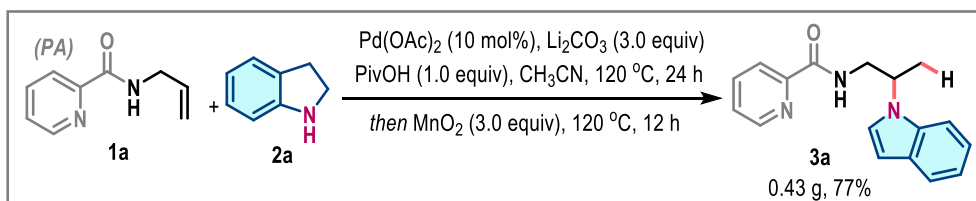

To an oven-dried screw cap reaction tube, *N*-allylpicolinamide **1a** (2.0 mmol), corresponding indoline **2a** (1.1 equiv),  $\text{Pd}(\text{OAc})_2$  (10 mol%),  $\text{Li}_2\text{CO}_3$  (3.0 equiv) and  $\text{PivOH}$  (1.0 equiv) were taken. Acetonitrile (5 mL) was added, the reaction tube was capped, and placed it in a preheated oil bath at  $120\text{ }^\circ\text{C}$  for 24 h. Then,  $\text{MnO}_2$  (3.0 equiv) was added and further heated at  $120\text{ }^\circ\text{C}$  for 12 h. After completion of the reaction (monitored by TLC), the crude mixture was diluted with DCM and concentrated on a rota vapour. The crude residue was purified through column chromatography on silica gel using ethyl acetate in hexane to get pure product **3a** (0.43 g, 77%).

## 7. Procedure for the scale-up synthesis of 4a:

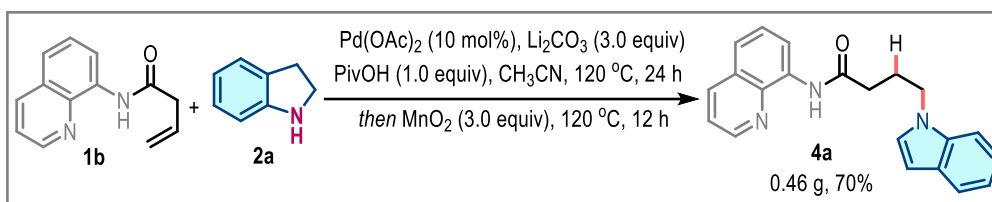

To an oven-dried screw cap reaction tube, *N*-(quinolin-8-yl)but-3-enamide **1b** (2.0 mmol), corresponding indoline **2a** (1.1 equiv),  $\text{Pd}(\text{OAc})_2$  (10 mol%),  $\text{Li}_2\text{CO}_3$  (3.0 equiv) and  $\text{PivOH}$  (1.0 equiv) were taken. Acetonitrile (5 mL) was added, the reaction tube was capped, and placed it in a preheated oil bath at  $120\text{ }^\circ\text{C}$  for 24 h. Then,  $\text{MnO}_2$  (3.0 equiv) was added and further heated at  $120\text{ }^\circ\text{C}$  for 12 h. After completion of the reaction (monitored by TLC), the crude mixture was diluted with DCM and concentrated on a rota vapour. The crude residue was purified through column chromatography on silica gel using ethyl acetate in hexane to get pure product **4a** (0.46 g, 70%).

## 8. Procedure for the removal of the picolinamide directing group:

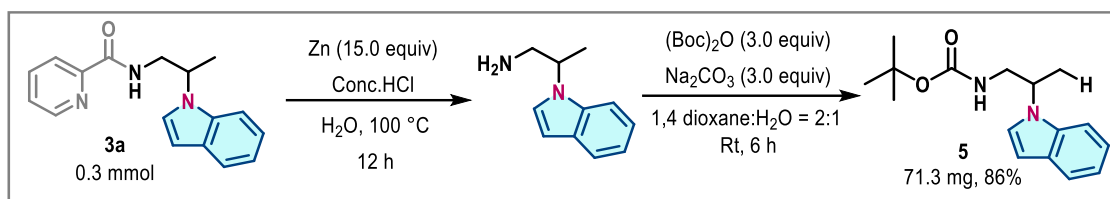

To a suspension of compound **3a** (0.3 mmol, 1.0 equiv) in H<sub>2</sub>O (6 mL) was added conc. HCl (0.7 mL) and the mixture was stirred for 5 minutes at room temperature. Zinc dust (292 mg, 4.5 mmol, 15 equiv) was then carefully added portion wise and the mixture was stirred at 100 °C for 12 h. Upon completion (TLC monitored), the reaction mixture was filtered through a celite plug. The filtrate was neutralized with 2M NaOH solution and then extracted with DCM. The volatiles were evaporated under reduced pressure and the crude residue was directly used for the next step.

The crude residue was taken in a 50 ml round bottom flask. Then, 1,4 dioxane (5.0 mL), Na<sub>2</sub>CO<sub>3</sub> (3.0 equiv), H<sub>2</sub>O (2.5 mL) and (Boc)<sub>2</sub>O (3.0 equiv) were added. The mixture was allowed to stirred at rt for 6 h. After completion of the reaction (TLC monitored), the crude reaction mixture was quenched with water and extracted with DCM. The crude residue was purified through column chromatography on silica gel using 10% ethyl acetate in hexane to get pure product **5** (71.3 mg, 86%).

## 9. Procedure for the removal of the 8-aminoquinoline directing group:

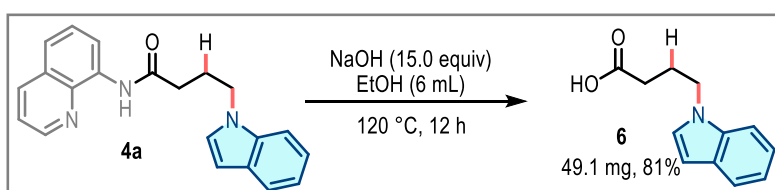

To a solution of compound **4a** (0.3 mmol, 1.0 equiv) in EtOH (6 mL) was added NaOH (15.0 equiv) and the mixture was placed in a preheated oil bath at 120 °C for 12 h. Upon completion (TLC monitored), the reaction mixture was acidified with HCl and extracted with ethyl acetate (20 ml x 3 times). The volatiles were evaporated under reduced pressure. The crude residue was purified through column chromatography on silica gel using 20% ethyl acetate in hexane to get pure product **6** (49.1 mg, 81%).

## 10. Procedure for directed $sp^2$ and $sp^3$ C–H activation reaction

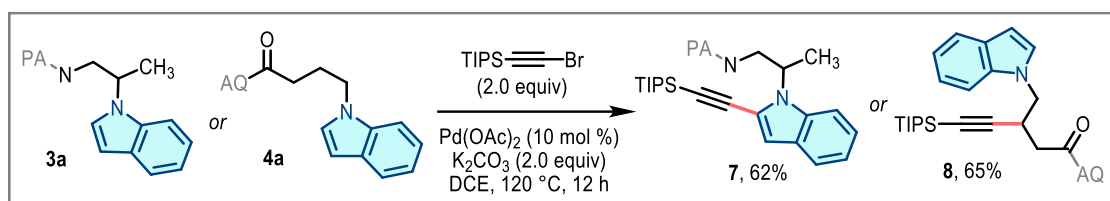

An oven-dried screw cap reaction tube equipped with a magnetic stirrer bar was charged with compound **3a** or **4a** (0.15 mmol, 1.0 equiv), (bromoethynyl)triisopropylsilane (2.0 equiv), Pd(OAc)<sub>2</sub> (10 mol %), and K<sub>2</sub>CO<sub>3</sub> (2.0 equiv). Then, DCE (1.5 mL, 1M) solvent was added. The reaction tube was capped and placed in a preheated oil bath at 120 °C for 12 h. After completion of the reaction (TLC monitored), the crude mixture was diluted with DCM and concentrated under reduced pressure. The crude residue was purified through column chromatography on silica gel using ethyl acetate in hexane to get pure product **7** or **8**.



## 11. H/D Exchange experiment:

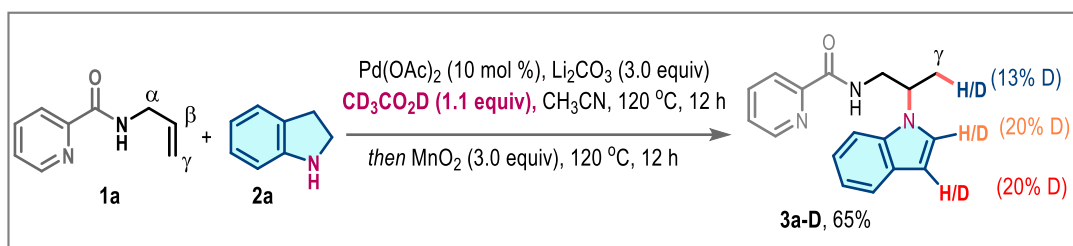

To an oven-dried screw cap reaction tube, *N*-allylpicolinamide **1a** (0.2 mmol), indoline **2a** (1.1 equiv),  $\text{Pd}(\text{OAc})_2$  (10 mol%),  $\text{Li}_2\text{CO}_3$  (3.0 equiv) and  $\text{CD}_3\text{CO}_2\text{D}$  (1.1 equiv) were taken. Acetonitrile (1 mL) was added, the reaction tube was capped, and placed it in a preheated oil bath at  $120^\circ\text{C}$  for 12 h. After 12 h,  $\text{MnO}_2$  (3.0 equiv) was added and further heated at  $120^\circ\text{C}$  for 12 h. After completion of the reaction (monitored by TLC), the crude mixture was diluted with DCM and concentrated on a rota vapour. The crude residue was purified through column chromatography on silica gel using ethyl acetate in hexane to get pure product **3a-D** (36.2 mg, 65%).

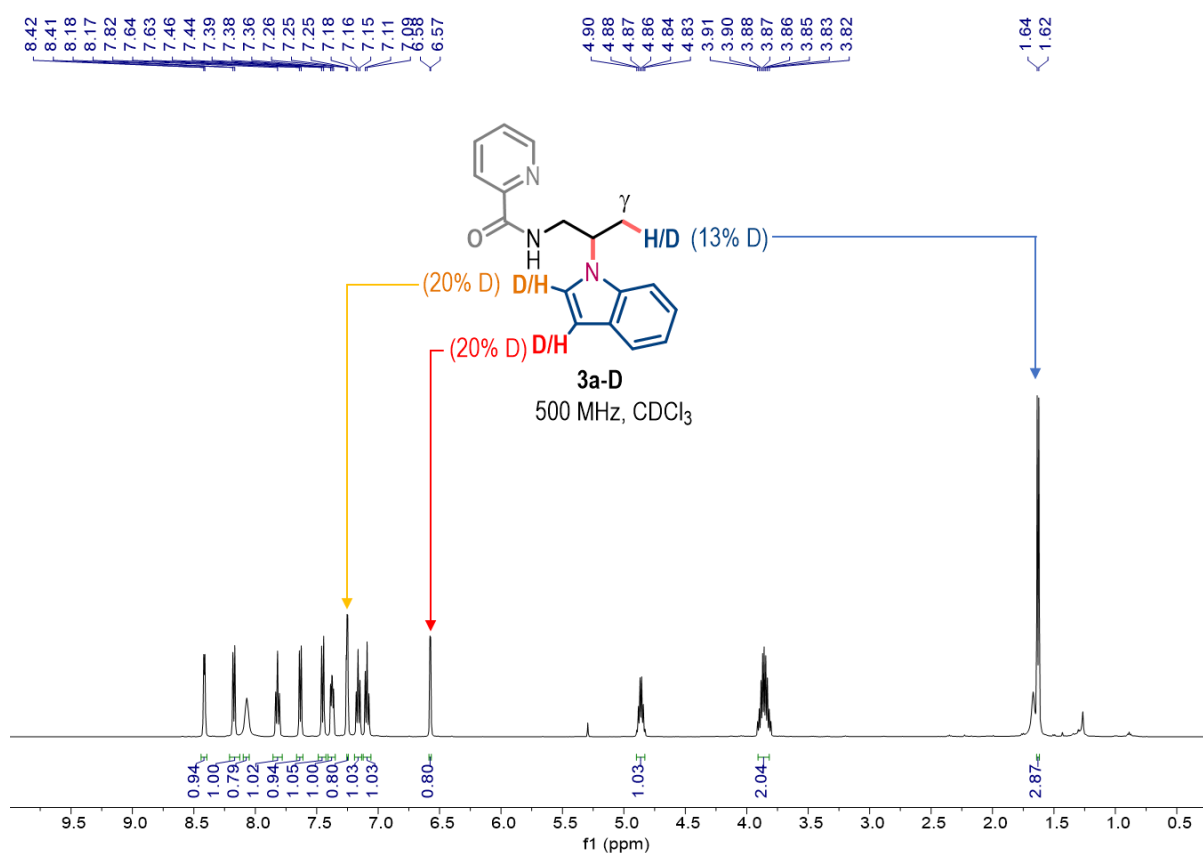

## 12. Characterization data of synthesized compounds

### *N*-(2-(1H-indol-1-yl)propyl)picolinamide (3a):

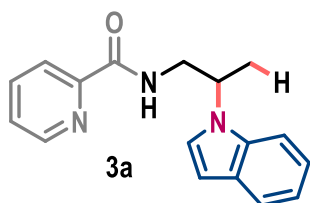

Compound **3a** was synthesized according to GP-1 as colorless sticky solid; eluent (20% ethyl acetate in hexane); **Yield:** 85% (48 mg); **<sup>1</sup>H NMR (500 MHz, CDCl<sub>3</sub>)** δ 8.42 – 8.41 (m, 1H), 8.18 (d, *J* = 7.8 Hz, 1H), 8.07 (t, *J* = 6.5 Hz, 1H), 7.81 (td, *J* = 7.7, 1.7 Hz, 1H), 7.64 (d, *J* = 7.9 Hz, 1H), 7.46 (d, *J* = 8.3 Hz, 1H), 7.38 – 7.36 (m, 1H), 7.25 (d, *J* = 3.3 Hz, 1H), 7.18 – 7.15 (m, 1H), 7.09 (t, *J* = 7.4 Hz, 1H), 6.58 (d, *J* = 3.3 Hz, 1H), 4.90 – 4.83 (m, 1H), 3.91 – 3.82 (m, 2H), 1.63 (d, *J* = 6.9 Hz, 3H); **<sup>13</sup>C NMR (126 MHz, CDCl<sub>3</sub>)** δ 164.9, 149.5, 148.2, 137.4, 136.2, 128.8, 126.3, 124.0, 122.3, 121.7, 121.1, 119.7, 109.8, 102.3, 51.3, 44.9, 18.5; **HRMS (ESI/TOF-Q)** *m/z*: [M+H]<sup>+</sup> Calculated for C<sub>17</sub>H<sub>17</sub>N<sub>3</sub>OH<sup>+</sup> 280.1444; Found 280.1447.

### *N*-(2-(5-methyl-1H-indol-1-yl)propyl)picolinamide (3b):

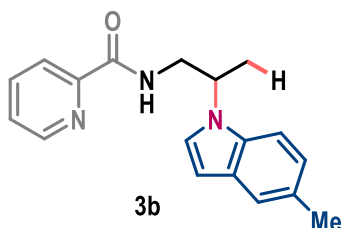

Compound **3b** was synthesized according to GP-1 as colorless sticky solid; eluent (20% ethyl acetate in hexane); **Yield:** 84% (49 mg); **<sup>1</sup>H NMR (400 MHz, CDCl<sub>3</sub>)** δ 8.42 (d, *J* = 4.7 Hz, 1H), 8.17 (d, *J* = 7.8 Hz, 1H), 8.06 (brs, 1H), 7.84 – 7.80 (m, 1H), 7.42 (s, 1H), 7.39 – 7.36 (m, 1H), 7.34 (d, *J* = 8.8 Hz, 1H), 7.21 – 7.19 (m, 1H), 7.00 (d, *J* = 8.4 Hz, 1H), 6.49 – 6.47 (m, 1H), 4.85 – 4.77 (m, 1H), 3.91 – 3.81 (m, 2H), 2.43 (s, 3H), 1.61 (d, *J* = 8.4 Hz, 3H); **<sup>13</sup>C NMR (101 MHz, CDCl<sub>3</sub>)** δ 164.9, 149.6, 148.2, 137.4, 134.6, 129.1, 128.9, 126.3, 124.2, 123.3, 122.3, 120.7, 109.5, 101.7, 51.4, 44.7, 21.5, 18.5; **HRMS (ESI/TOF-Q)** *m/z*: [M+H]<sup>+</sup> Calculated for C<sub>18</sub>H<sub>19</sub>N<sub>3</sub>OH<sup>+</sup> 294.1601; Found 294.1607.

### *N*-(2-(4-methoxy-1H-indol-1-yl)propyl)picolinamide (3c):

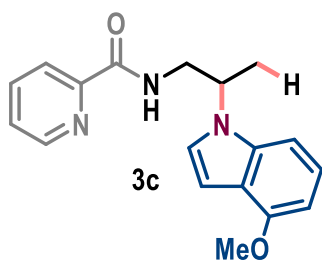

Compound **3c** was synthesized according to GP-1 as brown gummy solid; eluent (25% ethyl acetate in hexane); **Yield:** 86% (53 mg); **<sup>1</sup>H NMR (400 MHz, CDCl<sub>3</sub>)** δ 8.42 – 8.41 (m, 1H), 8.18 – 8.15 (m, 1H), 8.06 (brs, 1H), 7.84 – 7.79 (m, 1H), 7.39 – 7.36 (m, 1H), 7.15 (d, *J* = 3.3 Hz, 1H), 7.11 – 7.06 (m, 2H), 6.67 (d, *J* = 3.2 Hz, 1H), 6.52 – 6.50 (m, 1H), 4.84 – 4.77 (m, 1H), 3.95 (s, 3H), 3.88 – 3.80 (m, 2H), 1.61 (d, *J* = 6.9 Hz, 3H); **<sup>13</sup>C NMR (101 MHz, CDCl<sub>3</sub>)** δ 164.9, 153.6, 149.5, 148.2, 137.7, 137.4, 126.4, 122.6 (2xC), 122.3, 119.3, 103.3, 99.6, 99.5, 55.4, 51.6, 44.8, 18.5; **HRMS (ESI/TOF-Q)** *m/z*: [M+H]<sup>+</sup> Calculated for C<sub>18</sub>H<sub>19</sub>N<sub>3</sub>O<sub>2</sub>H<sup>+</sup> 310.1550; Found 310.1556.

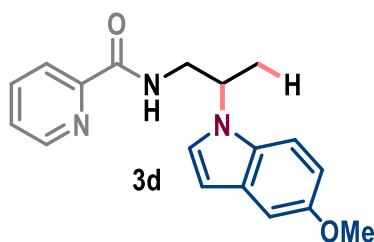

#### *N*-(2-(5-methoxy-1H-indol-1-yl)propyl)picolinamide (**3d**):

Compound **3d** was synthesized according to GP-1 as colorless gummy liquid; eluent (25% ethyl acetate in hexane); **Yield:** 85% (52 mg); **<sup>1</sup>H NMR (400 MHz, CDCl<sub>3</sub>)** δ 8.42 – 8.41 (m, 1H), 8.18 – 8.16 (m, 1H), 8.07 (brs, 1H), 7.83 – 7.79 (m, 1H), 7.39 – 7.36 (m, 1H), 7.34 (d, *J* = 9.1 Hz, 1H), 7.21 (d, *J* = 3.2 Hz, 1H), 7.09 (d, *J* = 2.5 Hz, 1H), 6.84 – 6.81 (m, 1H), 6.49 – 6.48 (m, 1H), 4.83 – 4.75 (m, 1H), 3.85 – 3.83 (m, 4H), 3.82 – 3.78 (m, 1H), 1.61 (d, *J* = 6.9 Hz, 3H); **<sup>13</sup>C NMR (101 MHz, CDCl<sub>3</sub>)** δ 164.9, 154.2, 149.5, 148.2, 137.4, 131.5, 129.1, 126.4, 124.6, 122.3, 112.1, 110.5, 102.7, 101.8, 56.0, 51.4, 44.9, 18.4; **HRMS (ESI/TOF-Q)** *m/z*: [M+H]<sup>+</sup> Calculated for C<sub>18</sub>H<sub>19</sub>N<sub>3</sub>O<sub>2</sub>H<sup>+</sup> 310.1550; Found 310.1551.

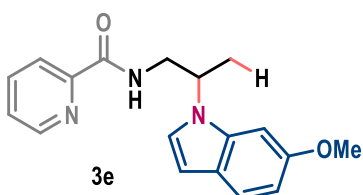

#### *N*-(2-(6-methoxy-1H-indol-1-yl)propyl)picolinamide (**3e**):

Compound **3e** was synthesized according to GP-1 as colorless gummy solid; eluent (25% ethyl acetate in hexane); **Yield:** 86% (53 mg); **<sup>1</sup>H NMR (400 MHz, CDCl<sub>3</sub>)** δ 8.42 – 8.40 (m, 1H), 8.18 – 8.16 (m, 1H), 8.08 (brs, 1H), 7.82 (td, *J* = 7.7, 1.7 Hz, 1H), 7.48 (d, *J* = 8.6 Hz, 1H), 7.39 – 7.36 (m, 1H), 7.14 (d, *J* = 3.3 Hz, 1H), 6.90 (d, *J* = 2.2 Hz, 1H), 6.75 (dd, *J* = 8.6, 2.2 Hz, 1H), 6.50 (dd, *J* = 3.3, 0.8 Hz, 1H), 4.83 – 4.75 (m, 1H), 3.93 – 3.86 (m, 1H), 3.79 – 3.72 (m, 4H), 1.62 (d, *J* = 6.9 Hz, 3H); **<sup>13</sup>C NMR (101 MHz, CDCl<sub>3</sub>)** δ 164.9, 156.4, 149.5, 148.2, 137.4, 137.1, 126.4, 122.9, 122.6, 122.3, 121.6, 109.9, 102.3, 93.3, 55.8, 51.1, 45.0, 18.4; **HRMS (ESI/TOF-Q)** *m/z*: [M+H]<sup>+</sup> Calculated for C<sub>18</sub>H<sub>19</sub>N<sub>3</sub>O<sub>2</sub>H<sup>+</sup> 310.1550; Found 310.1555.

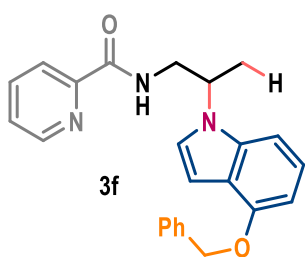

#### *N*-(2-(4-(benzyloxy)-1H-indol-1-yl)propyl)picolinamide (**3f**):

Compound **3f** was synthesized according to GP-1 as colorless gummy liquid; eluent (25% ethyl acetate in hexane); **Yield:** 82% (63 mg); **<sup>1</sup>H NMR (400 MHz, CDCl<sub>3</sub>)** δ 8.42 – 8.41 (m, 1H), 8.19 – 8.17 (m, 1H), 8.09 (brs, 1H), 7.83 – 7.79 (m, 1H), 7.54 – 7.51 (m, 2H), 7.43 – 7.33 (m, 4H), 7.17 (d, *J* = 3.3 Hz, 1H), 7.09 – 7.07 (m, 2H), 6.76 – 6.75 (m, 1H), 6.58 (dd, *J* = 6.6, 1.9 Hz, 1H), 5.24 (s, 2H), 4.86 – 4.81 (m, 1H), 3.91 – 3.82 (m, 2H), 1.62 (d, *J* = 6.9 Hz, 3H); **<sup>13</sup>C NMR (101 MHz, CDCl<sub>3</sub>)** δ 164.9, 152.7, 149.5, 148.2, 137.8, 137.7, 137.4, 128.6, 127.8, 127.4, 126.3, 122.6, 122.5, 122.3, 119.7, 103.5, 101.0, 99.8, 70.0, 51.5, 44.8, 18.5; **HRMS (ESI/TOF-Q)** *m/z*: [M+H]<sup>+</sup> Calculated for C<sub>24</sub>H<sub>23</sub>N<sub>3</sub>O<sub>2</sub>H<sup>+</sup> 386.1863; Found 386.1859.

#### *N*-(2-(4-(allyloxy)-1H-indol-1-yl)propyl)picolinamide (**3g**):

Compound **3g** was synthesized according to GP-1 as off brown gummy liquid; eluent (20% ethyl acetate in hexane); **Yield:** 80% (53 mg); **<sup>1</sup>H NMR (400 MHz, CDCl<sub>3</sub>)** δ 8.42 – 8.41 (m, 1H), 8.17 (dt, *J* = 7.9, 1.1 Hz, 1H), 8.06 (brs, 1H), 7.81 (td, *J* = 7.7, 1.7 Hz, 1H), 7.39 – 7.35 (m, 1H), 7.15 (d, *J* = 3.3 Hz, 1H), 7.07 – 7.06

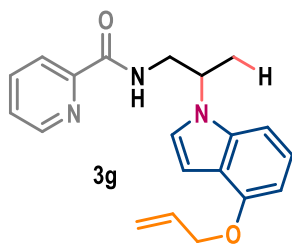

(m, 2H), 6.71 (d,  $J = 3.3$  Hz, 1H), 6.51 (dd,  $J = 5.2, 3.2$  Hz, 1H), 6.20 – 6.11 (m, 1H), 5.51 – 5.45 (m, 1H), 5.31 – 5.28 (m, 1H), 4.84 – 4.79 (m, 1H), 4.70 – 4.68 (m, 2H), 3.91 – 3.80 (m, 2H), 1.61 (d,  $J = 6.9$  Hz, 3H);  $^{13}\text{C}$  NMR (101 MHz,  $\text{CDCl}_3$ )  $\delta$  164.9, 152.5, 149.5, 148.2, 137.8, 137.4, 133.9, 126.3, 122.6, 122.5, 122.3, 119.6, 117.3, 103.4, 100.9, 99.7, 69.0, 51.6, 44.8, 18.5; HRMS (ESI/TOF-Q)  $m/z$ :  $[\text{M}+\text{H}]^+$  Calculated for  $\text{C}_{20}\text{H}_{21}\text{N}_3\text{O}_2\text{H}^+$  336.1707; Found 336.1718.

#### *N*-(2-(5-phenyl-1H-indol-1-yl)propyl)picolinamide (3h):

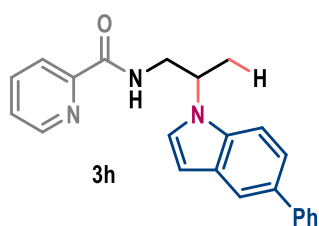

Compound **3h** was synthesized according to GP-1 as colorless sticky solid; eluent (20% ethyl acetate in hexane); **Yield:** 83% (59 mg);  $^1\text{H}$  NMR (400 MHz,  $\text{CDCl}_3$ )  $\delta$  8.42 – 8.41 (m, 1H), 8.20 – 8.17 (m, 1H), 8.10 (brs, 1H), 7.85 – 7.80 (m, 2H), 7.64 – 7.61 (m, 2H), 7.51 (d,  $J = 8.6$  Hz, 1H), 7.46 – 7.40 (m, 3H), 7.39 – 7.36 (m, 1H), 7.33 – 7.30 (m, 1H), 7.29 – 7.28 (m, 1H), 6.63 (d,  $J = 3.2$  Hz, 1H), 4.93 – 4.86 (m, 1H), 3.93 – 3.82 (m, 2H), 1.65 (d,  $J = 6.8$  Hz, 3H);  $^{13}\text{C}$  NMR (101 MHz,  $\text{CDCl}_3$ )  $\delta$  165.0, 149.5, 148.2, 142.6, 137.4, 135.8, 133.3, 129.3, 128.8, 127.5 (2xC), 126.4, 124.7, 122.3, 121.6, 119.6, 110.0, 102.8, 51.5, 44.9, 18.5; HRMS (ESI/TOF-Q)  $m/z$ :  $[\text{M}+\text{H}]^+$  Calculated for  $\text{C}_{23}\text{H}_{21}\text{N}_3\text{OH}^+$  356.1757; Found 356.1757.

#### *N*-(2-(5-(naphthalen-2-yl)-1H-indol-1-yl)propyl)picolinamide (3i):

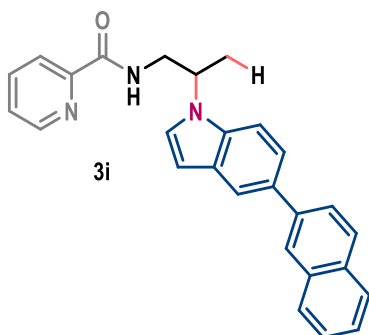

Compound **3i** was synthesized according to GP-1 as off brown gummy liquid; eluent (20% ethyl acetate in hexane); **Yield:** 81% (66 mg);  $^1\text{H}$  NMR (400 MHz,  $\text{CDCl}_3$ )  $\delta$  8.46 – 8.44 (m, 1H), 8.22 – 8.19 (m, 1H), 8.15 (brs, 1H), 7.96 – 7.90 (m, 2H), 7.86 – 7.81 (m, 2H), 7.76 – 7.75 (m, 1H), 7.56 – 7.51 (m, 2H), 7.50 – 7.46 (m, 2H), 7.41 – 7.37 (m, 2H), 7.34 (d,  $J = 3.2$  Hz, 1H), 7.31 – 7.29 (m, 1H), 6.65 – 6.64 (m, 1H), 4.97 – 4.92 (m, 1H), 4.00 – 3.94 (m, 1H), 3.92 – 3.85 (m, 1H), 1.70 (d,  $J = 6.9$  Hz, 3H);  $^{13}\text{C}$  NMR (101 MHz,  $\text{CDCl}_3$ )  $\delta$  165.0, 149.5, 148.2, 141.5, 137.5, 135.6, 134.0, 132.4, 128.8, 128.3, 127.3, 127.1, 126.7, 126.4, 125.8, 125.7, 125.5, 124.6, 124.3, 122.4, 122.3, 117.0, 109.4, 102.6, 51.4, 45.1, 18.5; HRMS (ESI/TOF-Q)  $m/z$ :  $[\text{M}+\text{H}]^+$  Calculated for  $\text{C}_{27}\text{H}_{23}\text{N}_3\text{OH}^+$  406.1914; Found 406.1923.

#### *N*-(2-(5-fluoro-1H-indol-1-yl)propyl)picolinamide (3j):

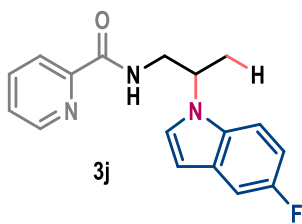

Compound **3j** was synthesized according to GP-1 as colorless sticky solid; eluent (25% ethyl acetate in hexane); **Yield:** 76% (45 mg);  $^1\text{H}$  NMR (400 MHz,  $\text{CDCl}_3$ )  $\delta$  8.42 – 8.40 (m, 1H), 8.18 – 8.15 (m, 1H), 8.06 (brs, 1H), 7.82 (td,  $J = 7.7, 1.7$  Hz, 1H), 7.39 – 7.34 (m, 2H), 7.28 – 7.24 (m, 2H), 6.88 (td,  $J = 9.1, 2.5$  Hz, 1H), 6.53 – 6.52 (m, 1H), 4.84 – 4.79 (m, 1H), 3.86 – 3.76 (m, 2H), 1.62 (d,  $J = 6.9$  Hz, 3H);  $^{13}\text{C}$  NMR (101 MHz,  $\text{CDCl}_3$ )  $\delta$  164.9,  $\delta$  158.0 (d,  $J = 234.0$  Hz), 149.4, 148.2, 137.4, 132.9, 128.9 (d,  $J = 10.1$  Hz), 126.4, 125.4, 122.3, 110.3 (d,  $J = 7.2$  Hz), 110.2 (d,  $J = 43.2$  Hz), 105.7 (d,  $J = 23.2$  Hz), 102.3 (d,  $J = 4.5$  Hz), 51.4, 45.1,

18.4;  $^{19}\text{F}$  NMR (376 MHz,  $\text{CDCl}_3$ )  $\delta$  -125.30 (d,  $J$  = 1.7 Hz); **HRMS** (ESI/TOF-Q)  $m/z$ :  $[\text{M}+\text{Na}]^+$  Calculated for  $\text{C}_{17}\text{H}_{16}\text{FN}_3\text{ONa}^+$  320.1170; Found 320.1182.

***N*-(2-(6-fluoro-1H-indol-1-yl)propyl)picolinamide (3k):**

Compound **3k** was synthesized according to GP-1 as colorless sticky solid; eluent (25% ethyl acetate in hexane); **Yield**: 78% (46 mg);  $^1\text{H}$  NMR (400 MHz,  $\text{CDCl}_3$ )  $\delta$  8.41 – 8.39 (m, 1H), 8.18 – 8.15 (m, 1H), 8.07 (brs, 1H), 7.83 – 7.79 (m, 1H), 7.53 – 7.49 (m, 1H), 7.38 – 7.35 (m, 1H), 7.22 (d,  $J$  = 3.3 Hz, 1H), 7.13 – 7.10 (m, 1H), 6.86 – 6.81 (m, 1H), 6.54 (d,  $J$  = 3.3 Hz, 1H), 4.79 – 4.70 (m, 1H), 3.91 – 3.84 (m, 1H), 3.80 – 3.73 (m, 1H), 1.61 (d,  $J$  = 7.0 Hz, 3H);  $^{13}\text{C}$  NMR (101 MHz,  $\text{CDCl}_3$ )  $\delta$  164.9, 159.9 (d,  $J$  = 237.5 Hz), 149.4, 148.2, 137.4, 136.3 (d,  $J$  = 12.0 Hz), 126.4, 125.1, 124.3 (d,  $J$  = 3.7 Hz), 122.3, 121.7 (d,  $J$  = 10.0 Hz), 108.4 (d,  $J$  = 24.6 Hz), 102.5, 96.2 (d,  $J$  = 26.7 Hz), 51.4, 44.9, 18.3;  $^{19}\text{F}$  NMR (376 MHz,  $\text{CDCl}_3$ )  $\delta$  -120.92; **HRMS** (ESI/TOF-Q)  $m/z$ :  $[\text{M}+\text{Na}]^+$  Calculated for  $\text{C}_{17}\text{H}_{16}\text{FN}_3\text{ONa}^+$  320.1170; Found 320.1176.

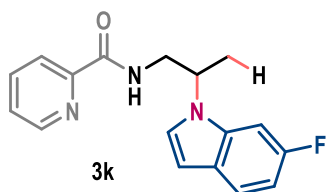

***N*-(2-(4-chloro-1H-indol-1-yl)propyl)picolinamide (3l):**

Compound **3l** was synthesized according to GP-1 as colorless gummy solid; eluent (20% ethyl acetate in hexane); **Yield**: 81% (51 mg);  $^1\text{H}$  NMR (400 MHz,  $\text{CDCl}_3$ )  $\delta$  8.43 – 8.41 (m, 1H), 8.16 (dd,  $J$  = 7.9, 1.0 Hz, 1H), 8.05 (brs, 1H), 7.82 (td,  $J$  = 7.8, 1.7 Hz, 1H), 7.40 – 7.37 (m, 1H), 7.34 (d,  $J$  = 7.6, 1H), 7.28 (d,  $J$  = 3.3 Hz, 1H), 7.09 – 7.03 (m, 2H), 6.68 (d,  $J$  = 3.3 Hz, 1H), 4.89 – 4.80 (m, 1H), 3.90 – 3.83 (m, 1H), 3.83 – 3.76 (m, 1H), 1.63 (d,  $J$  = 6.9 Hz, 3H);  $^{13}\text{C}$  NMR (101 MHz,  $\text{CDCl}_3$ )  $\delta$  165.0, 149.4, 148.2, 137.5, 137.1, 127.5, 126.5, 126.3, 124.6, 122.34, 122.30, 119.5, 108.5, 101.1, 51.7, 45.0, 18.5; **HRMS** (ESI/TOF-Q)  $m/z$ :  $[\text{M}+\text{Na}]^+$  Calculated for  $\text{C}_{17}\text{H}_{16}\text{ClN}_3\text{ONa}^+$  336.0874; Found 336.0879.

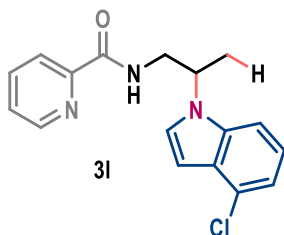

***N*-(2-(5-chloro-1H-indol-1-yl)propyl)picolinamide (3m):**

Compound **3m** was synthesized according to GP-1 as off white gummy liquid; eluent (20% ethyl acetate in hexane); **Yield**: 80% (50 mg);  $^1\text{H}$  NMR (500 MHz,  $\text{CDCl}_3$ )  $\delta$  8.41 (d,  $J$  = 4.7 Hz, 1H), 8.16 (d,  $J$  = 7.9 Hz, 1H), 8.05 (brs, 1H), 7.82 (t,  $J$  = 7.6 Hz, 1H), 7.57 (s, 1H), 7.39 – 7.38 (m, 1H), 7.36 – 7.34 (m, 1H), 7.27 – 7.25 (m, 1H), 7.08 (d,  $J$  = 8.8 Hz, 1H), 6.50 (d,  $J$  = 5.7 Hz, 1H), 4.86 – 4.79 (m, 1H), 3.87 – 3.82 (m, 1H), 3.80 – 3.74 (m, 1H), 1.62 (d,  $J$  = 6.7 Hz, 3H);  $^{13}\text{C}$  NMR (126 MHz,  $\text{CDCl}_3$ )  $\delta$  165.0, 149.4, 148.2, 137.5, 134.7, 129.7, 126.4, 125.3, 125.2, 122.3, 122.0, 120.4, 110.7, 102.0, 51.4, 45.0, 18.4; **HRMS** (ESI/TOF-Q)  $m/z$ :  $[\text{M}+\text{H}]^+$  Calculated for  $\text{C}_{17}\text{H}_{16}\text{ClN}_3\text{OH}^+$  314.1055; Found 314.1056.

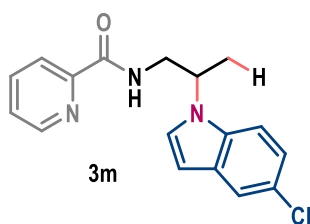

#### *N*-(2-(6-chloro-1H-indol-1-yl)propyl)picolinamide (**3n**):

Compound **3n** was synthesized according to GP-1 as brown gummy liquid; eluent (20% ethyl acetate in hexane); **Yield:** 82% (51 mg); **<sup>1</sup>H NMR (400 MHz, CDCl<sub>3</sub>)** δ 8.42 (d, 7.0 Hz, 1H), 8.19 – 8.16 (m, 1H), 8.06 (brs, 1H), 7.84 (td, *J* = 7.7, 1.7 Hz, 1H), 7.50 (dd, *J* = 8.5, 0.5 Hz, 1H), 7.41 – 7.38 (m, 2H), 7.23 (d, *J* = 3.3 Hz, 1H), 7.02 (dd, *J* = 8.4, 1.8 Hz, 1H), 6.54 (dd, *J* = 3.3, 0.9 Hz, 1H), 4.81 – 4.76 (m, 1H), 3.94 – 3.87 (m, 1H), 3.78 – 3.71 (m, 1H), 1.62 (d, *J* = 6.9 Hz, 3H); **<sup>13</sup>C NMR (126 MHz, CDCl<sub>3</sub>)** δ 165.0, 149.4, 148.2, 137.5, 136.7, 127.8, 127.2, 126.4, 124.7, 122.4, 121.9, 120.4, 109.9, 102.6, 51.5, 45.0, 18.5; **HRMS (ESI/TOF-Q)** *m/z*: [M+Na]<sup>+</sup> Calculated for C<sub>17</sub>H<sub>16</sub>ClN<sub>3</sub>ONa<sup>+</sup> 336.0874; Found 336.0879.

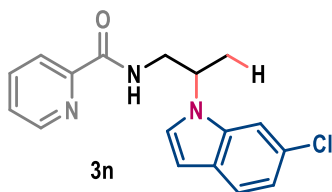

#### *N*-(2-(4-bromo-1H-indol-1-yl)propyl)picolinamide (**3o**):

Compound **3o** was synthesized according to GP-1 as brown gummy liquid; eluent (20% ethyl acetate in hexane); **Yield:** 76% (54 mg); **<sup>1</sup>H NMR (400 MHz, CDCl<sub>3</sub>)** δ 8.42 – 8.40 (m, 1H), 8.17 – 8.15 (m, 1H), 8.10 (brs, 1H), 7.82 (td, *J* = 7.7, 1.7 Hz, 1H), 7.40 – 7.37 (m, 2H), 7.30 (d, *J* = 3.3 Hz, 1H), 7.25 – 7.23 (m, 1H), 7.01 – 6.97 (m, 1H), 6.62 – 6.61 (m, 1H), 4.86 – 4.80 (m, 1H), 3.88 – 3.76 (m, 2H), 1.62 (d, *J* = 6.9 Hz, 3H); **<sup>13</sup>C NMR (101 MHz, CDCl<sub>3</sub>)** δ 164.9, 149.2, 148.1, 137.6, 136.6, 129.3, 126.5, 124.6, 122.6 (2xC), 122.4, 115.0, 109.0, 102.7, 51.6, 45.0, 18.5; **HRMS (ESI/TOF-Q)** *m/z*: [M+Na]<sup>+</sup> Calculated for C<sub>17</sub>H<sub>16</sub>BrN<sub>3</sub>ONa<sup>+</sup> 380.0369; Found 380.0372.

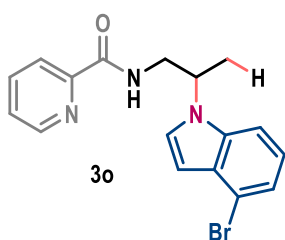

#### *N*-(2-(5-bromo-1H-indol-1-yl)propyl)picolinamide (**3p**):

Compound **3p** was synthesized according to GP-1 as off brown gummy liquid; eluent (20% ethyl acetate in hexane); **Yield:** 74% (53 mg); **<sup>1</sup>H NMR (400 MHz, CDCl<sub>3</sub>)** δ 8.41 – 8.39 (m, 1H), 8.16 – 8.14 (m, 1H), 8.05 (brs, 1H), 7.84 – 7.79 (m, 1H), 7.74 – 7.72 (m, 1H), 7.39 – 7.36 (m, 1H), 7.31 (d, *J* = 8.8 Hz, 1H), 7.24 (d, *J* = 3.2 Hz, 1H), 7.21 – 7.18 (m, 1H), 6.51 – 6.49 (m, 1H), 4.84 – 4.77 (m, 1H), 3.87 – 3.74 (m, 2H), 1.61 (d, *J* = 6.9 Hz, 3H); **<sup>13</sup>C NMR (101 MHz, CDCl<sub>3</sub>)** δ 165.0, 149.3, 148.2, 137.4, 135.0, 130.3, 126.4, 125.1, 124.5, 123.5, 122.3, 112.9, 111.2, 101.9, 51.4, 45.0, 18.4; **HRMS (ESI/TOF-Q)** *m/z*: [M+Na]<sup>+</sup> Calculated for C<sub>17</sub>H<sub>16</sub>BrN<sub>3</sub>ONa<sup>+</sup> 380.0369; Found 380.0377.

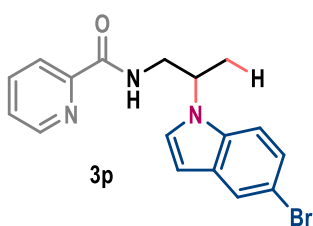

#### *N*-(2-(5-(trifluoromethyl)-1H-indol-1-yl)propyl)picolinamide (**3q**):

Compound **3q** was synthesized according to GP-1 as colorless gummy liquid; eluent (30% ethyl acetate in hexane); **Yield:** 63% (44 mg); **<sup>1</sup>H NMR (400 MHz, CDCl<sub>3</sub>)** δ 8.38 (d, *J* = 4.7 Hz, 1H), 8.15 (d, *J* = 7.8 Hz, 1H), 8.04 (brs, 1H), 7.91 – 7.90 (m, 1H), 7.84 – 7.79 (m, 1H), 7.50 (d, *J* = 8.7 Hz, 1H), 7.39 – 7.32 (m, 3H), 6.66 – 6.65 (m, 1H), 4.93 – 4.88 (m, 1H), 3.91 – 3.85 (m, 1H), 3.80 – 3.74 (m, 1H), 1.65 (d, *J* = 6.9 Hz, 3H); **<sup>13</sup>C NMR (101 MHz, CDCl<sub>3</sub>)** δ 165.0, 149.3, 148.2, 137.6,

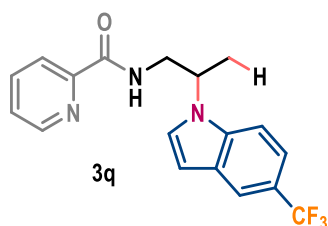

137.5, 128.0, 125.6, 124.3 (q,  $J = 271.1$  Hz), 122.28, 122.25, 121.9, 118.8 (q,  $J = 4.2$  Hz), 118.4 (q,  $J = 3.4$  Hz), 110.0, 103.5, 51.5, 45.1, 18.4;  $^{19}\text{F}$  NMR (376 MHz,  $\text{CDCl}_3$ )  $\delta$  -60.33; HRMS (ESI/TOF-Q)  $m/z$ :  $[\text{M}+\text{H}]^+$  Calculated for  $\text{C}_{18}\text{H}_{16}\text{F}_3\text{N}_3\text{OH}^+$  348.1318; Found 348.1317.

#### *N*-(2-(4-cyano-1H-indol-1-yl)propyl)picolinamide (3r):

Compound **3r** was synthesized according to GP-1 as off white gummy liquid; eluent (30% ethyl acetate in hexane); **Yield:** 70% (42 mg);  $^1\text{H}$  NMR (500 MHz,  $\text{CDCl}_3$ )  $\delta$  8.44 – 8.40 (m, 1H), 8.16 – 8.14 (m, 1H), 8.05 (brs, 1H), 7.85 – 7.81 (m, 1H), 7.69 – 7.67 (m, 1H), 7.44 – 7.39 (m, 3H), 7.17 – 7.13 (m, 1H), 6.79 (d,  $J = 3.8$  Hz, 1H), 4.94 – 4.90 (m, 1H), 3.87 – 3.75 (m, 2H), 1.66 (d,  $J = 10.1$  Hz, 3H);  $^{13}\text{C}$  NMR (126 MHz,  $\text{CDCl}_3$ )  $\delta$  165.1, 149.3, 148.3, 137.5, 136.1, 129.9, 126.60, 126.56, 125.3, 122.3, 121.4, 118.9, 114.6, 103.4, 101.5, 51.5, 45.3, 18.5; HRMS (ESI/TOF-Q)  $m/z$ :  $[\text{M}+\text{H}]^+$  Calculated for  $\text{C}_{18}\text{H}_{16}\text{N}_4\text{OH}^+$  305.1397; Found 305.1410.

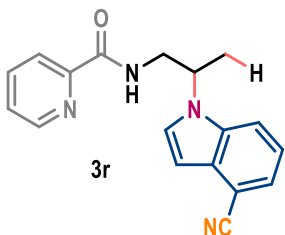

#### methyl 1-(1-(picolinamido)propan-2-yl)-1H-indole-5-carboxylate (3s):

Compound **3s** was synthesized according to GP-1 as brown gummy liquid; eluent (30% ethyl acetate in hexane); **Yield:** 75% (50 mg);  $^1\text{H}$  NMR (400 MHz,  $\text{CDCl}_3$ )  $\delta$  8.39 – 8.37 (m, 2H), 8.16 (d,  $J = 8.0$  Hz, 1H), 8.04 (brs, 1H), 7.84 – 7.79 (m, 2H), 7.42 (d,  $J = 8.8$  Hz, 1H), 7.39 – 7.36 (m, 1H), 7.31 (d,  $J = 3.3$  Hz, 1H), 6.67 – 6.66 (m, 1H), 4.94 – 4.85 (m, 1H), 3.91 (s, 3H), 3.89 – 3.86 (m, 1H), 3.81 – 3.74 (m, 1H), 1.64 (d,  $J = 6.9$  Hz, 3H);  $^{13}\text{C}$  NMR (101 MHz,  $\text{CDCl}_3$ )  $\delta$  168.3, 165.0, 149.3, 148.2, 138.8, 137.5, 128.2, 126.5, 125.3, 124.2, 123.1, 122.3, 121.8, 109.4, 104.0, 51.9, 51.5, 45.1, 18.5; HRMS (ESI/TOF-Q)  $m/z$ :  $[\text{M}+\text{H}]^+$  Calculated for  $\text{C}_{19}\text{H}_{19}\text{N}_3\text{O}_3\text{H}^+$  338.1499; Found 338.1508.

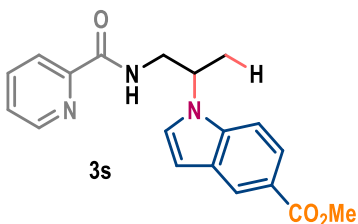

#### *N*-(2-(5-nitro-1H-indol-1-yl)propyl)picolinamide (3t):

Compound **3t** was synthesized according to GP-1 as yellow sticky solid; eluent (35% ethyl acetate in hexane); **Yield:** 62% (40 mg);  $^1\text{H}$  NMR (500 MHz,  $\text{CDCl}_3$ )  $\delta$  8.55 (d,  $J = 2.2$  Hz, 1H), 8.39 – 8.38 (m, 1H), 8.14 (d,  $J = 7.8$  Hz, 1H), 8.06 (t,  $J = 6.6$  Hz, 1H), 8.00 (dd,  $J = 9.1, 2.2$  Hz, 1H), 7.82 (td,  $J = 7.7, 1.7$  Hz, 1H), 7.45 (d,  $J = 9.1$  Hz, 1H), 7.40 – 7.37 (m, 2H), 6.75 (d,  $J = 3.3$  Hz, 1H), 4.97 – 4.91 (m, 1H), 3.90 – 3.85 (m, 1H), 3.78 – 3.72 (m, 1H), 1.67 (d,  $J = 6.9$  Hz, 3H);  $^{13}\text{C}$  NMR (126 MHz,  $\text{CDCl}_3$ )  $\delta$  165.1, 149.2, 148.2, 141.8, 139.3, 137.6, 127.8, 127.0, 126.6, 122.3, 118.3, 117.4, 109.6, 105.2, 51.7, 45.3, 18.4; HRMS (ESI/TOF-Q)  $m/z$ :  $[\text{M}+\text{H}]^+$  Calculated for  $\text{C}_{17}\text{H}_{16}\text{N}_4\text{OH}^+$  325.1295; Found 325.1301.

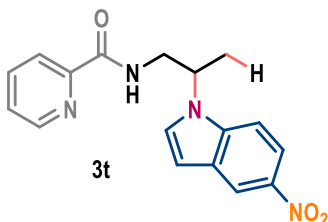



#### 4-(1H-indol-1-yl)-N-(quinolin-8-yl)butanamide (4a):

Compound **4a** was synthesized according to GP-2 as brown sticky solid; eluent (20% ethyl acetate in hexane); **Yield:** 73% (48 mg); **<sup>1</sup>H NMR (500 MHz, CDCl<sub>3</sub>)** δ 9.76 (brs, 1H), 8.80 – 8.77 (m, 2H), 8.16 (d, *J* = 8.3 Hz, 1H), 7.65 (d, *J* = 7.9 Hz, 1H), 7.58 – 7.51 (m, 2H), 7.47 – 7.42 (m, 2H), 7.21 – 7.17 (m, 2H), 7.12 – 7.09 (m, 1H), 6.53 – 6.52 (m, 1H), 4.33 – 4.30 (m, 2H), 2.55 – 2.52 (m, 2H), 2.39 – 2.33 (m, 2H); **<sup>13</sup>C NMR (126 MHz, CDCl<sub>3</sub>)** δ 170.6, 148.2, 138.3, 136.6, 136.1, 134.4, 128.8, 128.1, 128.0, 127.5, 121.8, 121.73, 121.68, 121.1, 119.5, 116.7, 109.6, 101.4, 45.5, 34.5, 25.9; **HRMS (ESI/TOF-Q)** *m/z*: [M+H]<sup>+</sup> Calculated for C<sub>21</sub>H<sub>19</sub>N<sub>3</sub>OH<sup>+</sup> 330.1601; Found 330.1611.

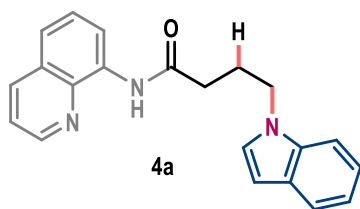

#### 4-(5-methyl-1H-indol-1-yl)-N-(quinolin-8-yl)butanamide (4b):

Compound **4b** was synthesized according to GP-2 as off white gummy solid; eluent (20% ethyl acetate in hexane); **Yield:** 75% (51 mg); **<sup>1</sup>H NMR (500 MHz, CDCl<sub>3</sub>)** δ 9.73 (brs, 1H), 8.77 (d, *J* = 5.6 Hz, 2H), 8.16 (d, *J* = 8.3 Hz, 1H), 7.57 – 7.50 (m, 2H), 7.46 – 7.44 (m, 1H), 7.41 (s, 1H), 7.30 (d, *J* = 8.3 Hz, 1H), 7.13 – 7.12 (m, 1H), 7.00 (d, *J* = 8.4 Hz, 1H), 6.43 – 6.42 (m, 1H), 4.30 – 4.27 (m, 2H), 2.53 – 2.50 (m, 2H), 2.43 (s, 3H), 2.38 – 2.34 (m, 2H); **<sup>13</sup>C NMR (126 MHz, CDCl<sub>3</sub>)** δ 170.7, 148.3, 138.4, 136.5, 134.6, 134.5, 129.1, 128.7 (2xC), 128.1, 127.5, 123.3, 121.8, 121.7, 120.7, 116.7, 109.3, 100.9, 45.6, 34.5, 25.9, 21.5; **HRMS (ESI/TOF-Q)** *m/z*: [M+H]<sup>+</sup> Calculated for C<sub>22</sub>H<sub>21</sub>N<sub>3</sub>OH<sup>+</sup> 344.1757; Found 344.1759.

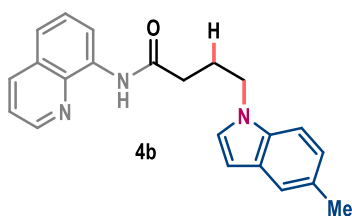

#### 4-(4-methoxy-1H-indol-1-yl)-N-(quinolin-8-yl)butanamide (4c):

Compound **4c** was synthesized according to GP-2 as colorless gummy liquid; eluent (20% ethyl acetate in hexane); **Yield:** 78% (56 mg); **<sup>1</sup>H NMR (500 MHz, CDCl<sub>3</sub>)** δ 9.84 (brs, 1H), 8.80 – 8.78 (m, 2H), 8.22 (d, *J* = 8.2 Hz, 1H), 7.59 – 7.53 (m, 2H), 7.50 – 7.48 (m, 1H), 7.11 (t, *J* = 8.0 Hz, 1H), 7.08 (d, *J* = 3.2 Hz, 1H), 7.05 – 7.03 (m, 1H), 6.61 – 6.60 (m, 1H), 6.51 – 6.50 (m, 1H), 4.29 (t, *J* = 6.8 Hz, 2H), 3.95 (s, 3H), 2.56 (t, *J* = 7.1 Hz, 2H), 2.38 – 2.32 (m, 2H); **<sup>13</sup>C NMR (126 MHz, CDCl<sub>3</sub>)** δ 170.8, 153.6, 147.8, 137.7, 134.2, 128.2, 127.9, 126.6, 122.5 (2xC), 121.8, 121.7, 119.3, 103.2 (2xC), 99.4 (2xC), 98.7, 55.4, 45.8, 34.5, 26.0; **HRMS (ESI/TOF-Q)** *m/z*: [M+H]<sup>+</sup> Calculated for C<sub>22</sub>H<sub>21</sub>N<sub>3</sub>O<sub>2</sub>H<sup>+</sup> 360.1707; Found 360.1716.

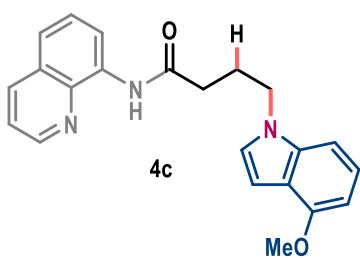

#### 4-(4-(allyloxy)-1H-indol-1-yl)-N-(quinolin-8-yl)butanamide (4d):

Compound **4d** was synthesized according to GP-2 as brown gummy liquid; eluent (25% ethyl acetate in hexane); **Yield:** 74% (57 mg); **<sup>1</sup>H NMR (500 MHz, CDCl<sub>3</sub>)** δ 9.73 (brs, 1H), 8.77 (d, *J* = 5.5 Hz, 2H), 8.16 (d, *J* = 8.4 Hz, 1H), 7.55 – 7.50 (m, 2H), 7.46 – 7.43 (m, 1H), 7.10 – 7.02 (m, 3H), 6.67 – 6.64 (m, 1H), 6.52 – 6.50 (m, 1H), 6.19 – 6.13 (m, 1H), 5.48 (d, *J* = 17.2 Hz, 1H), 5.30 (d, *J* = 10.6 Hz, 1H), 4.69 (d, *J* = 5.2 Hz, 2H), 4.30 – 4.27 (m, 2H), 2.53 – 2.50 (m, 2H), 2.38 – 2.33 (m, 2H);

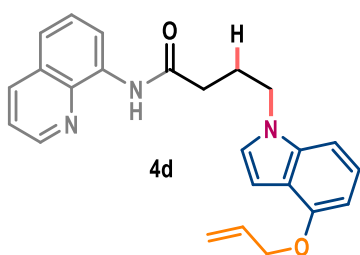



**<sup>13</sup>C NMR (126 MHz, CDCl<sub>3</sub>)** δ 170.7, 152.6, 148.3, 138.4, 137.8, 136.5, 134.5, 134.0, 128.1, 127.5, 126.6, 122.5, 121.8, 121.7, 119.6, 117.3, 116.7, 103.2, 100.8, 98.9, 69.0, 45.8, 34.5, 25.9; **HRMS** (ESI/TOF-Q) m/z: [M+H]<sup>+</sup> Calculated for C<sub>22</sub>H<sub>21</sub>N<sub>3</sub>O<sub>2</sub>H<sup>+</sup> 386.1863; Found 386.1863.

#### 4-(5-methoxy-1H-indol-1-yl)-N-(quinolin-8-yl)butanamide (4e):

Compound **4e** was synthesized according to GP-2 as off white gummy liquid; eluent (25% ethyl acetate in hexane); **Yield:** 80% (57 mg); **<sup>1</sup>H NMR (500 MHz, CDCl<sub>3</sub>)** δ 9.73 (brs, 1H), 8.78 – 8.76 (m, 2H), 8.18 – 8.16 (m, 1H), 7.55 – 7.51 (m, 2H), 7.47 – 7.44 (m, 1H), 7.31 – 7.29 (m, 1H), 7.14 (d, *J* = 3.1 Hz, 1H), 7.09 (d, *J* = 2.3 Hz, 1H), 6.85 – 6.83 (m, 1H), 6.43 – 6.42 (m, 1H), 4.29 – 4.27 (m, 2H), 3.84 (s, 3H), 2.53 – 2.51 (m, 2H), 2.37 – 2.33 (m, 2H); **<sup>13</sup>C NMR (126 MHz, CDCl<sub>3</sub>)** δ 170.7, 154.1, 148.3, 138.4, 136.5, 134.5, 131.5, 129.1, 128.6, 128.1, 127.5, 121.8, 121.7, 116.7, 112.1, 110.3, 102.7, 101.0, 56.0, 45.7, 34.5, 26.0; **HRMS** (ESI/TOF-Q) m/z: [M+H]<sup>+</sup> Calculated for C<sub>22</sub>H<sub>21</sub>N<sub>3</sub>O<sub>2</sub>H<sup>+</sup> 360.1707; Found 360.1712.

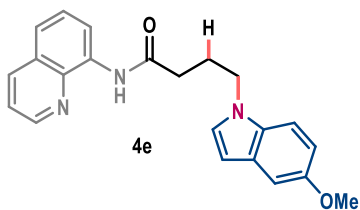

#### 4-(6-fluoro-1H-indol-1-yl)-N-(quinolin-8-yl)butanamide (4f):

Compound **4f** was synthesized according to GP-2 as colorless gummy liquid; eluent (25% ethyl acetate in hexane); **Yield:** 56% (39 mg); **<sup>1</sup>H NMR (500 MHz, CDCl<sub>3</sub>)** δ 9.78 (brs, 1H), 8.78 (d, *J* = 5.7 Hz, 2H), 8.18 (d, *J* = 8.3 Hz, 1H), 7.58 – 7.50 (m, 3H), 7.48 – 7.45 (m, 1H), 7.15 – 7.14 (m, 1H), 7.09 (d, *J* = 10.1 Hz, 1H), 6.87 – 6.82 (m, 1H), 6.49 – 6.48 (m, 1H), 4.26 – 4.23 (m, 2H), 2.56 – 2.53 (m, 2H), 2.37 – 2.31 (m, 2H); **<sup>13</sup>C NMR (126 MHz, CDCl<sub>3</sub>)** δ 170.5, 159.9 (d, *J* = 237.5 Hz), 148.1, 138.2, 136.8, 136.2 (d, *J* = 11.9 Hz), 134.3, 128.44, 128.41, 128.1, 127.6, 125.2, 121.78 (d, *J* = 9.7 Hz), 121.75 (d, *J* = 10.1 Hz), 117.0, 108.3 (d, *J* = 24.6 Hz), 101.7, 96.0 (d, *J* = 26.4 Hz), 45.7, 34.4, 25.7; **<sup>19</sup>F NMR (471 MHz, CDCl<sub>3</sub>)** δ -120.98; **HRMS** (ESI/TOF-Q) m/z: [M+H]<sup>+</sup> Calculated for C<sub>21</sub>H<sub>18</sub>FN<sub>3</sub>OH<sup>+</sup> 348.1507; Found 348.1509.

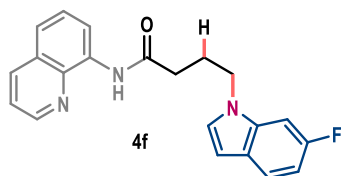

#### 4-(4-chloro-1H-indol-1-yl)-N-(quinolin-8-yl)butanamide (4g):

Compound **4g** was synthesized according to GP-2 as pale yellow gummy liquid; eluent (25% ethyl acetate in hexane); **Yield:** 71% (52 mg); **<sup>1</sup>H NMR (500 MHz, CDCl<sub>3</sub>)** δ 9.72 (brs, 1H), 8.78 – 8.74 (m, 2H), 8.18 – 8.15 (m, 1H), 7.57 – 7.51 (m, 2H), 7.47 – 7.44 (m, 1H), 7.32 – 7.30 (m, 1H), 7.21 – 7.20 (m, 1H), 7.08 – 7.06 (m, 2H), 6.62 – 6.61 (m, 1H), 4.33 – 4.30 (m, 2H), 2.54 – 2.50 (m, 2H), 2.38 – 2.32 (m, 2H); **<sup>13</sup>C NMR (126 MHz, CDCl<sub>3</sub>)** δ 170.5, 148.3, 138.4, 137.0, 136.5, 134.4, 128.6, 128.1, 127.52, 127.49, 126.4, 122.3, 121.8 (2xC), 119.3, 116.7, 108.3, 100.2, 45.9, 34.3, 25.9; **HRMS** (ESI/TOF-Q) m/z: [M+H]<sup>+</sup> Calculated for C<sub>21</sub>H<sub>18</sub>ClN<sub>3</sub>OH<sup>+</sup> 364.1211; Found 364.1209.

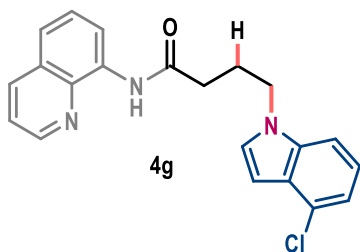

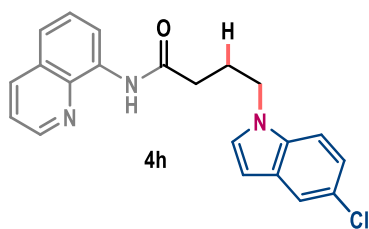

#### 4-(5-chloro-1H-indol-1-yl)-N-(quinolin-8-yl)butanamide (4h):

Compound **4h** was synthesized according to GP-2 as off white gummy liquid; eluent (25% ethyl acetate in hexane); **Yield:** 70% (51 mg); **<sup>1</sup>H NMR (500 MHz, CDCl<sub>3</sub>)** δ 9.73 (brs, 1H), 8.78 – 8.76 (m, 2H), 8.18 – 8.16 (m, 1H), 7.57 (d, *J* = 2.0 Hz, 1H), 7.55 (d, *J* = 7.5 Hz, 1H), 7.52 (dd, *J* = 8.2, 1.7 Hz, 1H), 7.46 (dd, *J* = 8.2, 4.3 Hz, 1H), 7.31 (d, *J* = 8.7 Hz, 1H), 7.18 (d, *J* = 3.1 Hz, 1H), 7.10 – 7.08 (m, 1H), 6.45 – 6.44 (m, 1H), 4.28 (t, *J* = 6.8 Hz, 2H), 2.52 (t, *J* = 7.0 Hz, 2H), 2.36 – 2.31 (m, 2H); **<sup>13</sup>C NMR (126 MHz, CDCl<sub>3</sub>)** δ 170.5, 148.2, 138.2, 136.7, 134.6, 134.3, 129.7, 129.3, 128.1, 127.5, 125.2, 122.0, 121.84, 121.79, 120.4, 116.8, 110.6, 101.2, 45.7, 34.3, 25.9; **HRMS (ESI/TOF-Q)** *m/z*: [M+H]<sup>+</sup> Calculated for C<sub>21</sub>H<sub>18</sub>ClN<sub>3</sub>OH<sup>+</sup> 364.1211; Found 408.177.

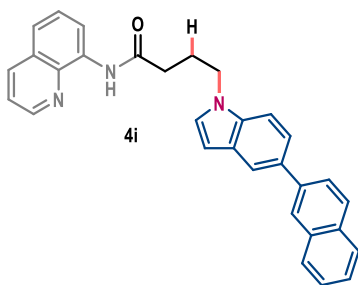

#### 4-(5-(naphthalen-2-yl)-1H-indol-1-yl)-N-(quinolin-8-yl)butanamide (4i):

Compound **4i** was synthesized according to GP-2 as brown sticky liquid; eluent (25% ethyl acetate in hexane); **Yield:** 68% (62 mg); **<sup>1</sup>H NMR (400 MHz, CDCl<sub>3</sub>)** δ 9.80 (brs, 1H), 8.82 – 8.78 (m, 2H), 8.18 – 8.15 (m, 1H), 8.02 – 7.99 (m, 1H), 7.92 – 7.89 (m, 1H), 7.86 – 7.83 (m, 1H), 7.77 – 7.75 (m, 1H), 7.59 – 7.51 (m, 4H), 7.48 – 7.43 (m, 3H), 7.41 – 7.37 (m, 1H), 7.35 – 7.32 (m, 1H), 7.25 (d, *J* = 3.2 Hz, 1H), 6.59 – 6.58 (m, 1H), 4.39 (t, *J* = 6.8 Hz, 2H), 2.61 (t, *J* = 7.0 Hz, 2H), 2.45 (q, *J* = 6.9 Hz, 2H); **<sup>13</sup>C NMR (101 MHz, CDCl<sub>3</sub>)** δ 170.6, 148.3, 141.6, 138.5, 136.6, 135.6, 134.5, 134.0, 132.4, 132.2, 128.8, 128.7, 128.3, 128.1, 127.6, 127.4, 127.1, 126.8, 125.8, 125.7, 125.5, 124.4, 122.5, 121.8 (2xC), 116.7, 109.2, 101.7, 45.8, 34.6, 26.0; **HRMS (ESI/TOF-Q)** *m/z*: [M+H]<sup>+</sup> Calculated for C<sub>31</sub>H<sub>25</sub>N<sub>3</sub>OH<sup>+</sup> 456.2070; Found 456.2076.

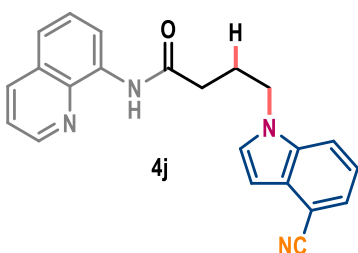

#### 4-(4-cyano-1H-indol-1-yl)-N-(quinolin-8-yl)butanamide (4j):

Compound **4j** was synthesized according to GP-2 as gummy liquid; eluent (30% ethyl acetate in hexane); **Yield:** 51% (36 mg); **<sup>1</sup>H NMR (400 MHz, CDCl<sub>3</sub>)** δ 9.84 (brs, 1H), 8.80 – 8.76 (m, 2H), 8.25 (d, *J* = 8.2 Hz, 1H), 7.67 – 7.64 (m, 1H), 7.61 – 7.55 (m, 2H), 7.53 – 7.50 (m, 1H), 7.42 – 7.40 (m, 1H), 7.35 – 7.34 (m, 1H), 7.20 – 7.15 (m, 1H), 6.72 – 6.70 (m, 1H), 4.39 – 4.35 (m, 2H), 2.58 (t, *J* = 6.9 Hz, 2H), 2.36 (p, *J* = 6.9 Hz, 2H); **<sup>13</sup>C NMR (101 MHz, CDCl<sub>3</sub>)** δ 170.2, 148.4, 138.4, 136.6, 135.9, 134.3, 130.7, 130.0, 128.1, 127.5, 125.1, 121.92, 121.86, 121.3, 118.9, 116.7, 114.4, 103.4, 100.7, 45.8, 34.1, 25.9; **HRMS (ESI/TOF-Q)** *m/z*: [M+H]<sup>+</sup> Calculated for C<sub>22</sub>H<sub>18</sub>N<sub>4</sub>OH<sup>+</sup> 355.1553; Found 355.1557.

#### 4-(5-nitro-1H-indol-1-yl)-N-(quinolin-8-yl)butanamide (4k):

Compound **4k** was synthesized according to GP-2 as off white gummy liquid; eluent (35% ethyl acetate in hexane); **Yield:** 55% (41 mg) **<sup>1</sup>H NMR (500 MHz, CDCl<sub>3</sub>)** δ 9.76 (brs, 1H), 8.76 – 8.74 (m, 2H), 8.53 (d, *J* = 2.2 Hz, 1H), 8.22 – 8.20

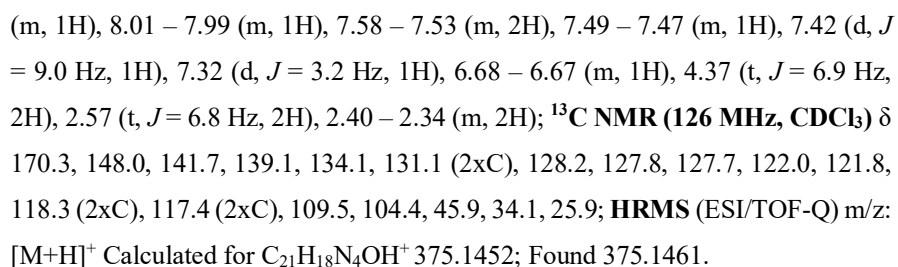

Compound **5** was synthesized as off white sticky solid; eluent (15% ethyl acetate in hexane); **Yield:** 86% (71 mg); **<sup>1</sup>H NMR (500 MHz, CDCl<sub>3</sub>)** δ 7.64 – 7.62 (m, 1H), 7.39 (d, *J* = 8.3 Hz, 1H), 7.22 – 7.18 (m, 1H), 7.17 (d, *J* = 3.2 Hz, 1H), 7.13 – 7.09 (m, 1H), 6.56 (d, *J* = 3.3 Hz, 1H), 4.75 – 4.71 (m, 1H), 4.44 (brs, 1H), 3.65 – 3.60 (m, 1H), 3.37 – 3.31 (m, 1H), 1.53 (d, *J* = 6.9 Hz, 3H), 1.39 (s, 9H); **<sup>13</sup>C NMR (126 MHz, CDCl<sub>3</sub>)** δ 156.1, 136.5, 128.6, 123.8, 121.8, 121.1, 119.7, 109.7, 102.3, 79.8, 51.4, 46.4, 28.4, 18.5; **HRMS** (ESI/TOF-Q) *m/z*: [M+H]<sup>+</sup> Calculated for C<sub>16</sub>H<sub>22</sub>N<sub>2</sub>O<sub>2</sub>H<sup>+</sup> 275.1754; Found 275.1755.

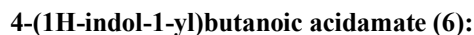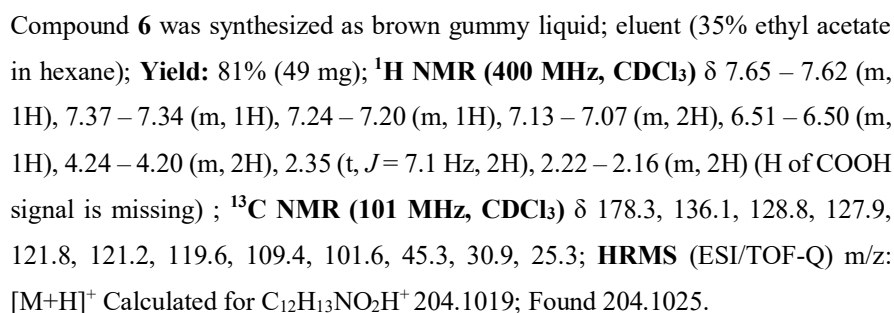

***N*-(2-(2-((triisopropylsilyl)ethynyl)-1H-indol-1-yl)propyl)picolinamide (7):**

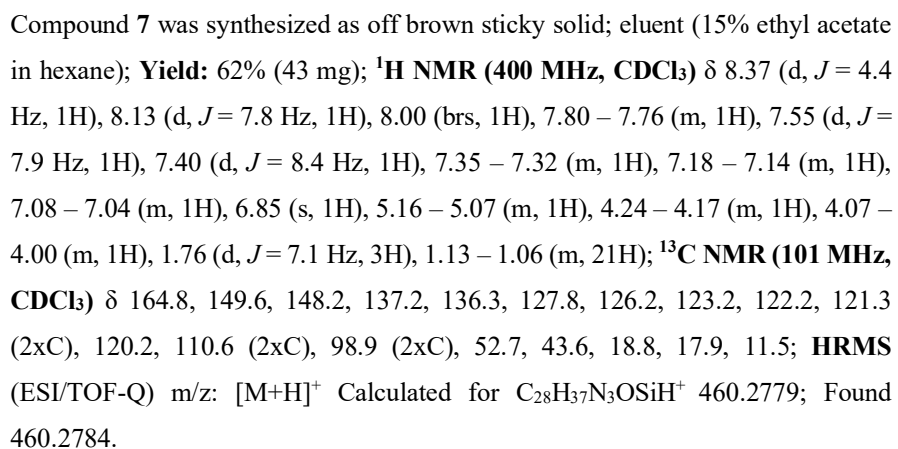

**(S)-3-((1H-indol-1-yl)methyl)-N-(quinolin-8-yl)-5-(triisopropylsilyl)pent-4-ynamide (8):**

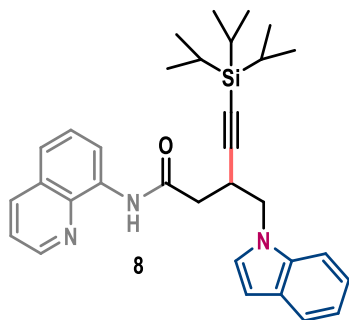

Compound **8** was synthesized as pale yellow liquid; eluent (15% ethyl acetate in hexane); **Yield:** 65% (50 mg); **<sup>1</sup>H NMR (400 MHz, CDCl<sub>3</sub>)** δ 9.80 (brs, 1H), 8.80 – 8.76 (m, 2H), 8.18 – 8.15 (m, 1H), 7.62 – 7.59 (m, 1H), 7.57 – 7.51 (m, 2H), 7.50 – 7.48 (m, 1H), 7.46 – 7.43 (m, 1H), 7.32 (d, *J* = 3.3 Hz, 1H), 7.18 – 7.14 (m, 1H), 7.09 – 7.05 (m, 1H), 6.50 – 6.49 (m, 1H), 4.53 – 4.48 (m, 1H), 4.41 – 4.36 (m, 1H), 3.72 – 3.65 (m, 1H), 2.78 – 2.65 (m, 2H), 0.94 – 0.91 (m, 21H); **<sup>13</sup>C NMR (101 MHz, CDCl<sub>3</sub>)** δ 168.7, 148.2, 138.5, 136.5, 134.4, 128.9, 128.8, 128.0, 127.5, 121.8, 121.76, 121.72, 121.0, 119.6, 116.9, 109.7, 107.5 (2xC), 101.6, 85.0, 49.6, 40.8, 31.5, 18.6, 11.2; **HRMS** (ESI/TOF-Q) *m/z*: [M+H]<sup>+</sup> Calculated for C<sub>32</sub>H<sub>39</sub>N<sub>3</sub>OSiH<sup>+</sup> 510.2935; Found 510.2940.

### 13. NMR spectra of synthesized compounds

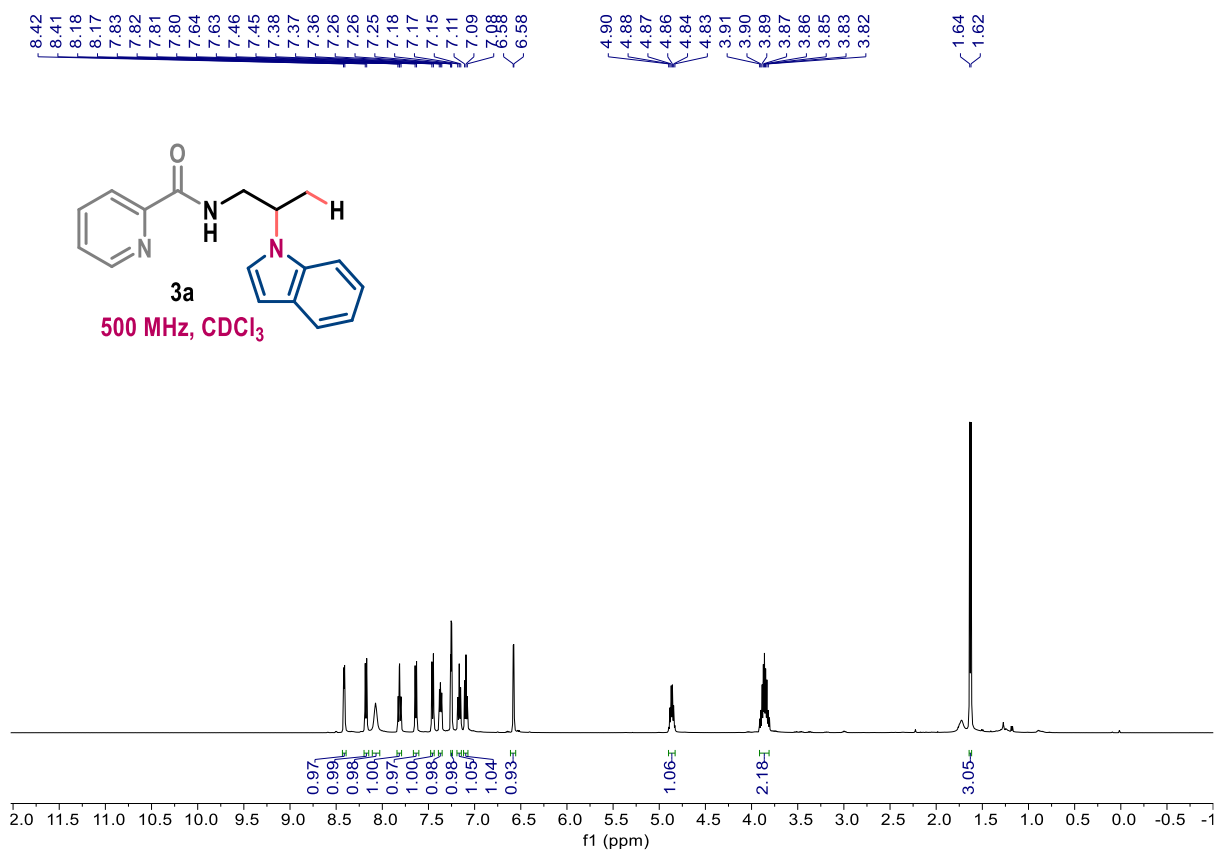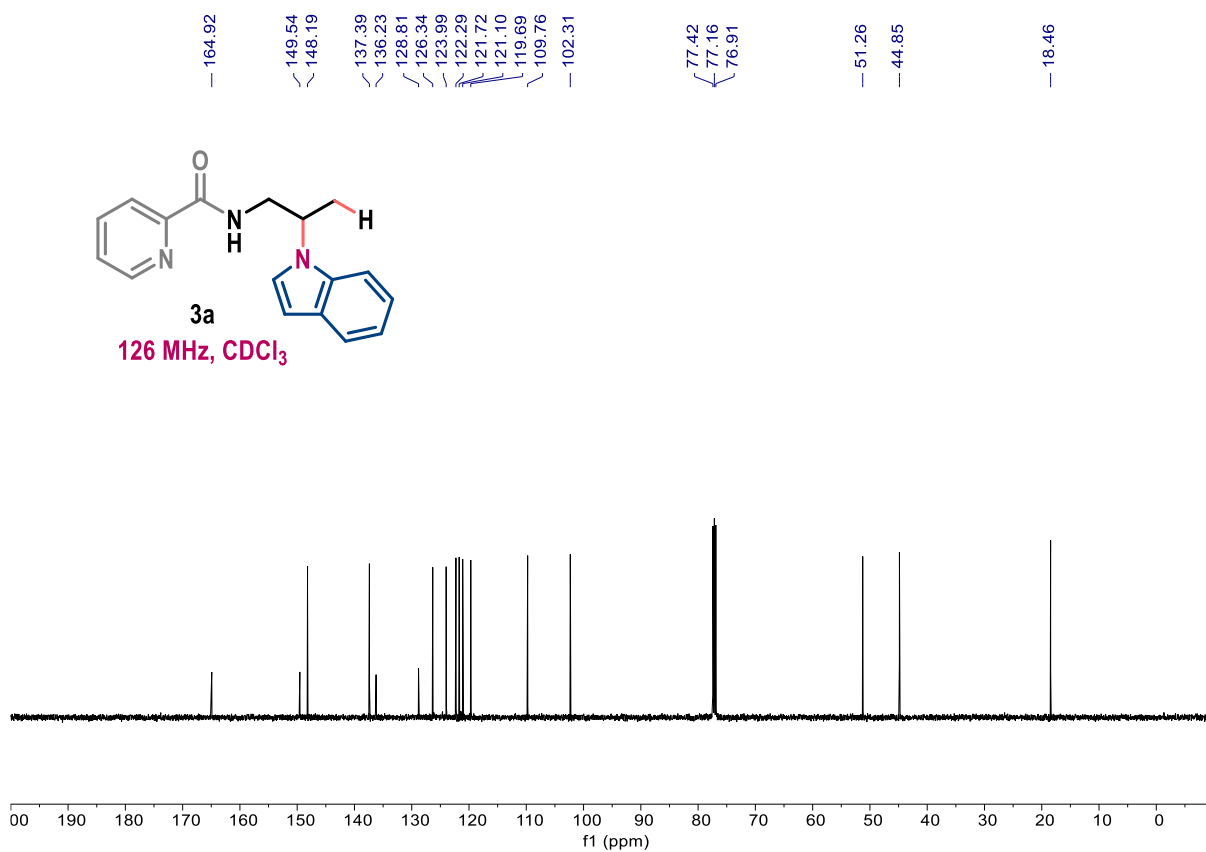

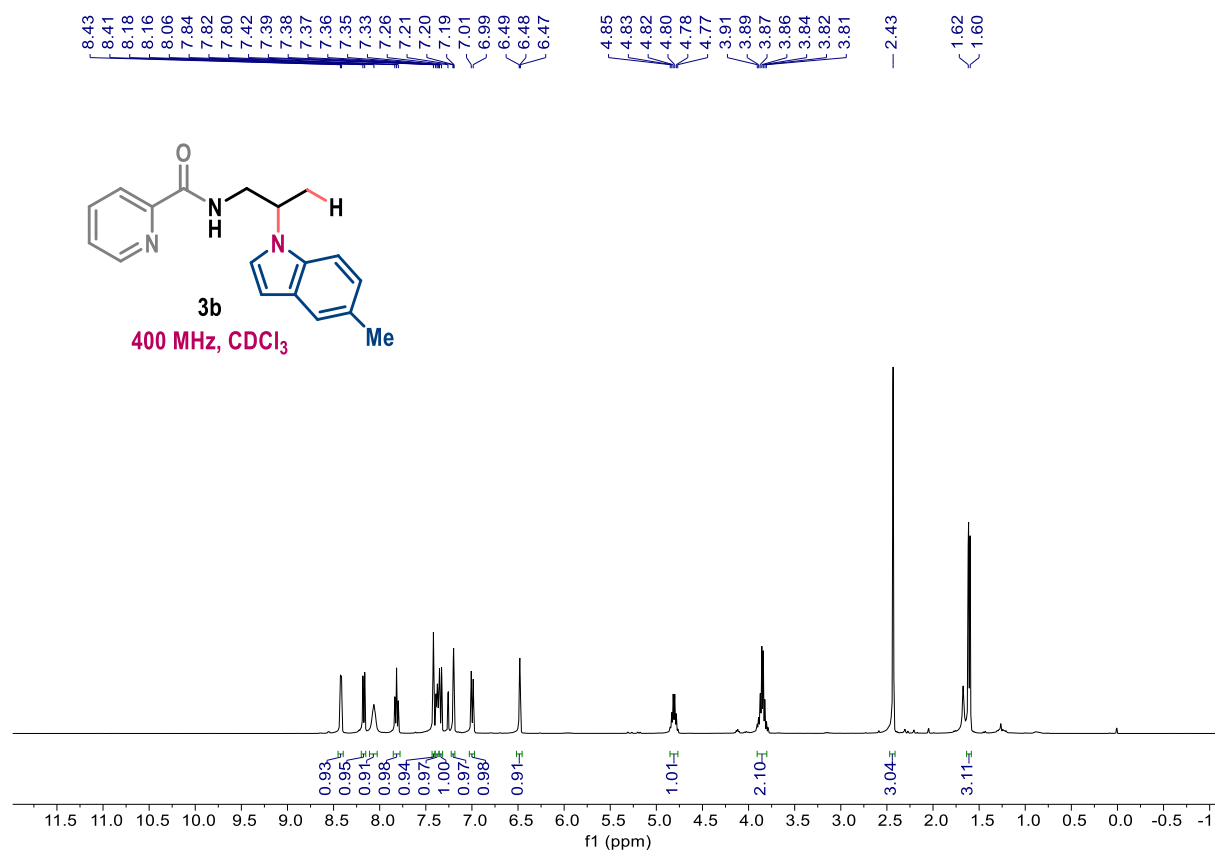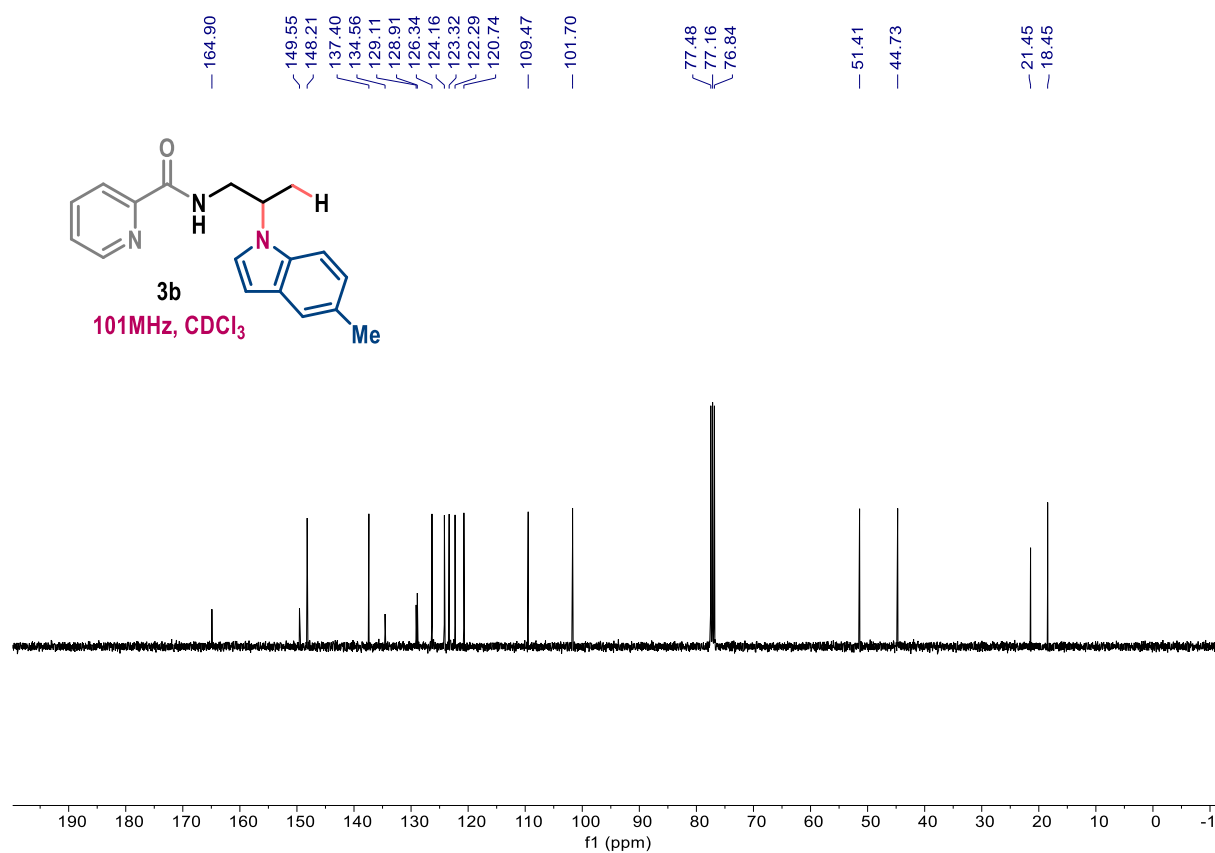

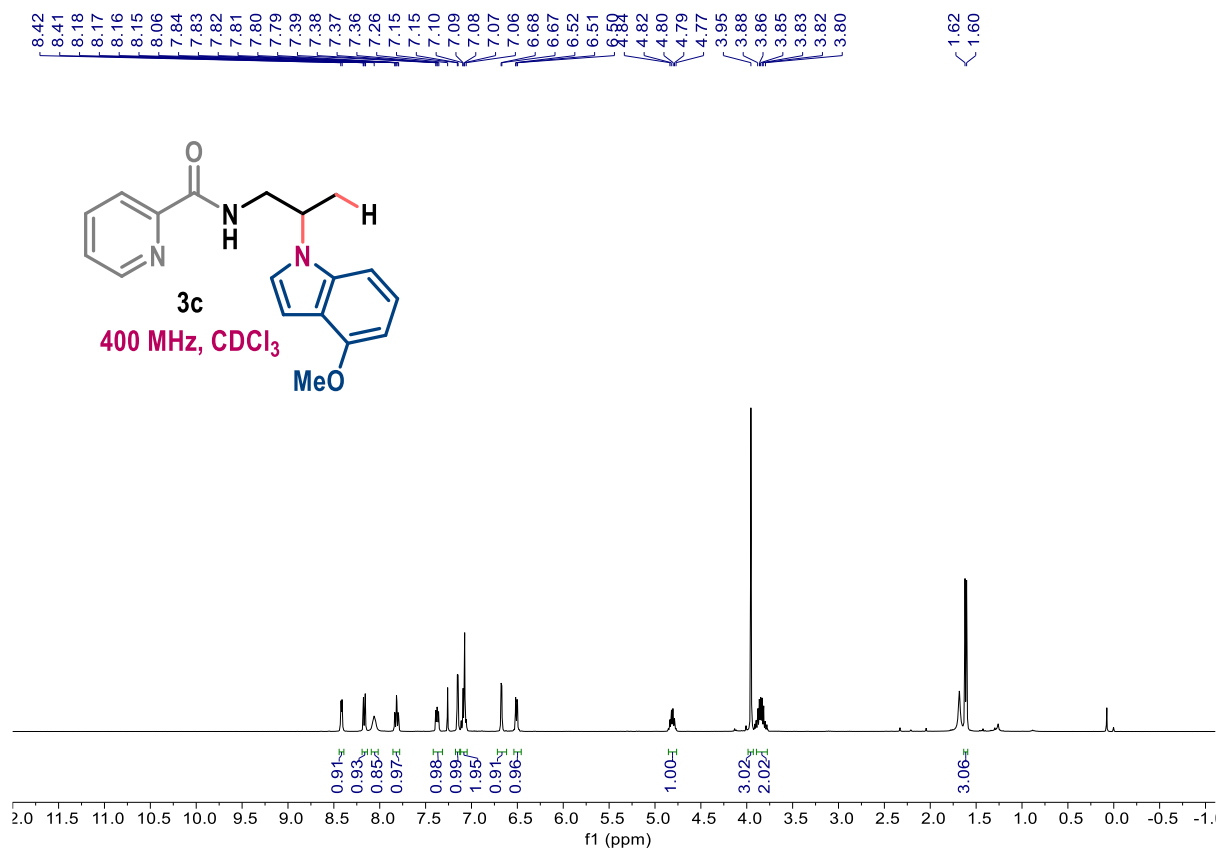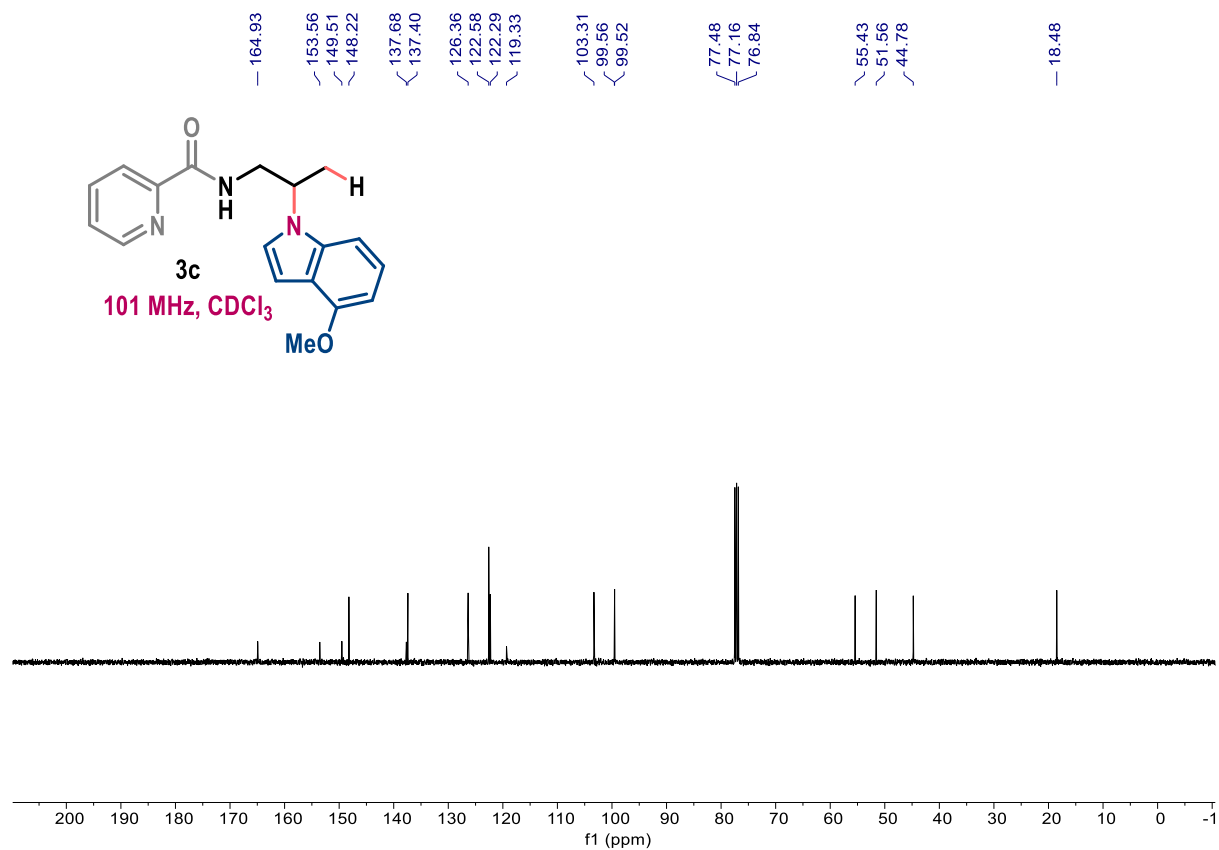

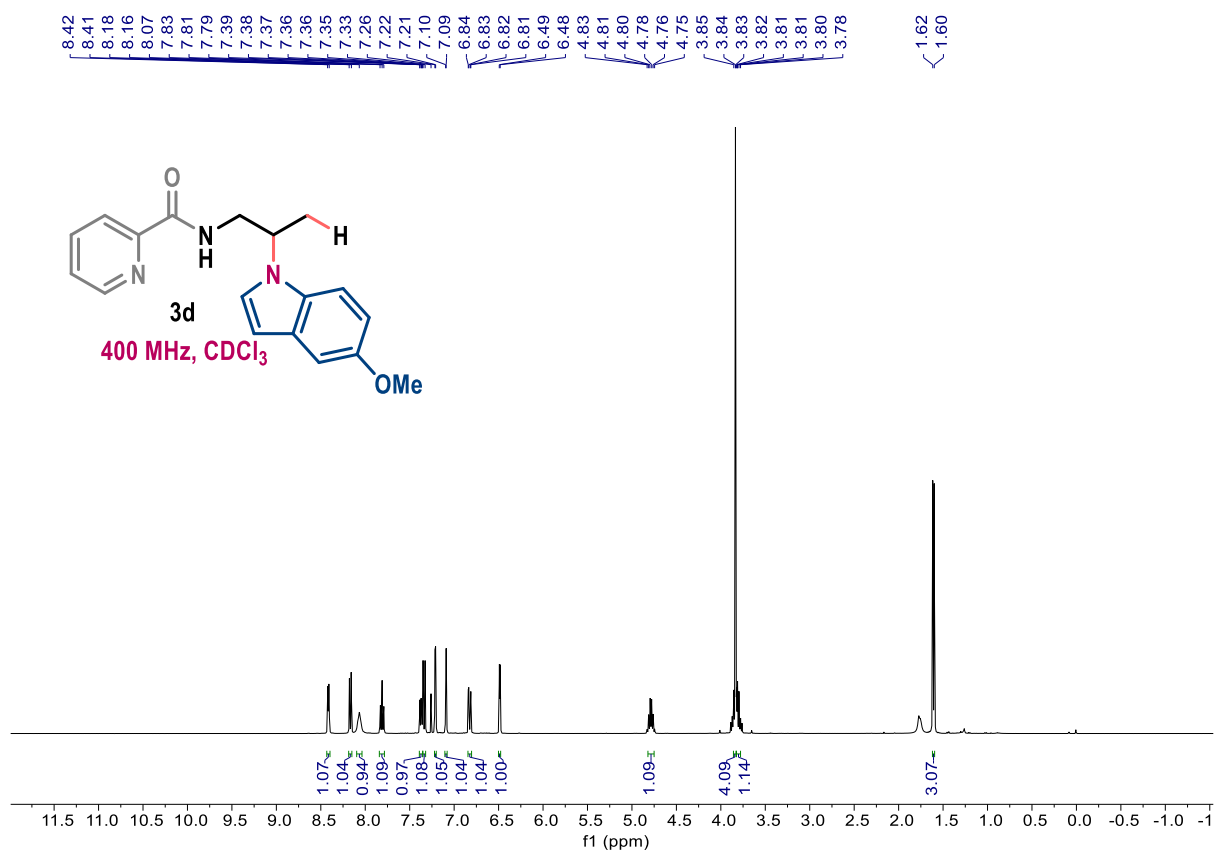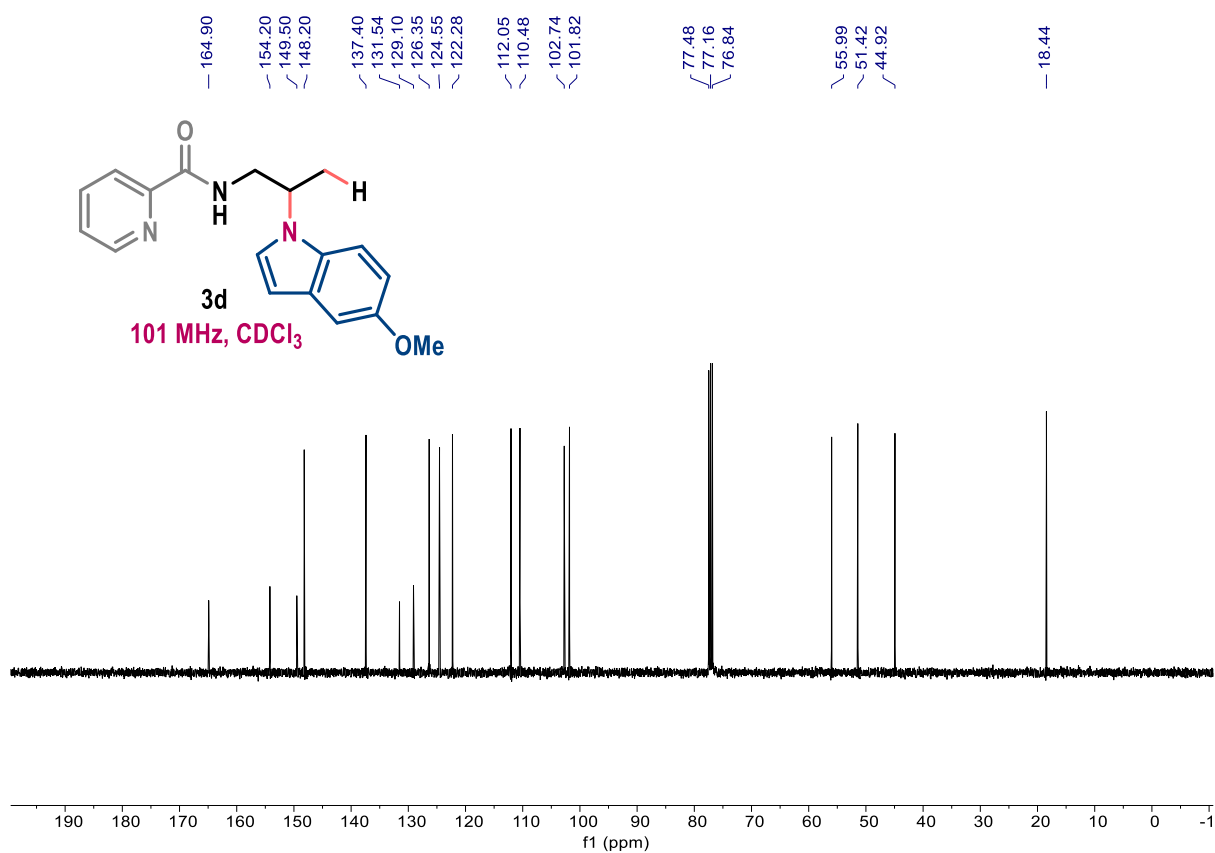



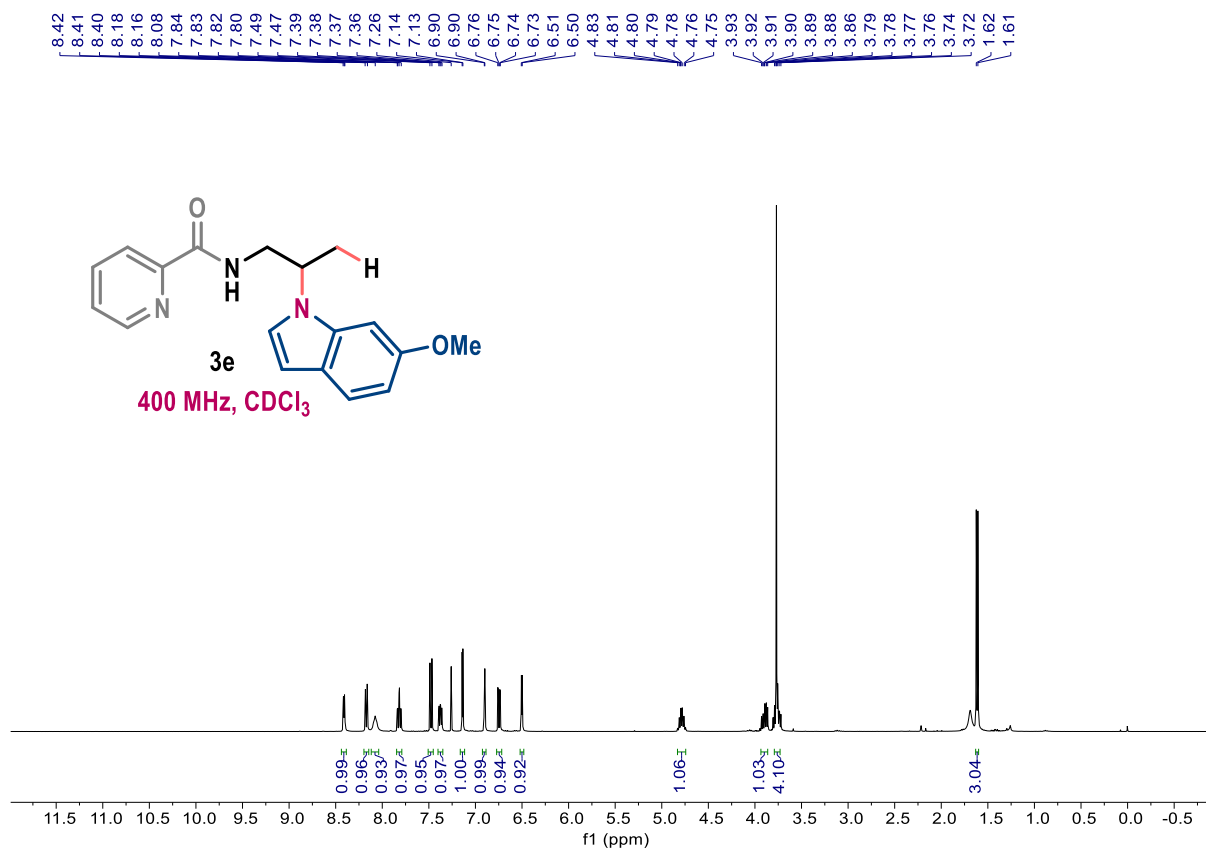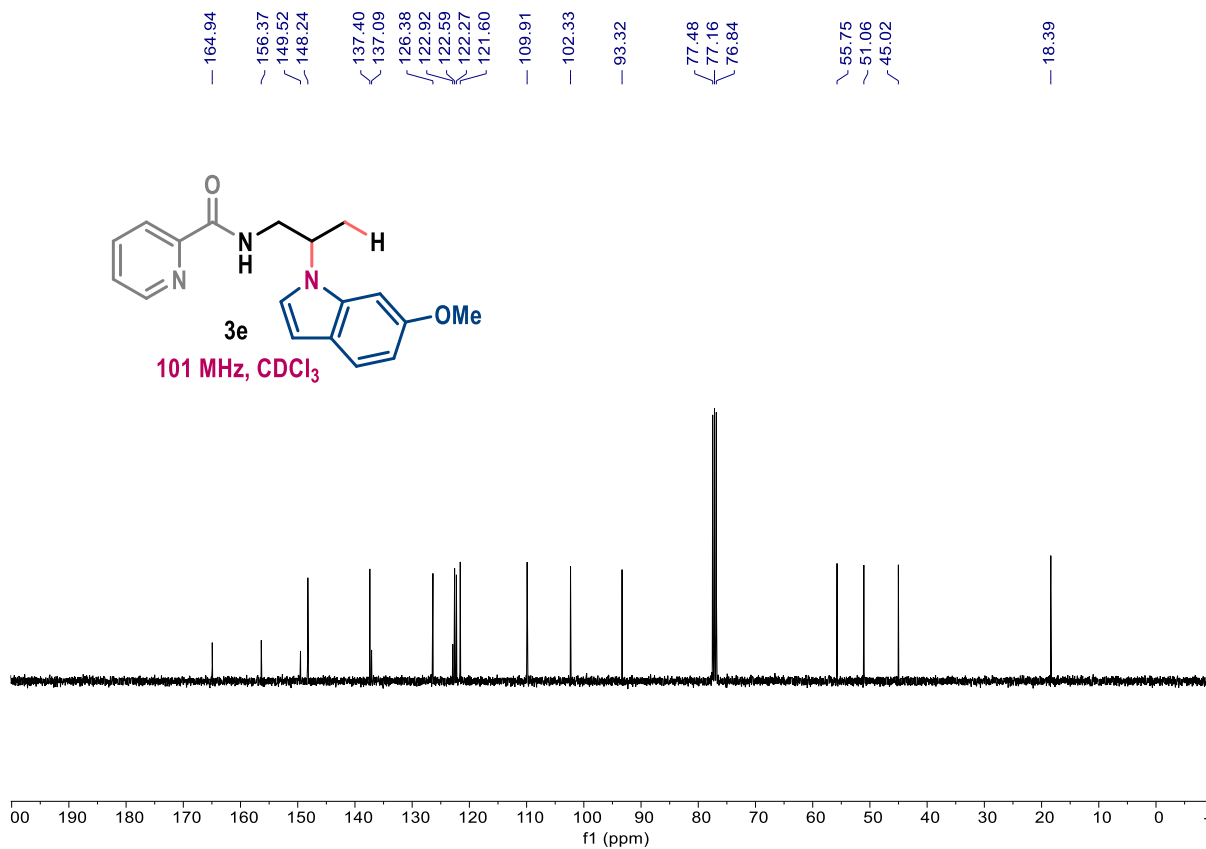

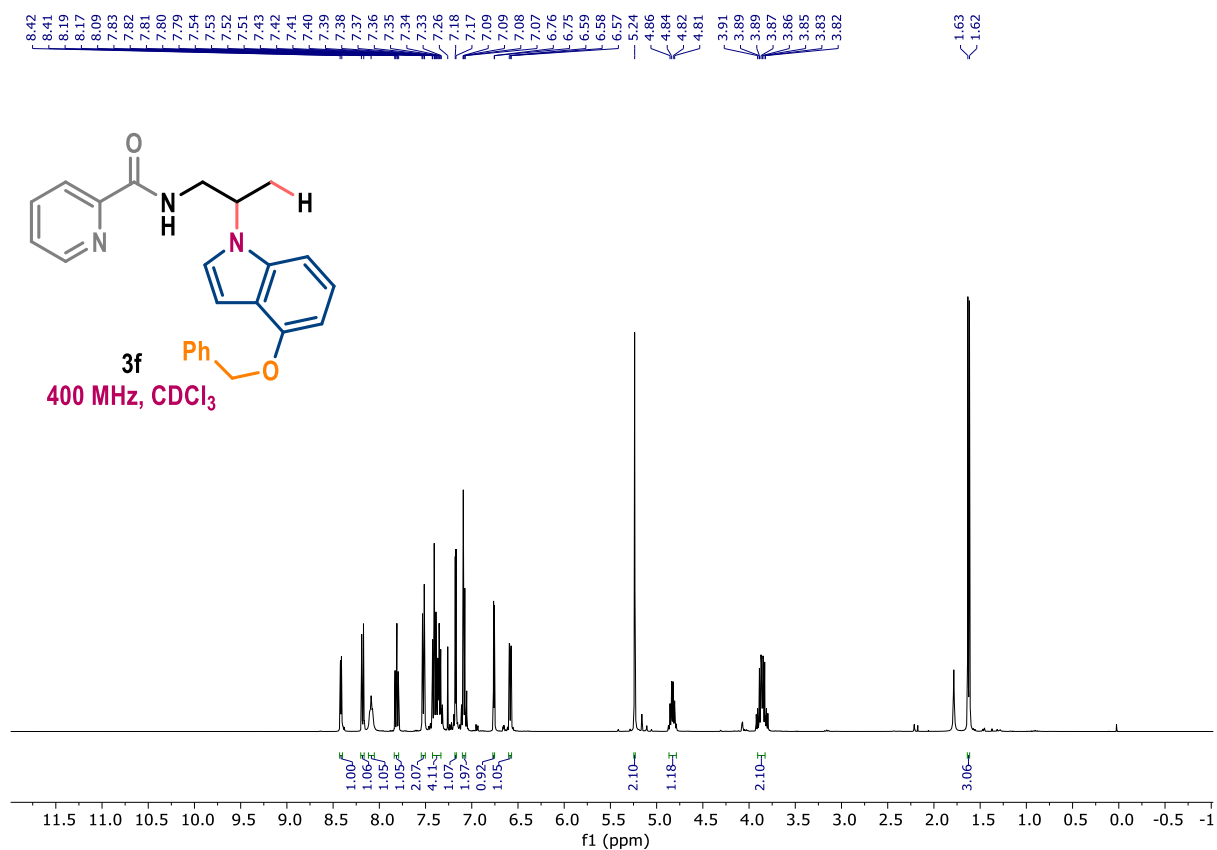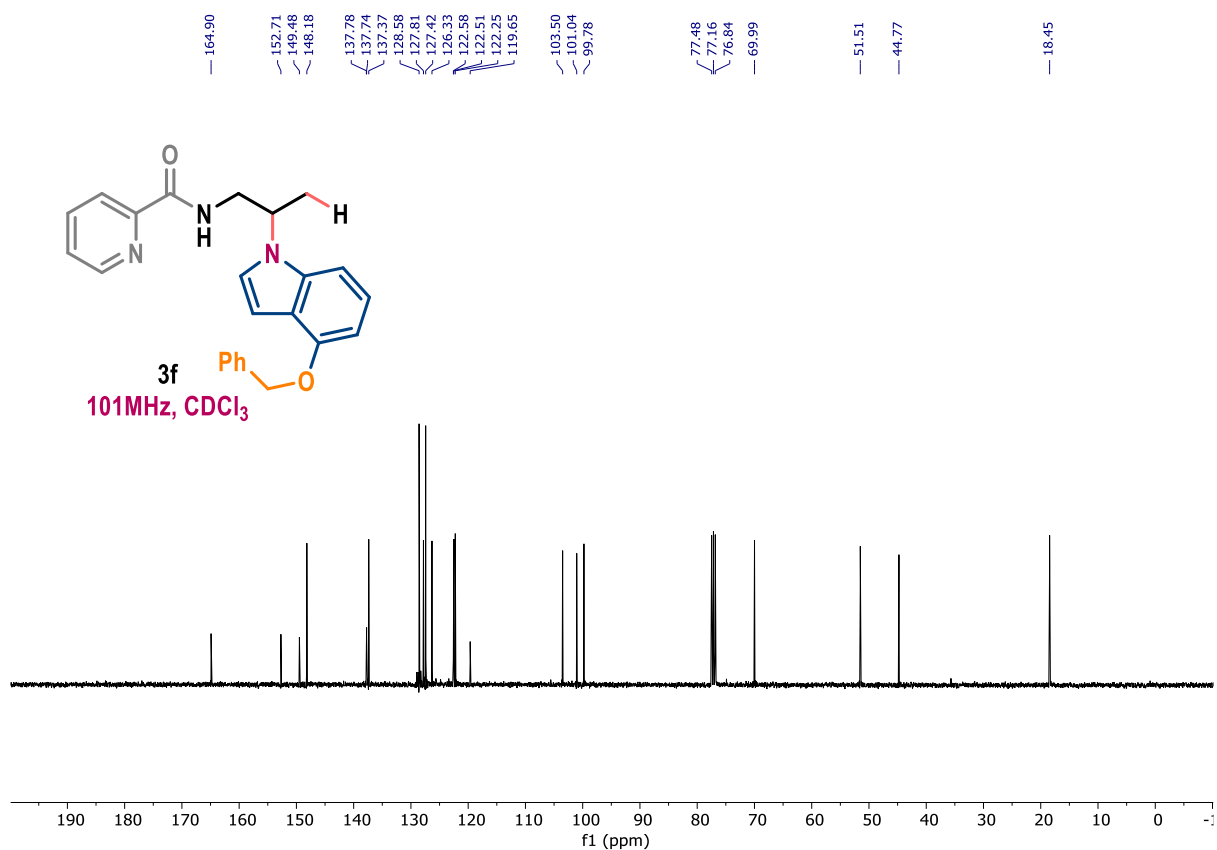

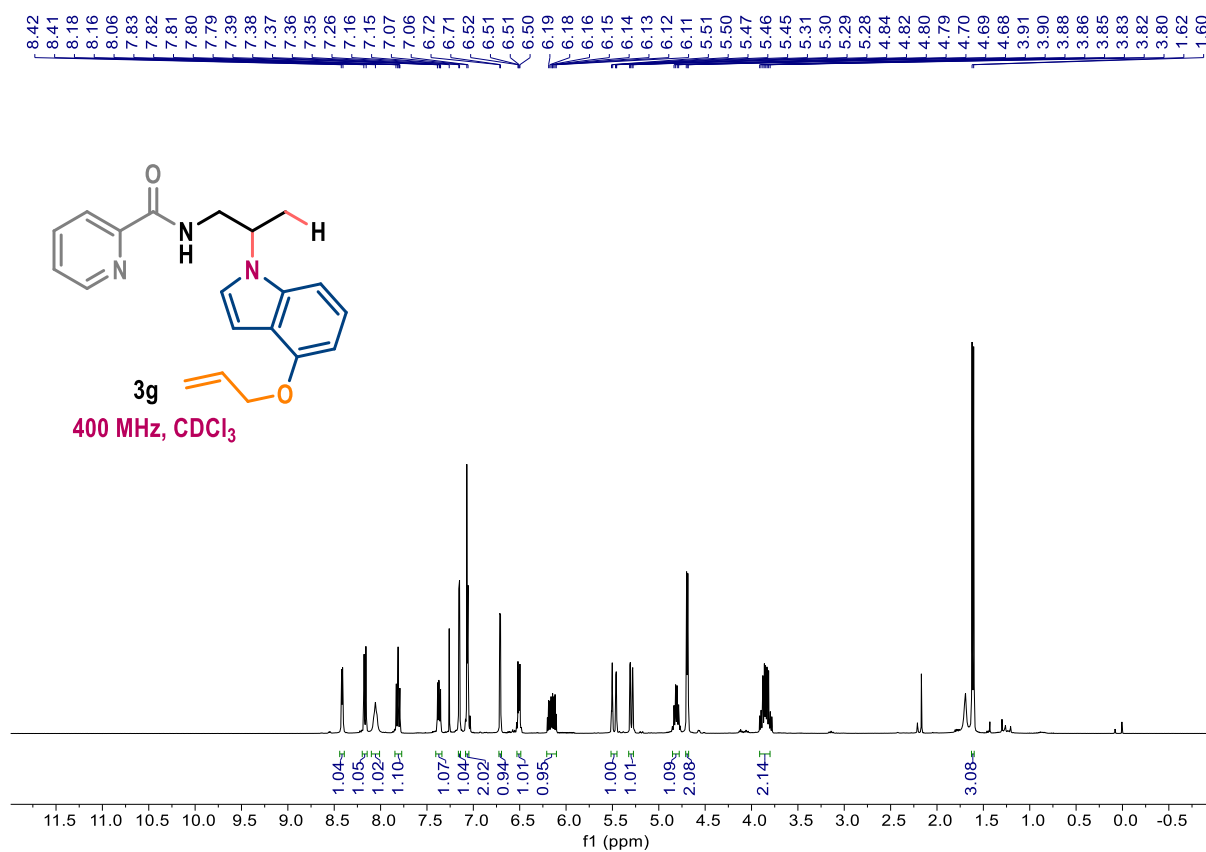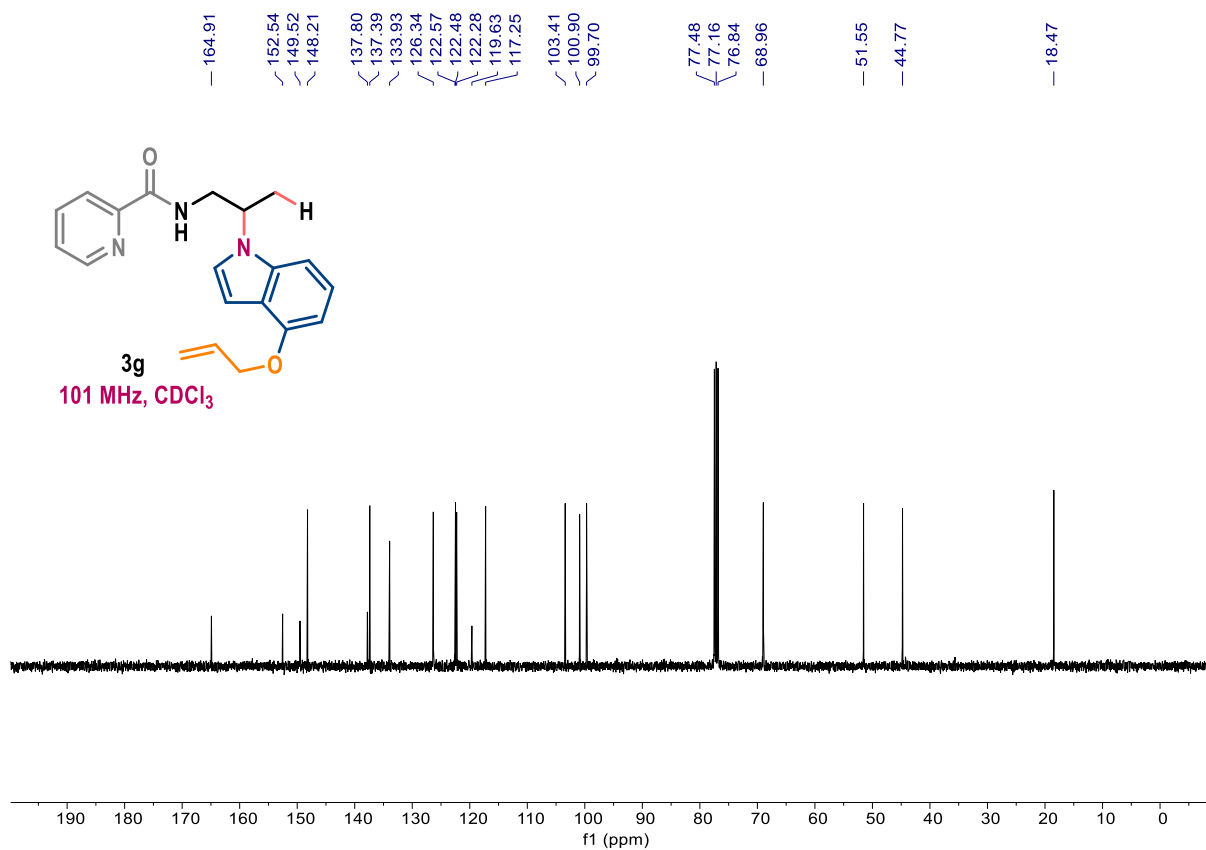

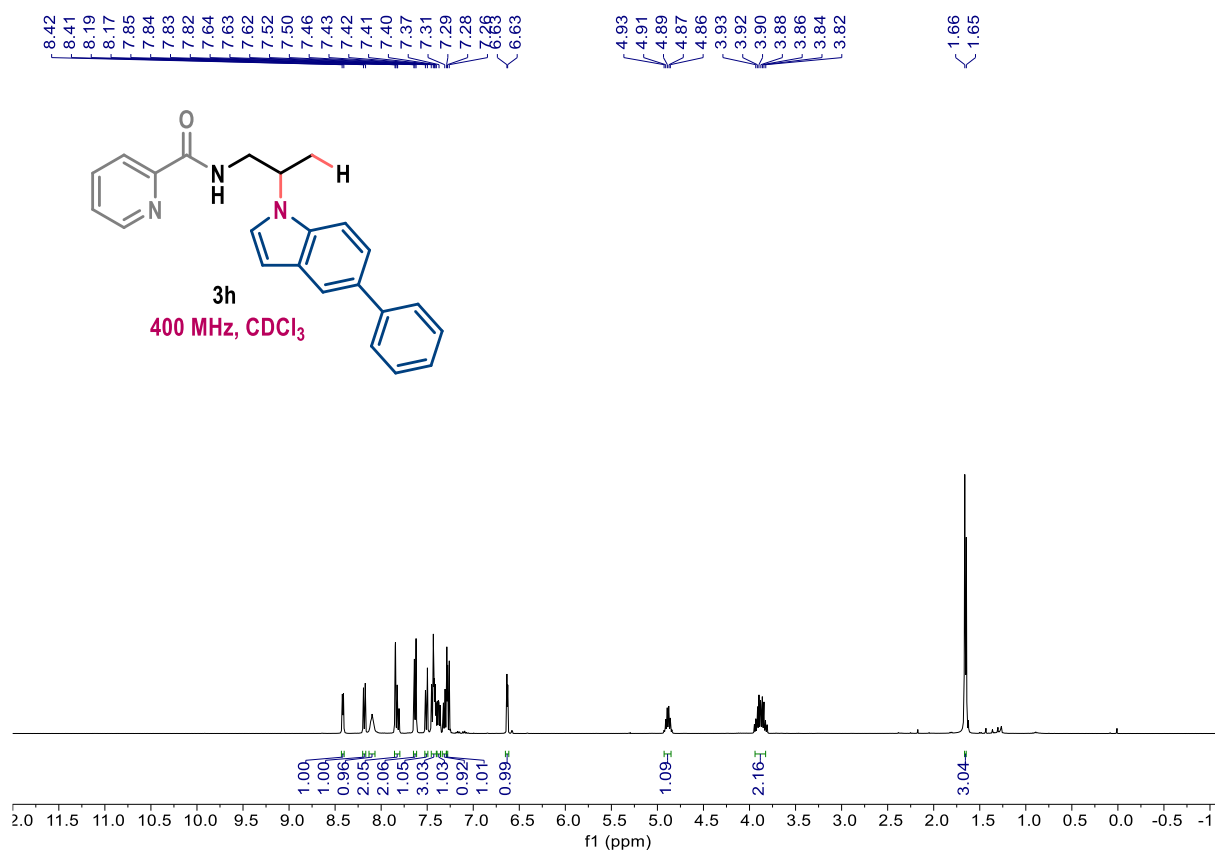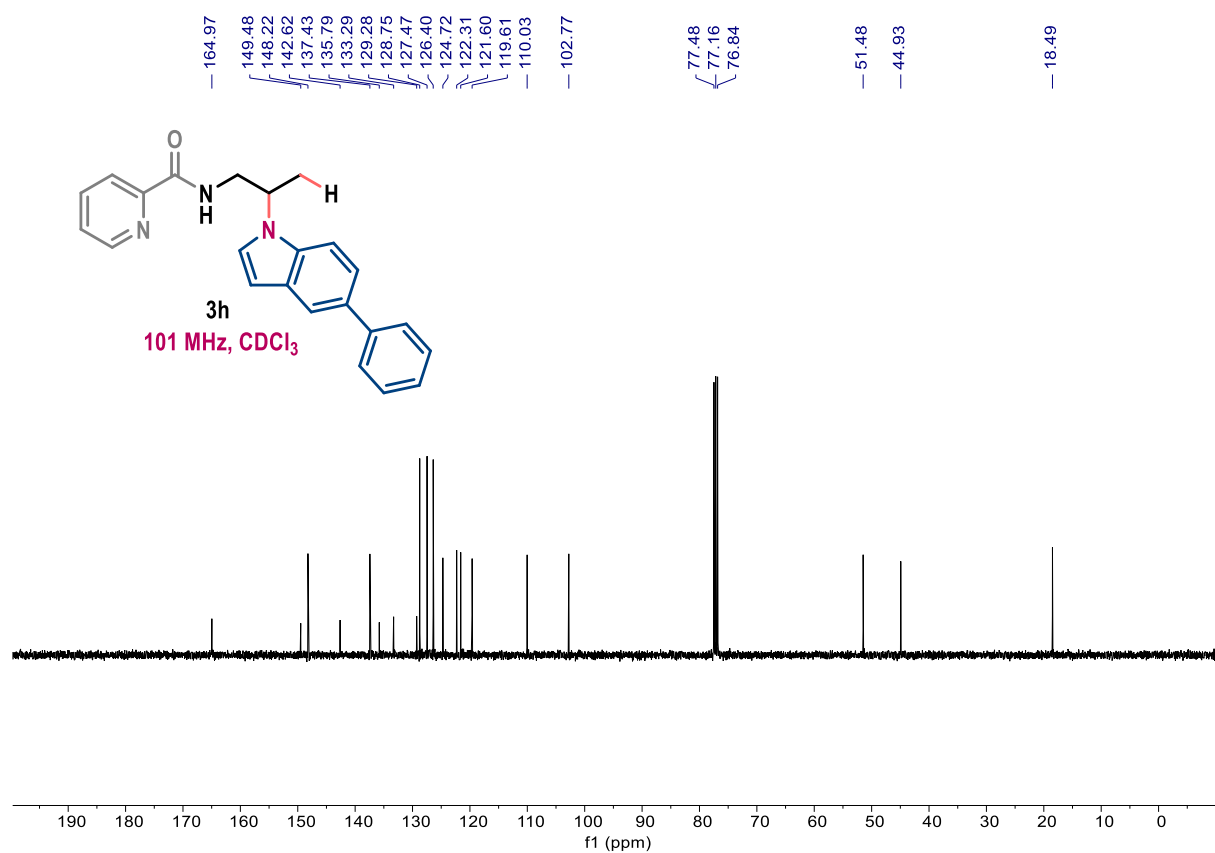

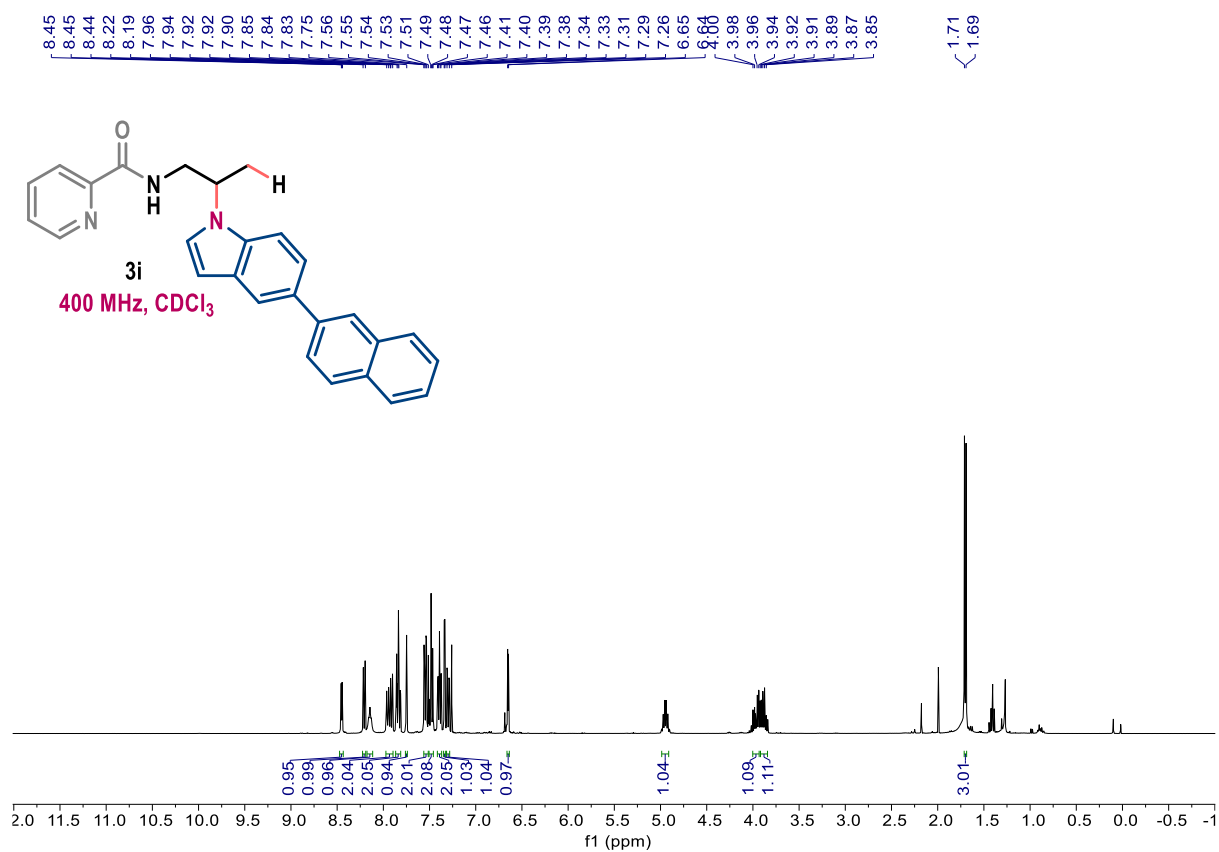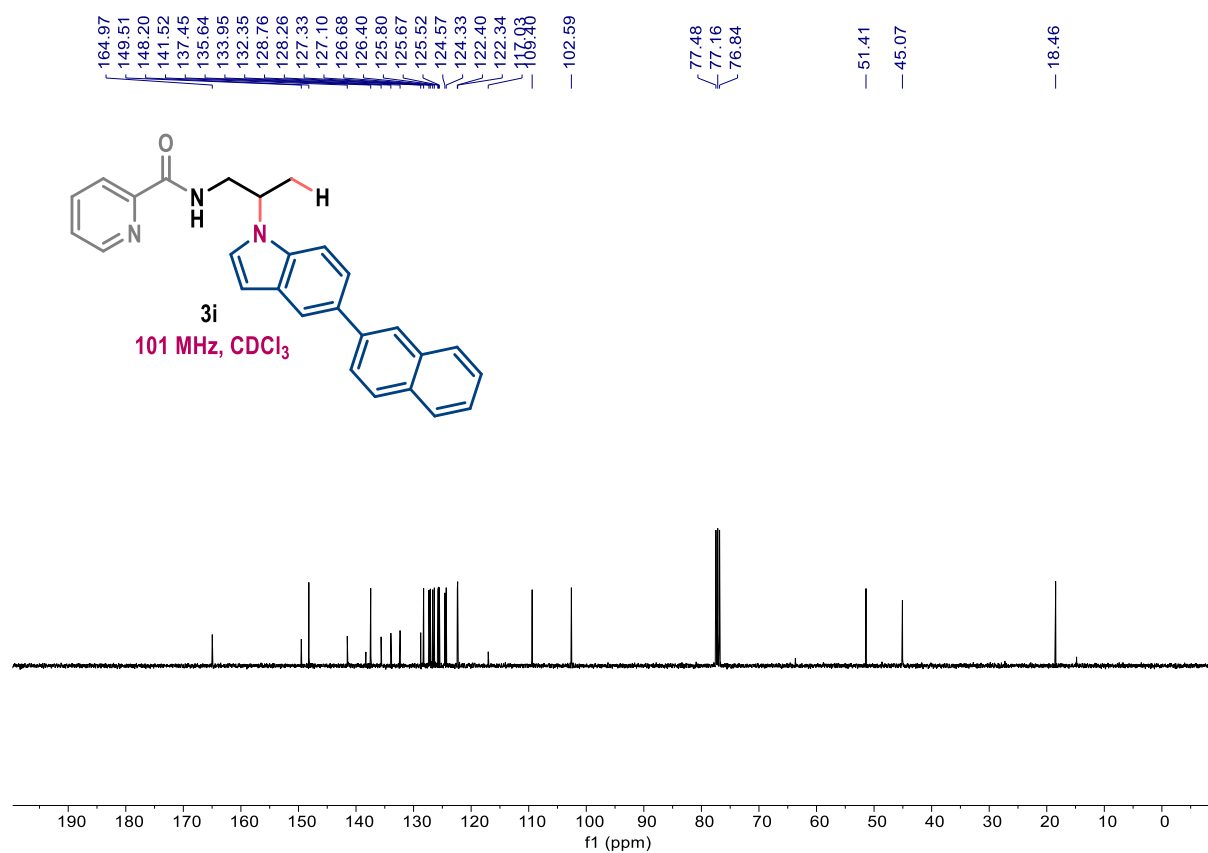

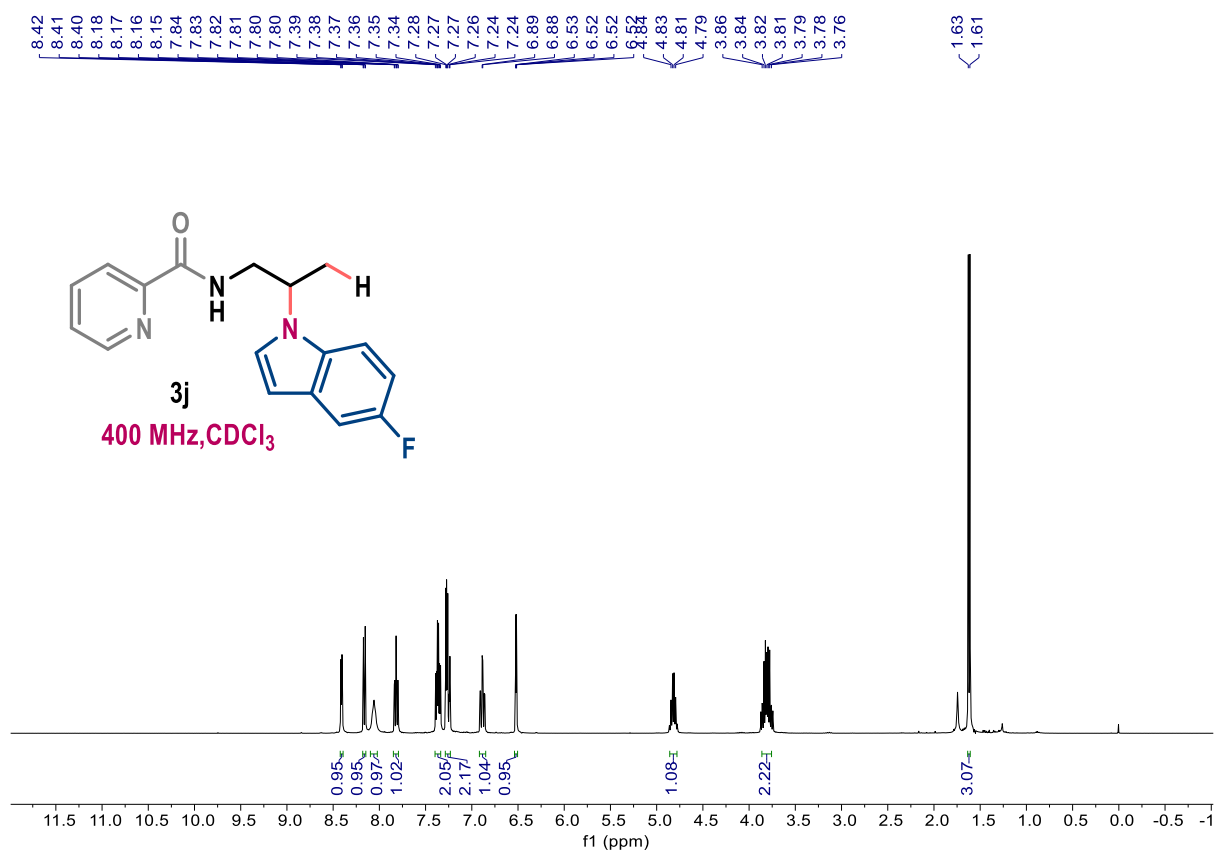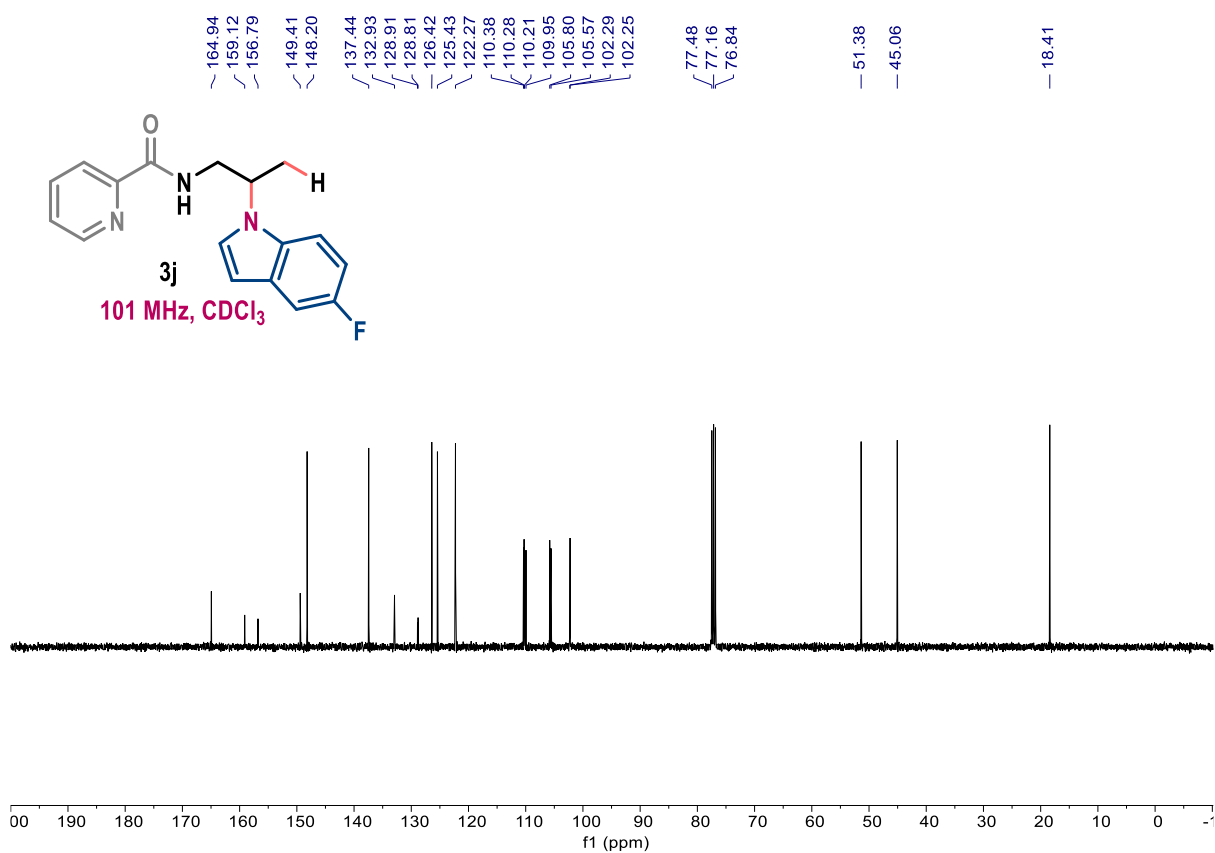

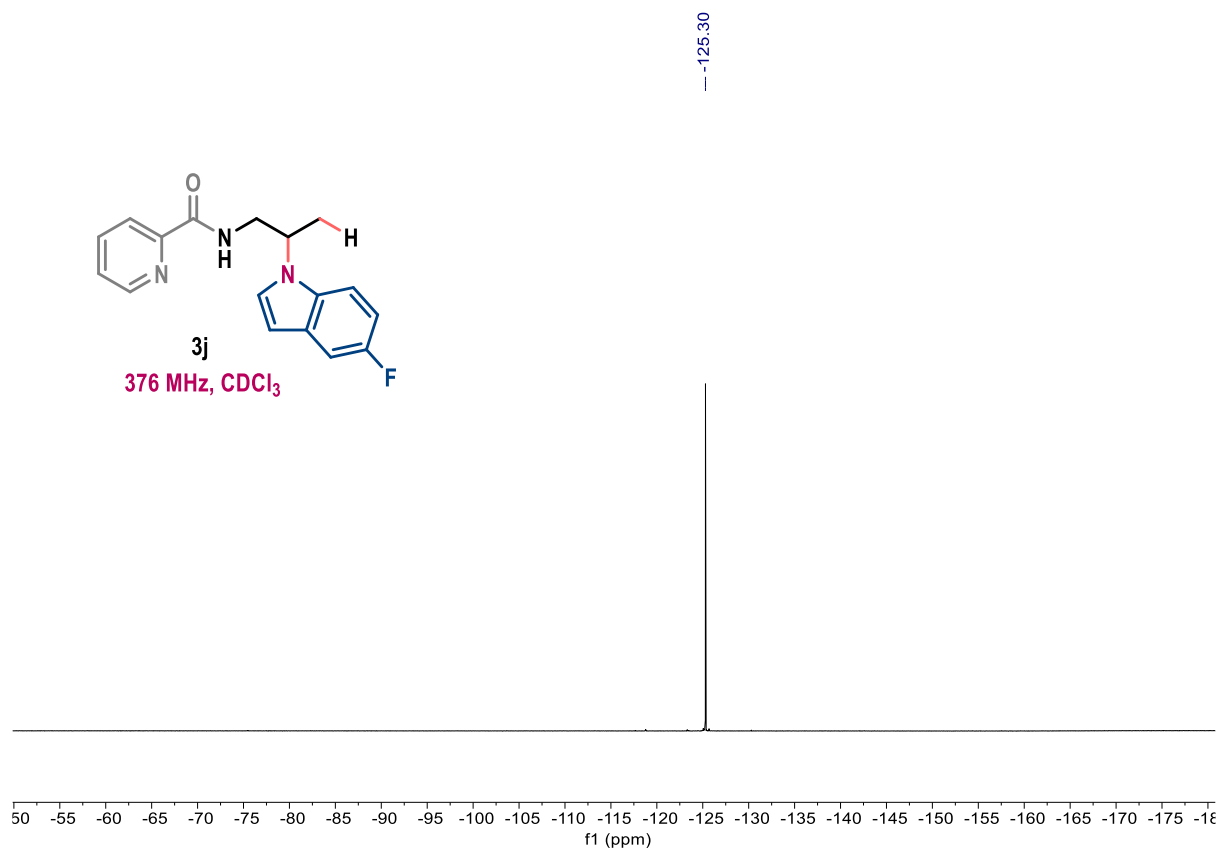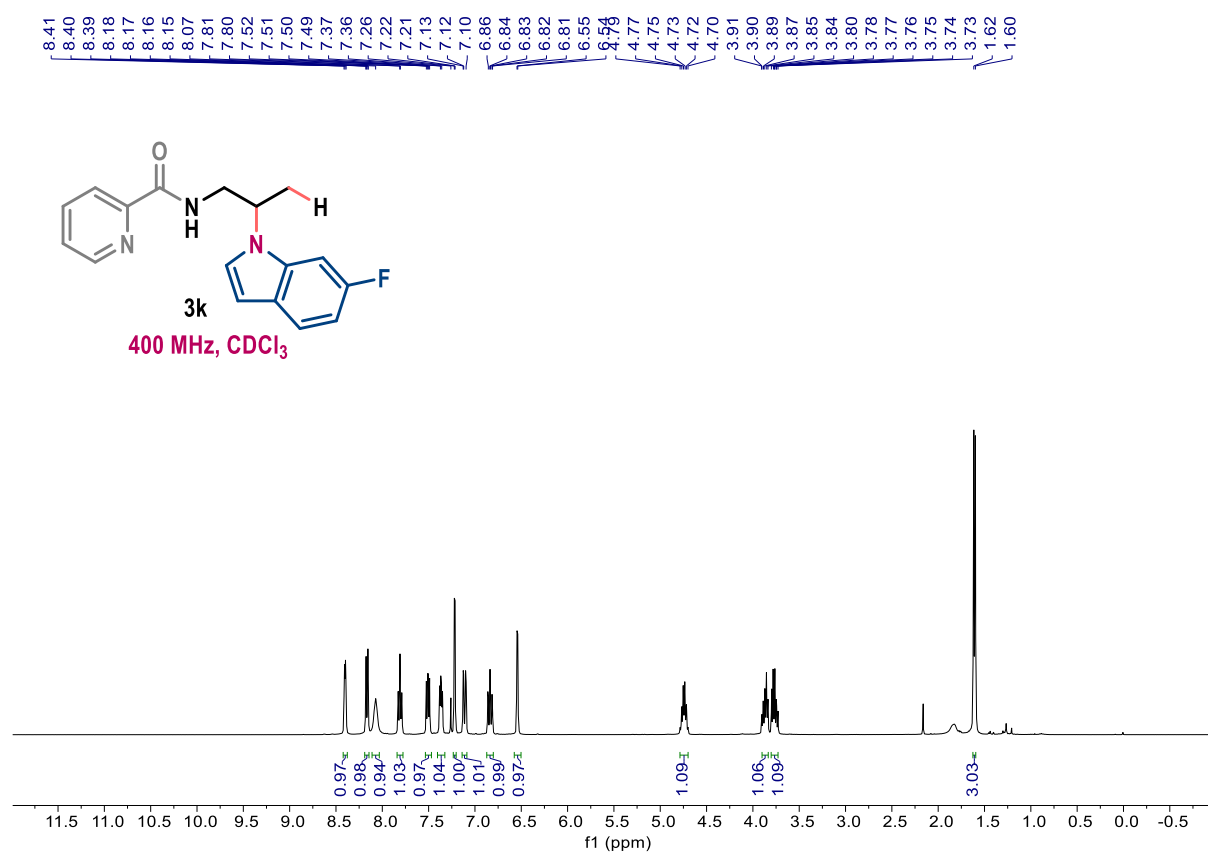

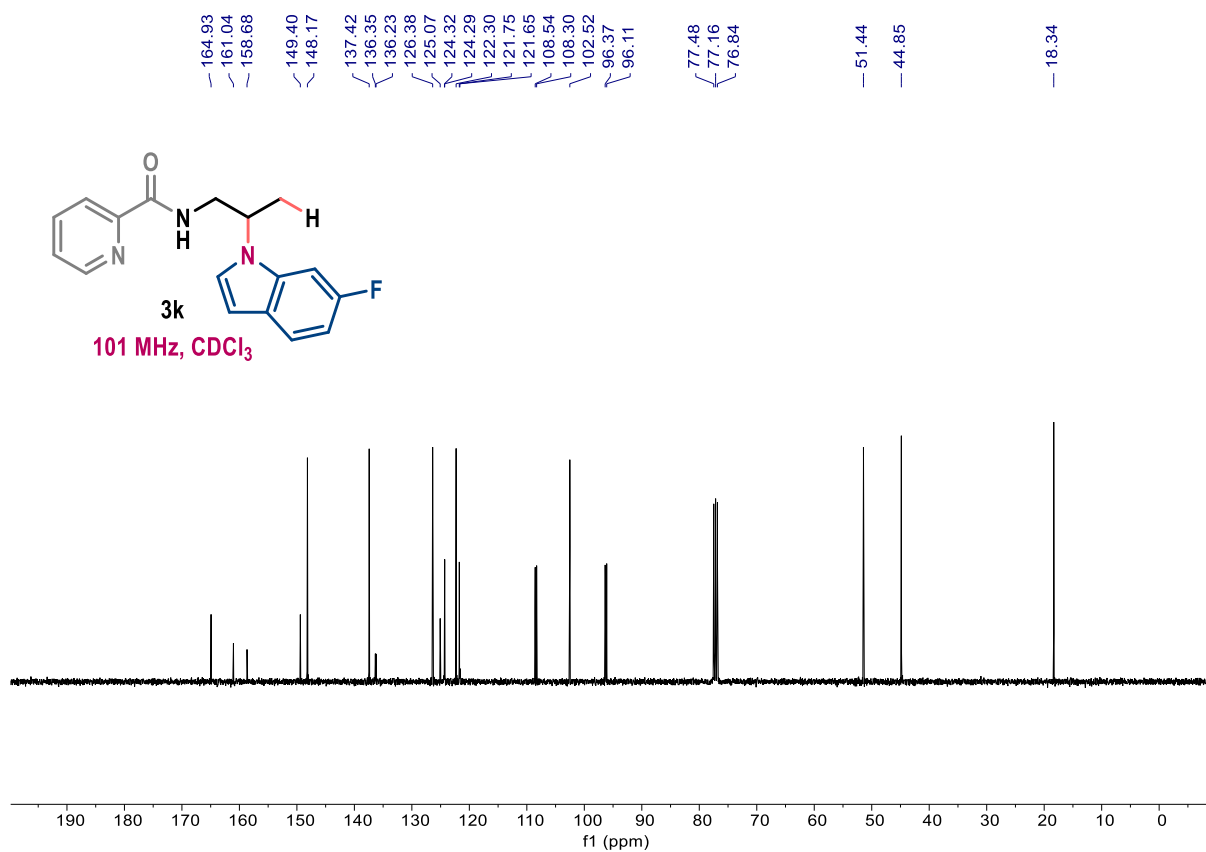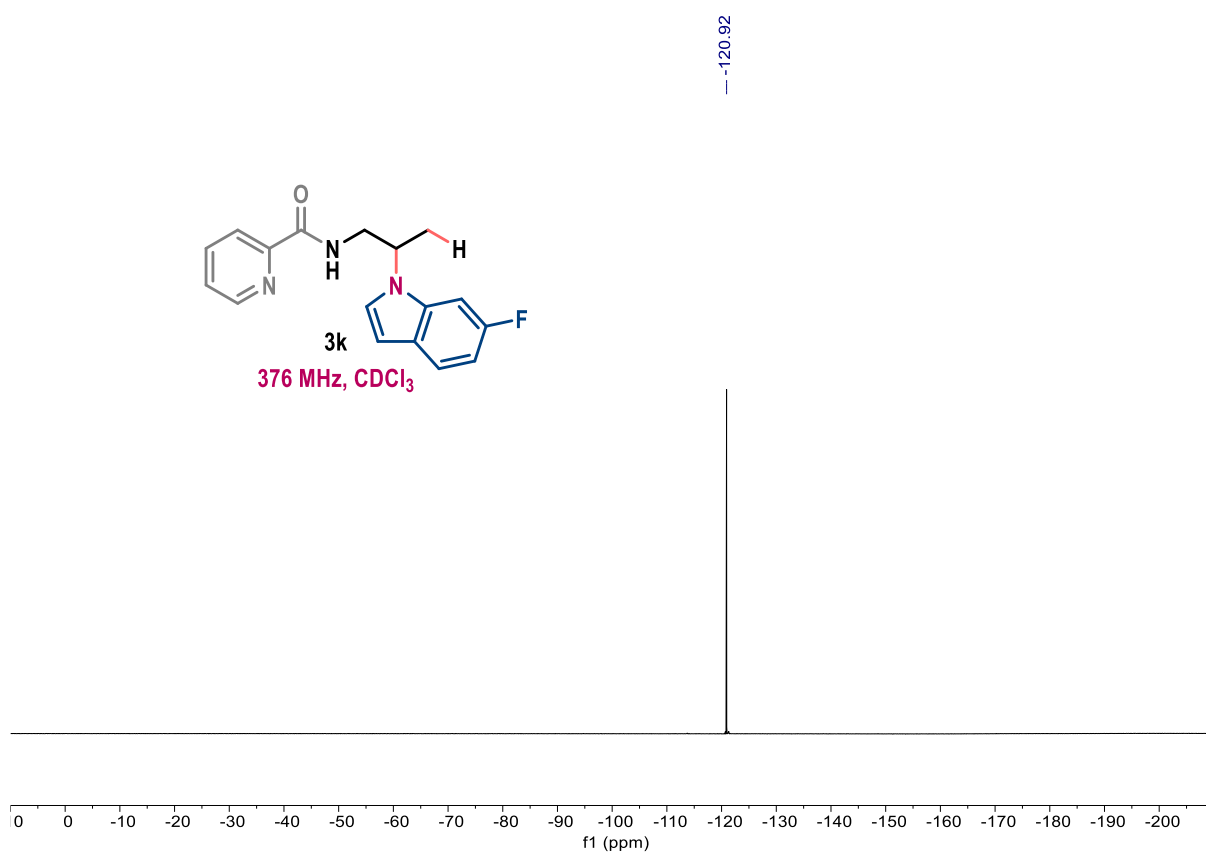



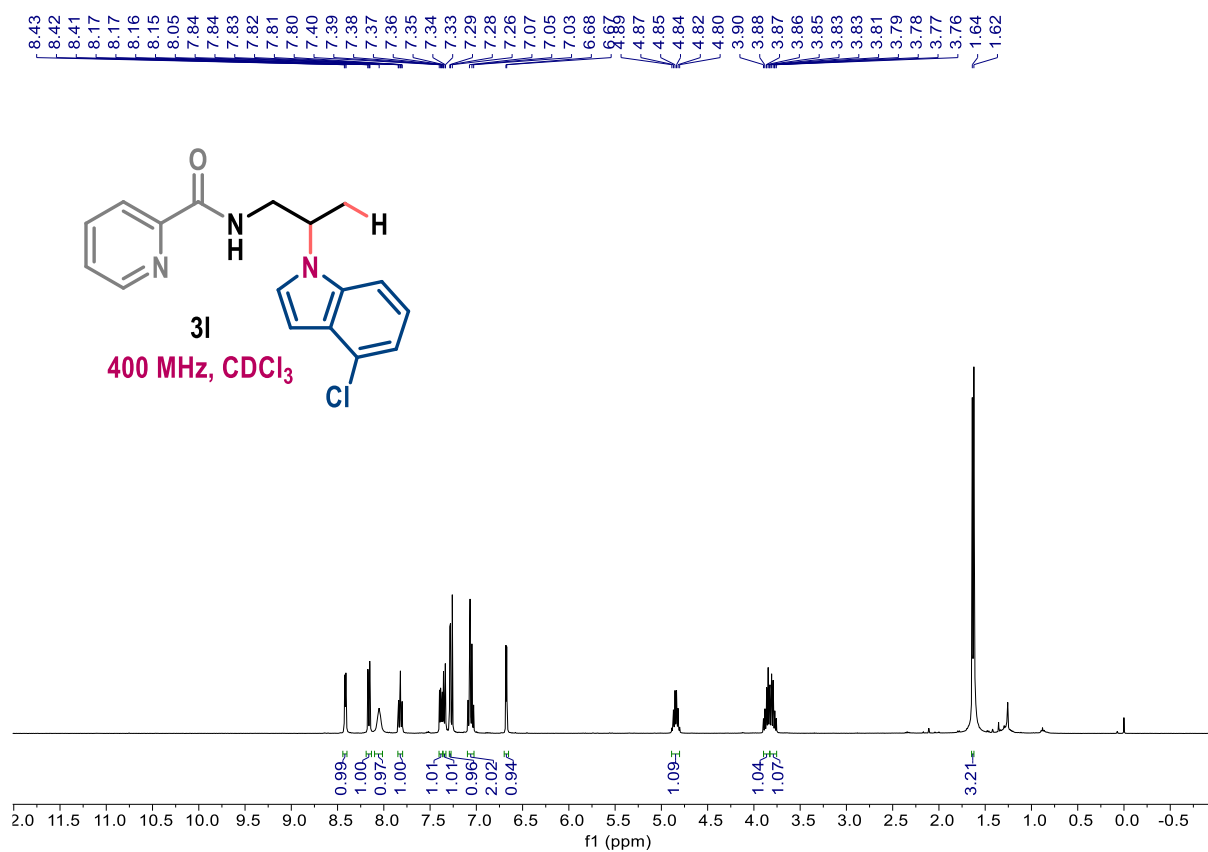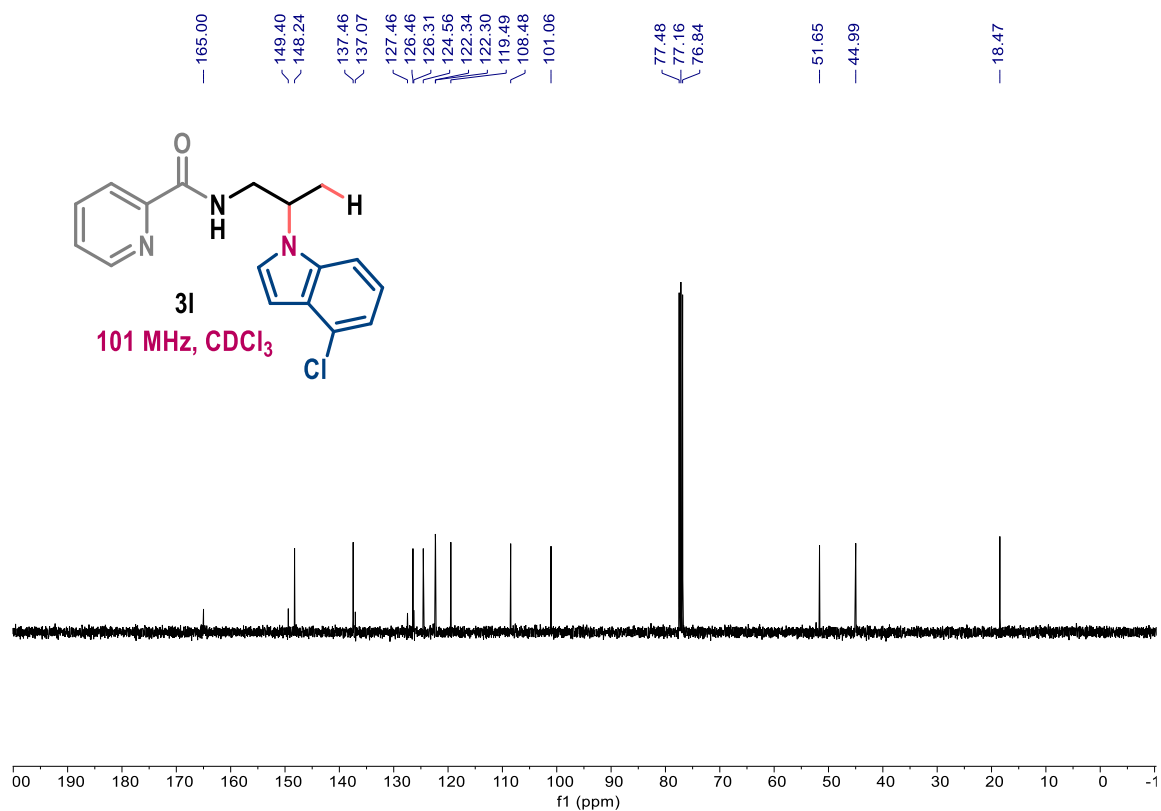

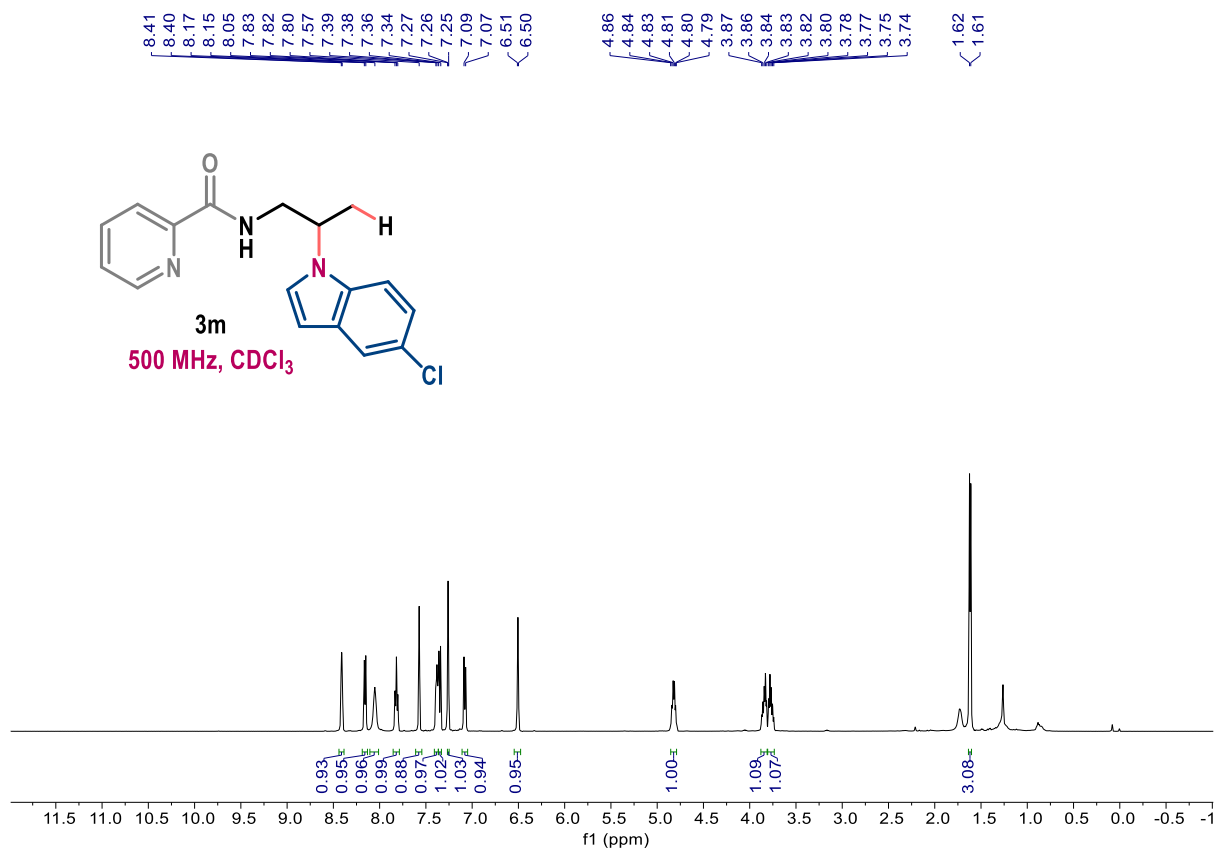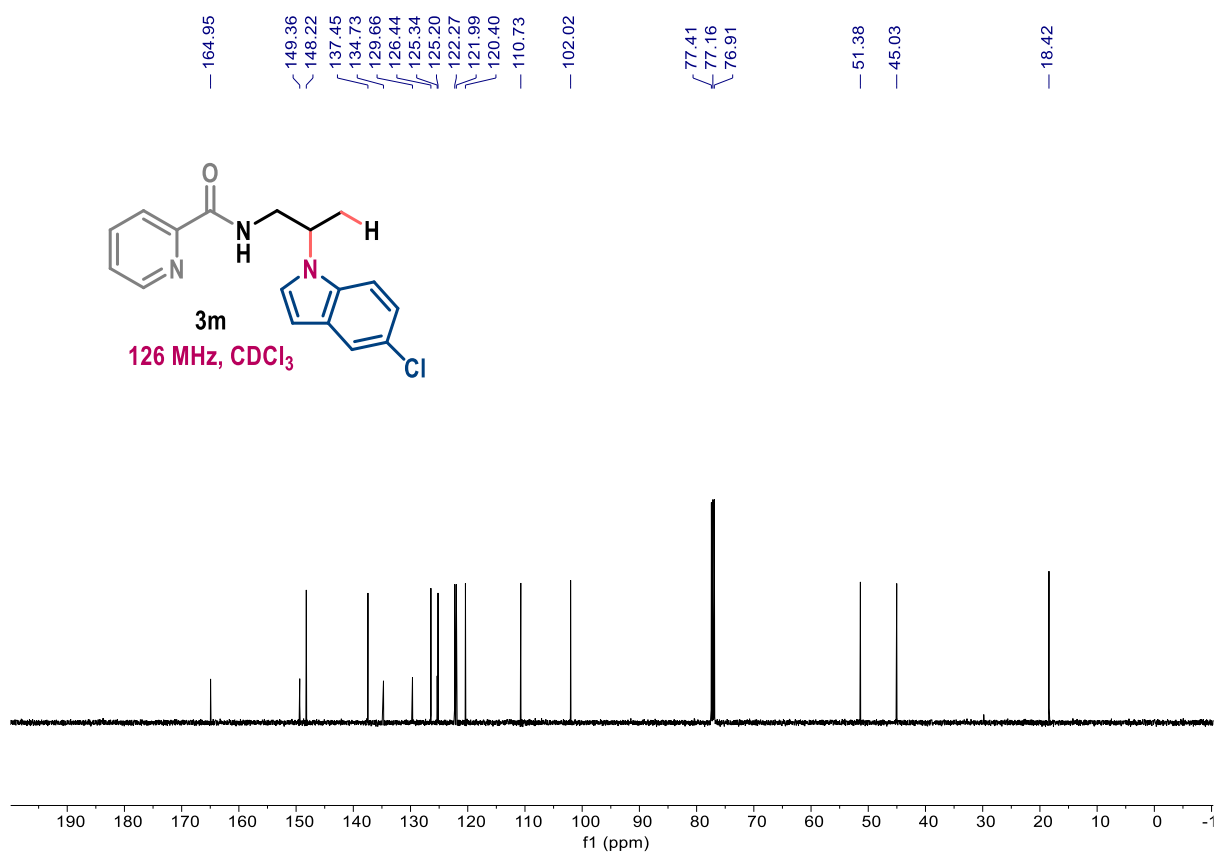

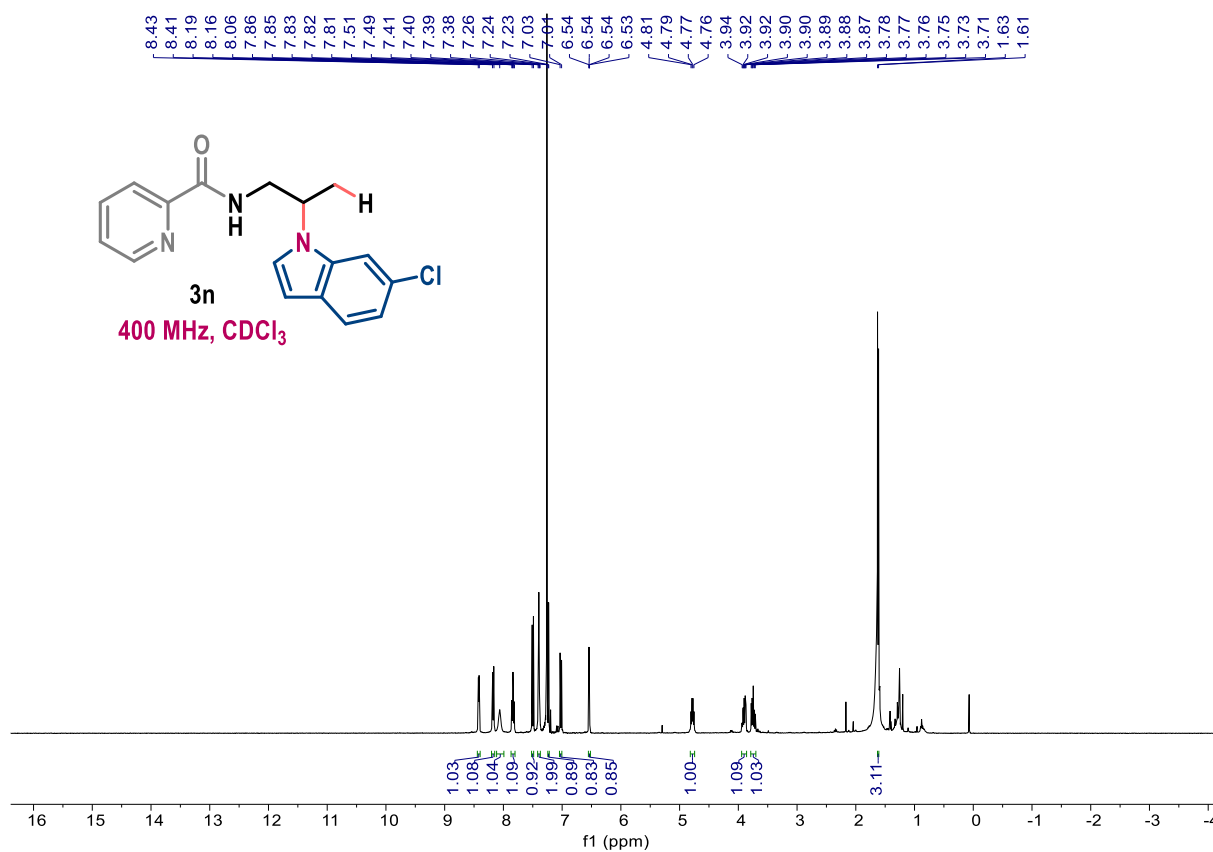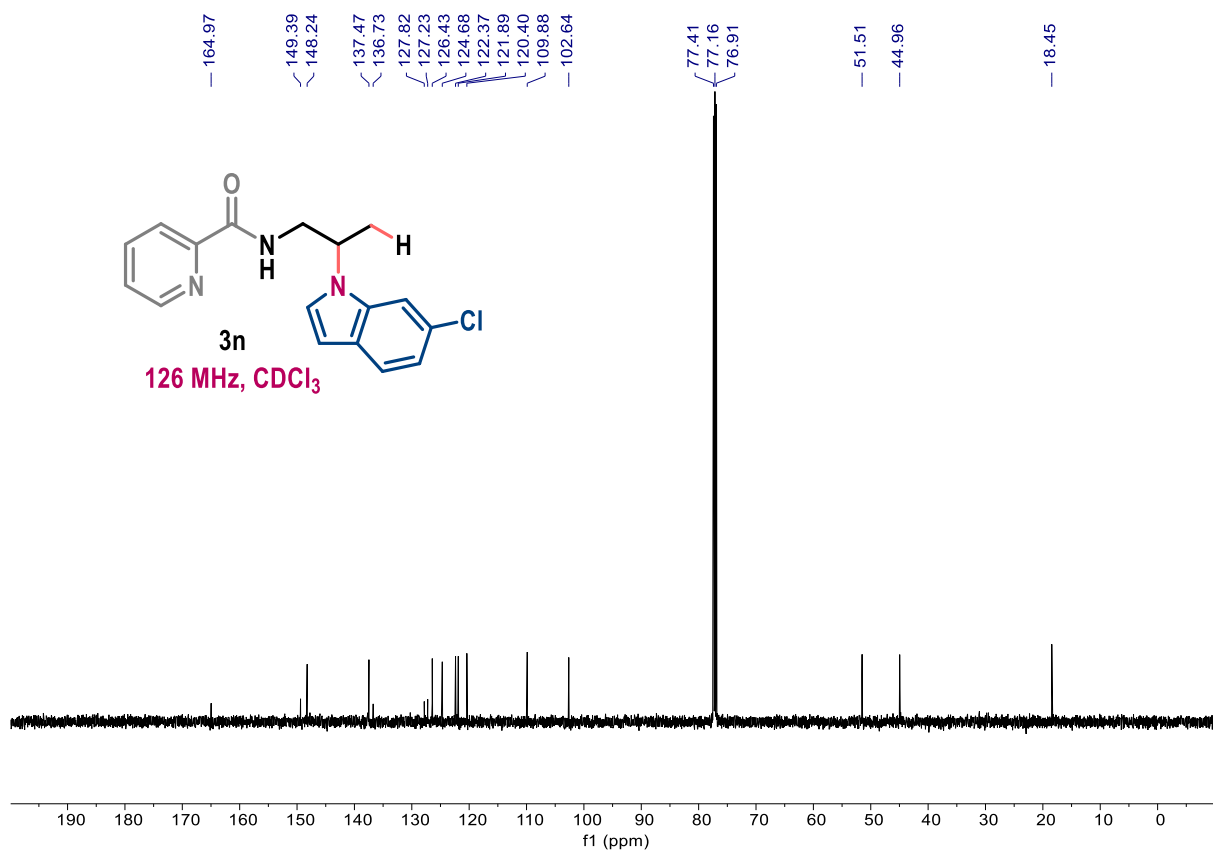

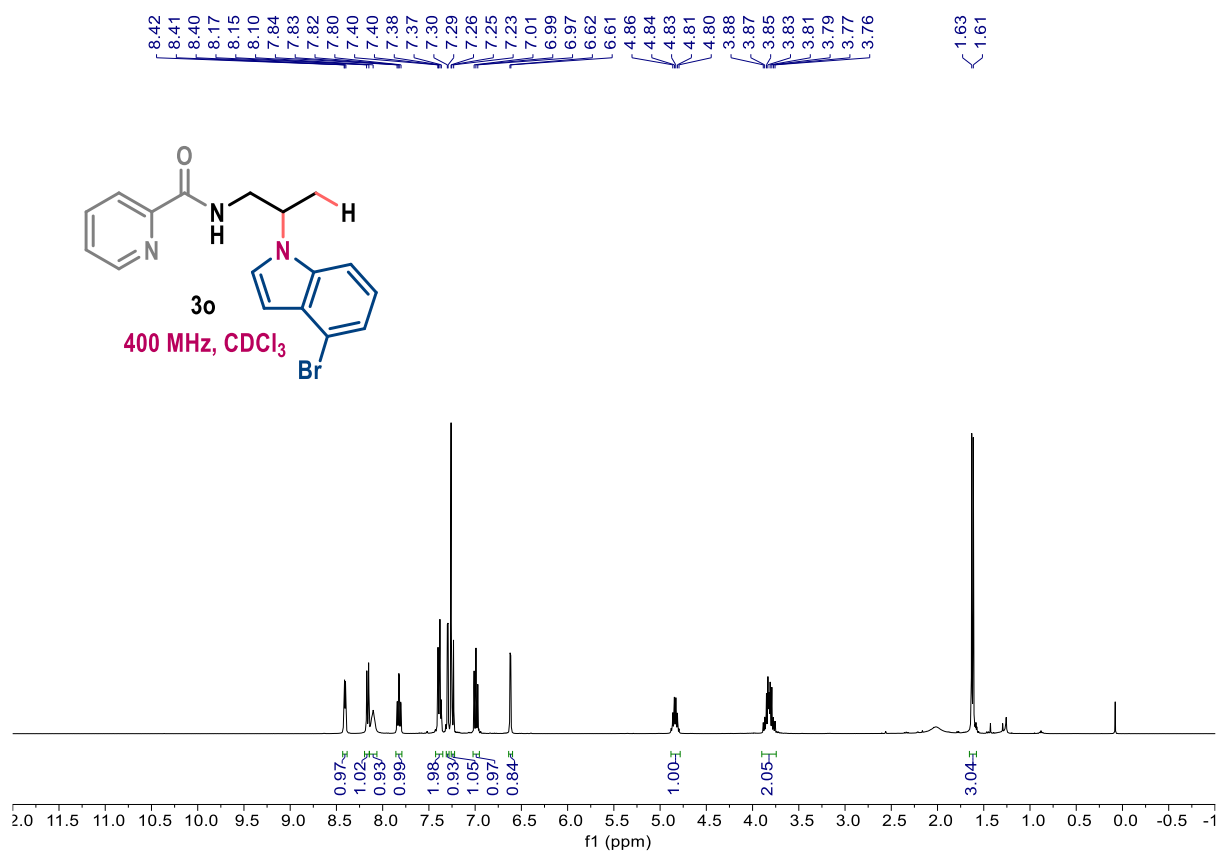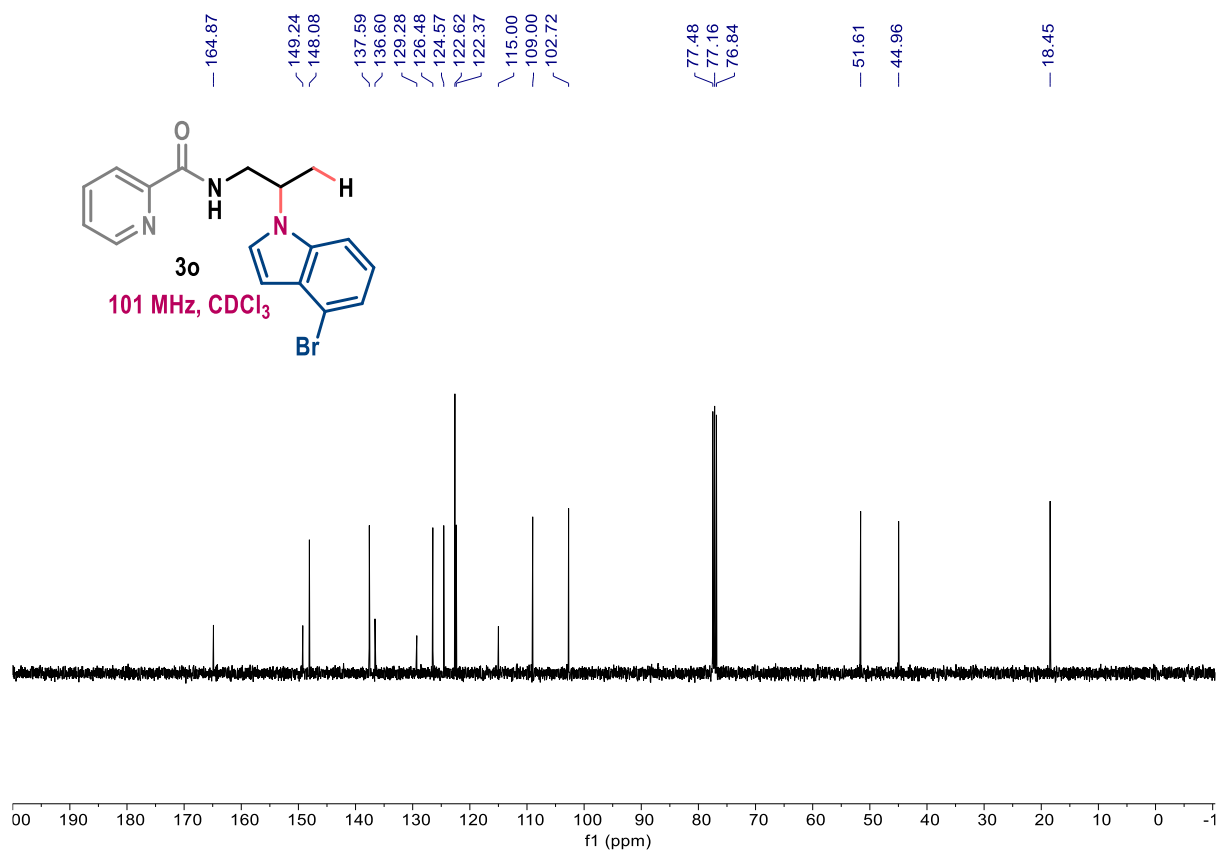

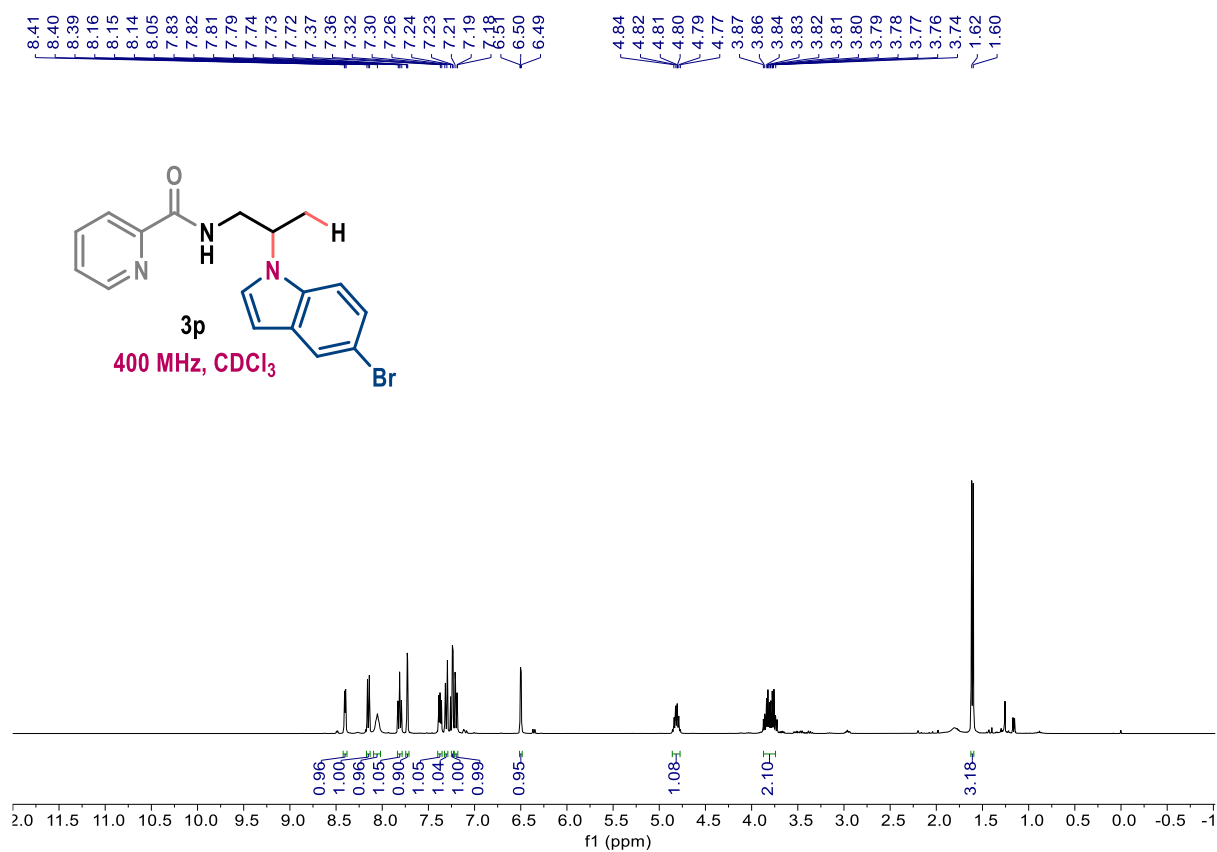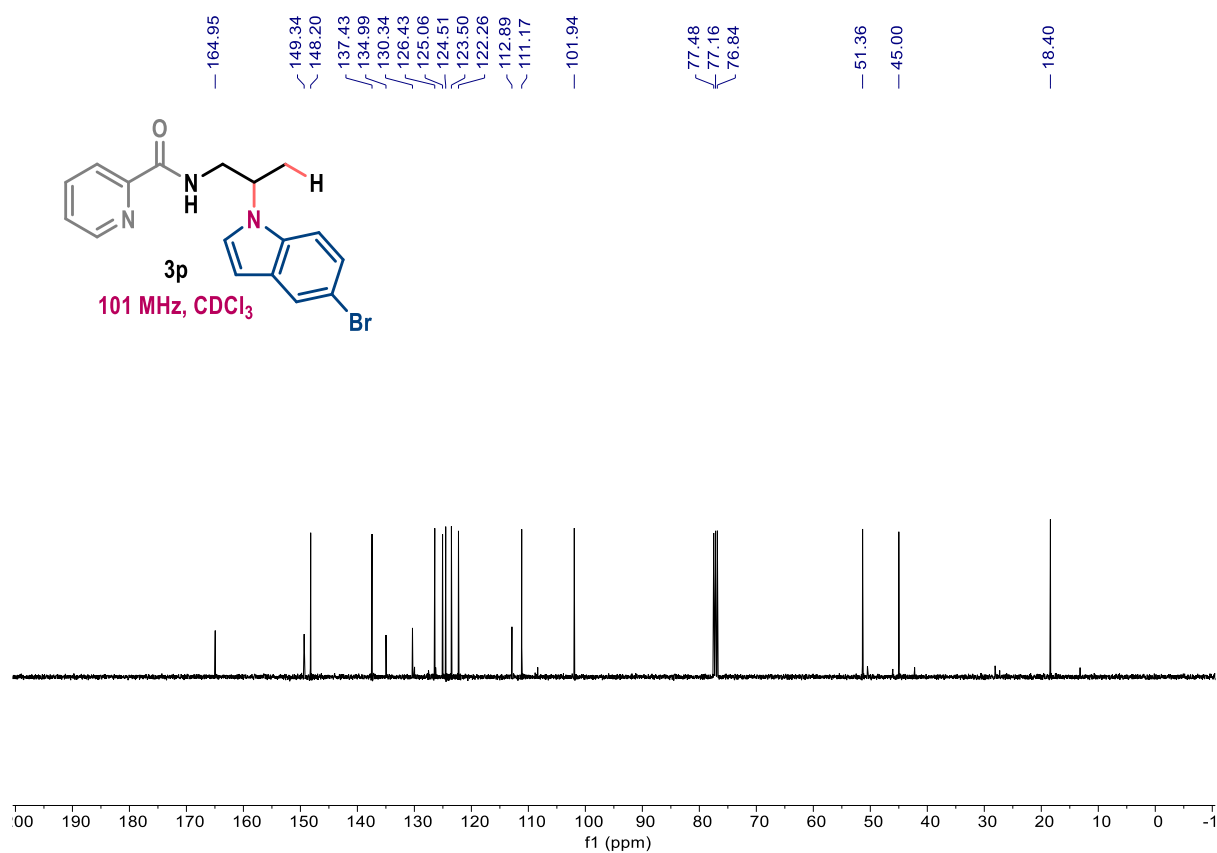

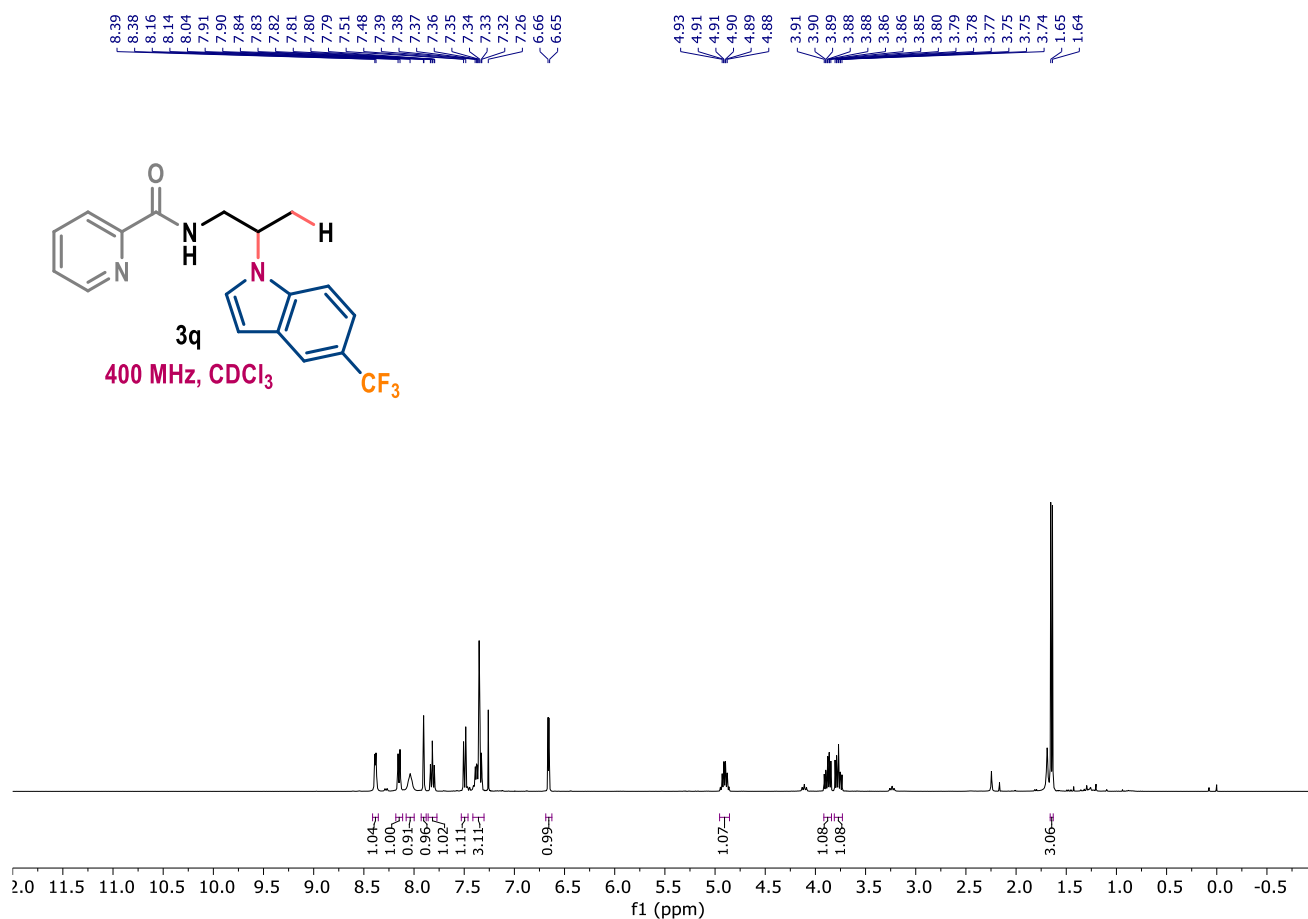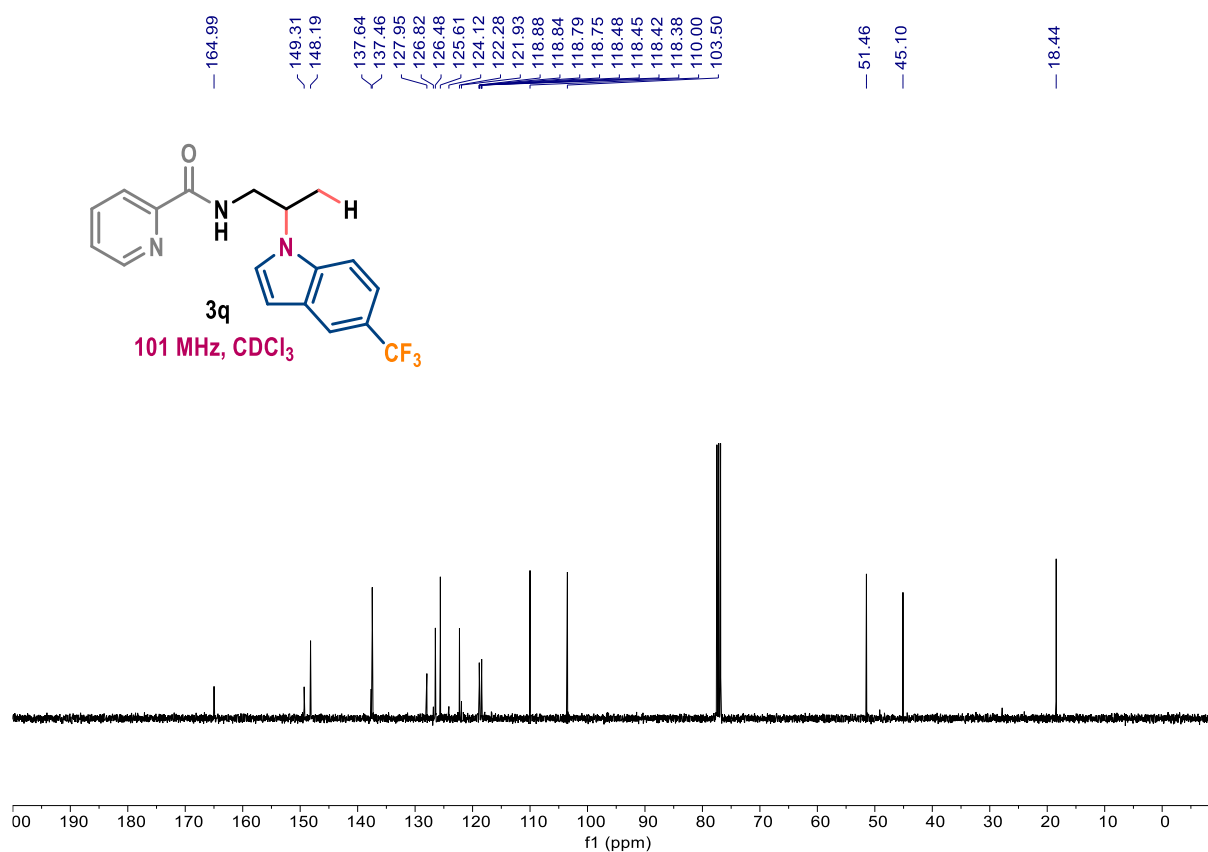

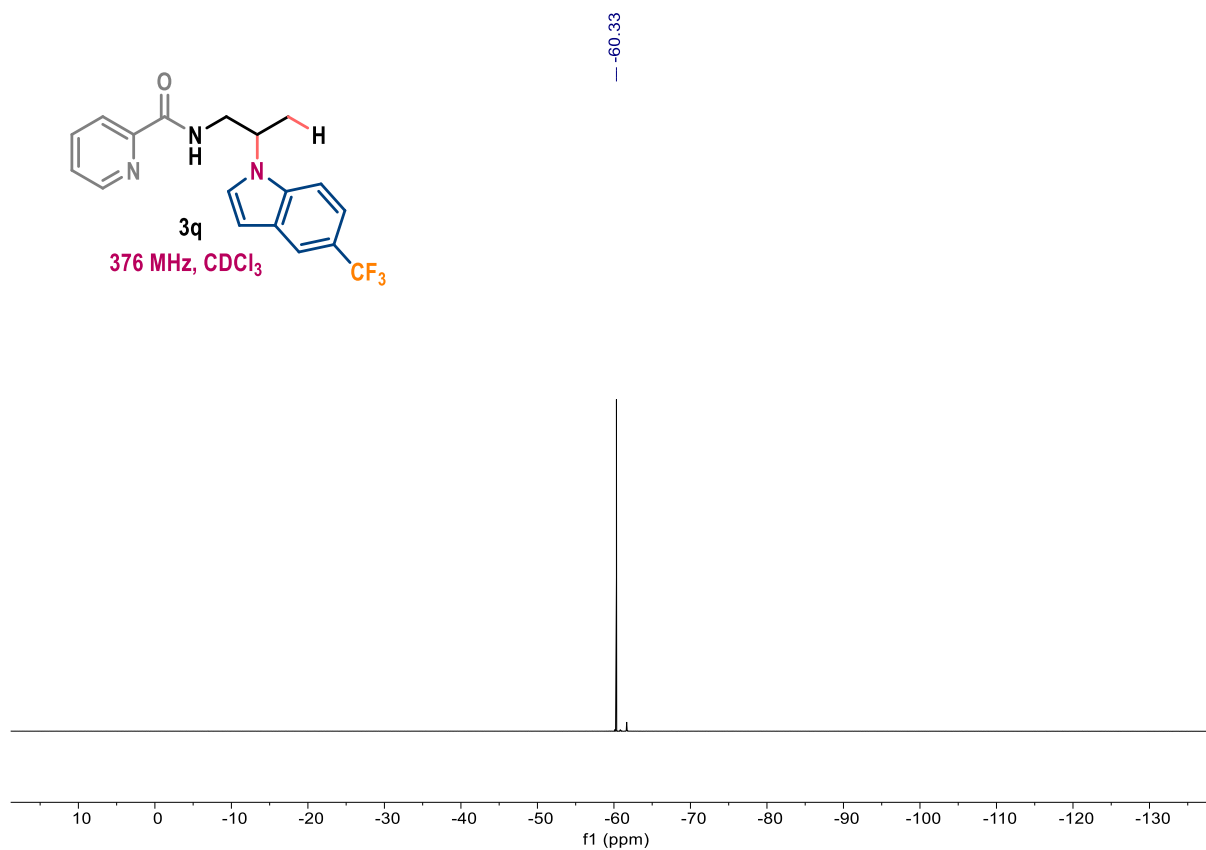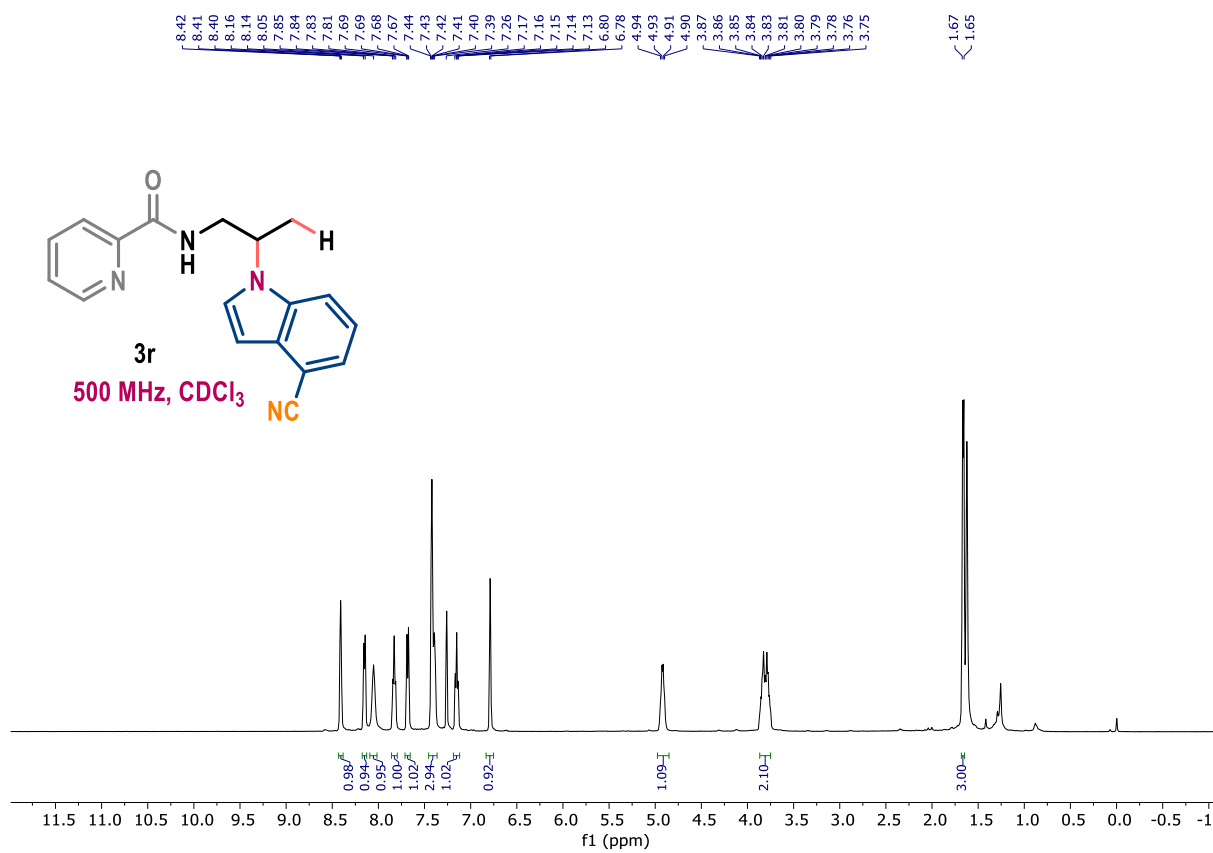

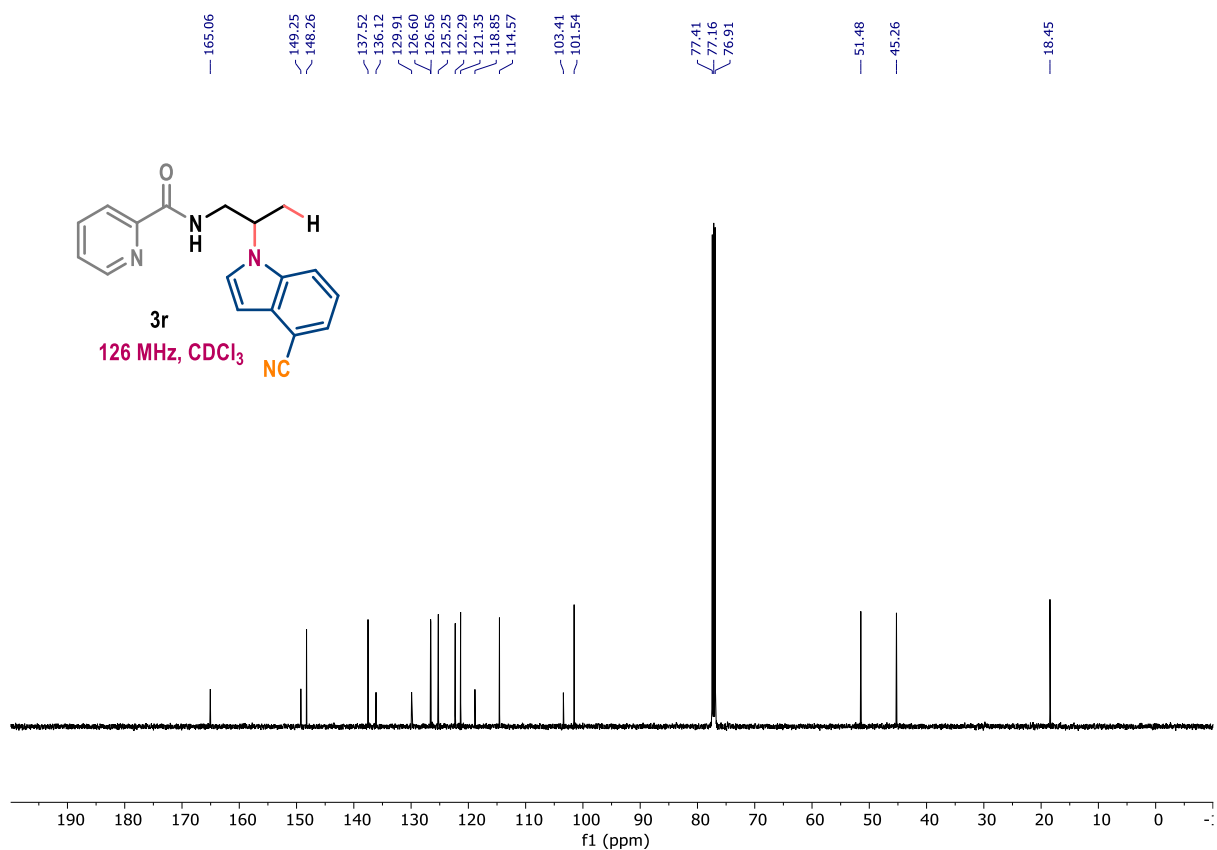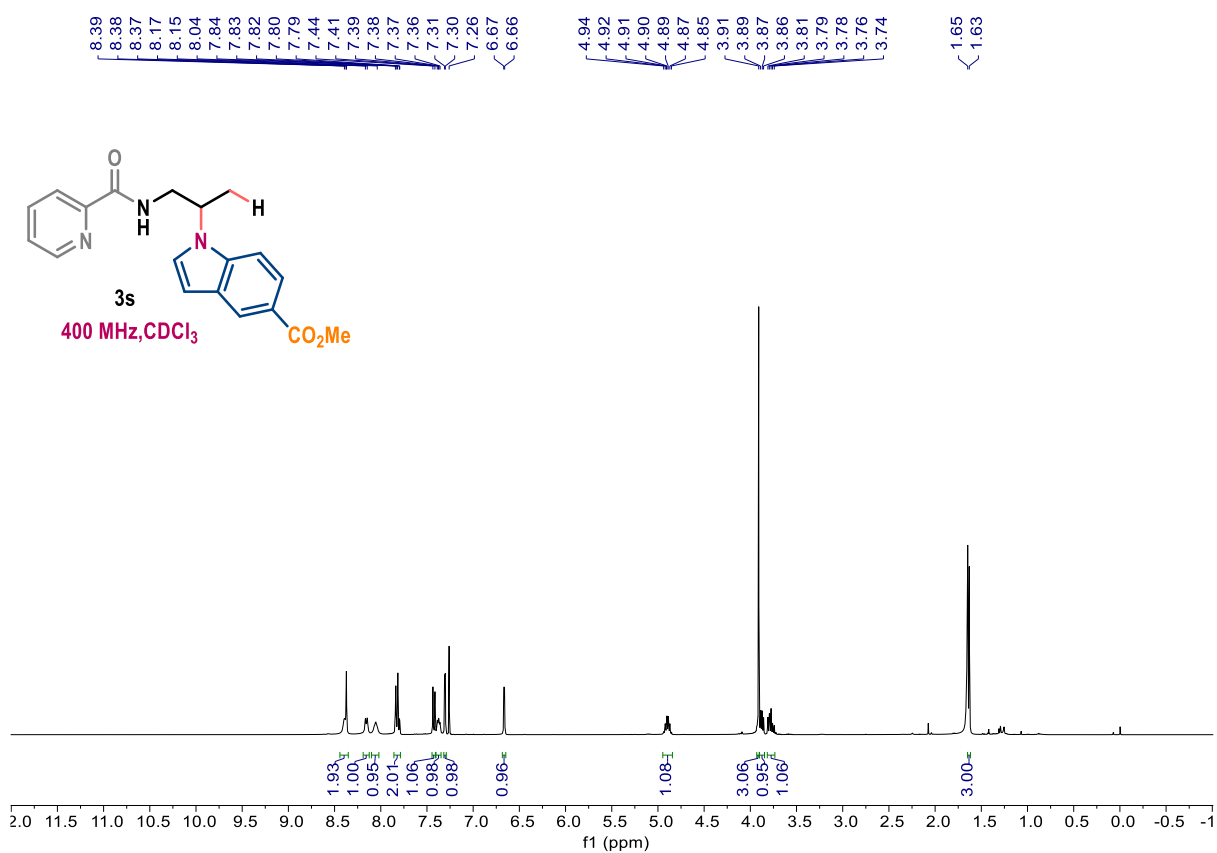



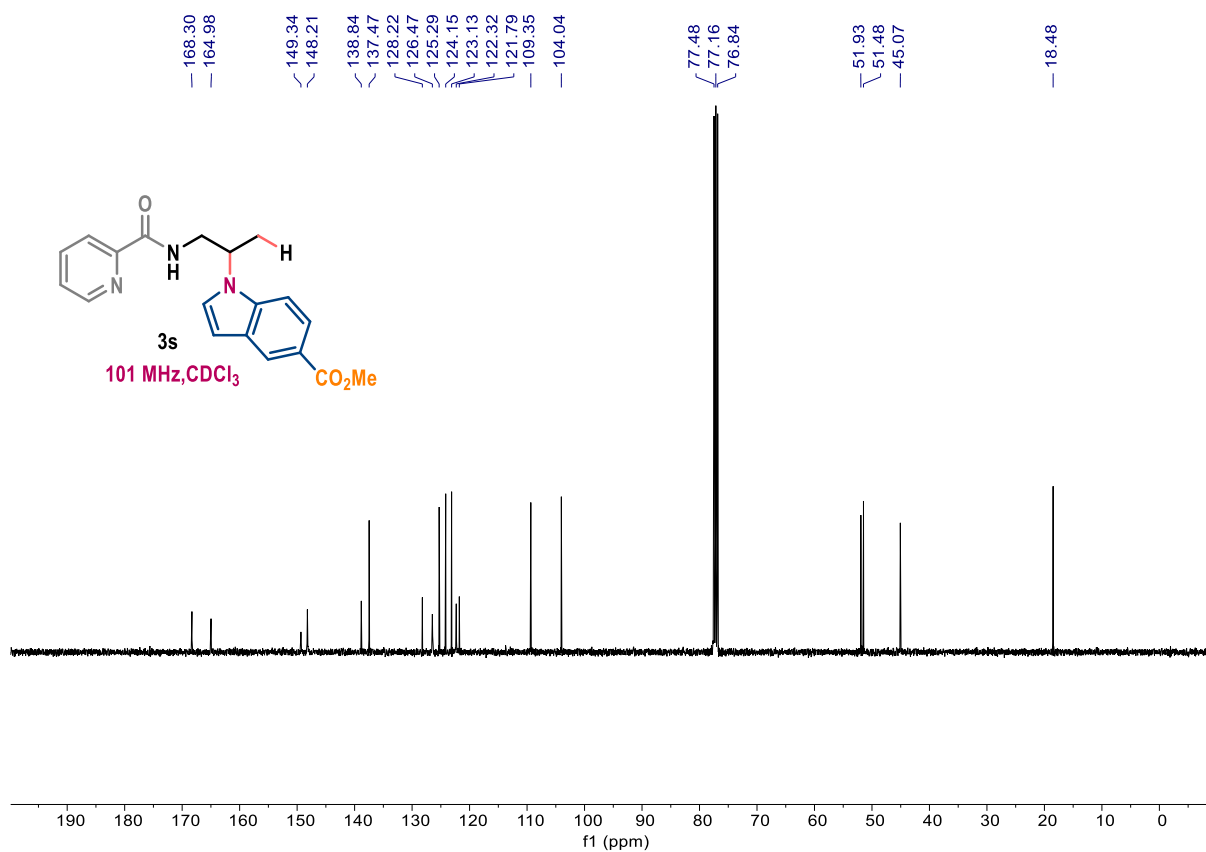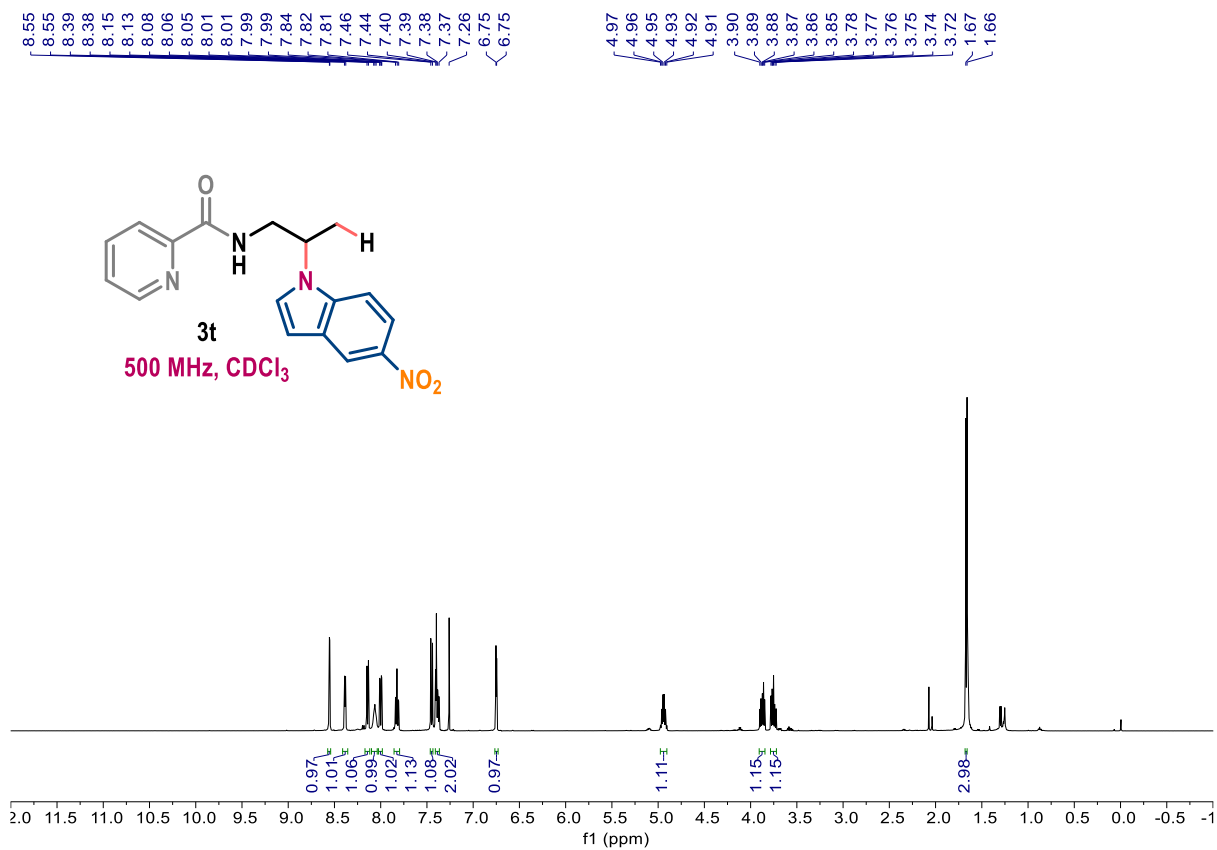

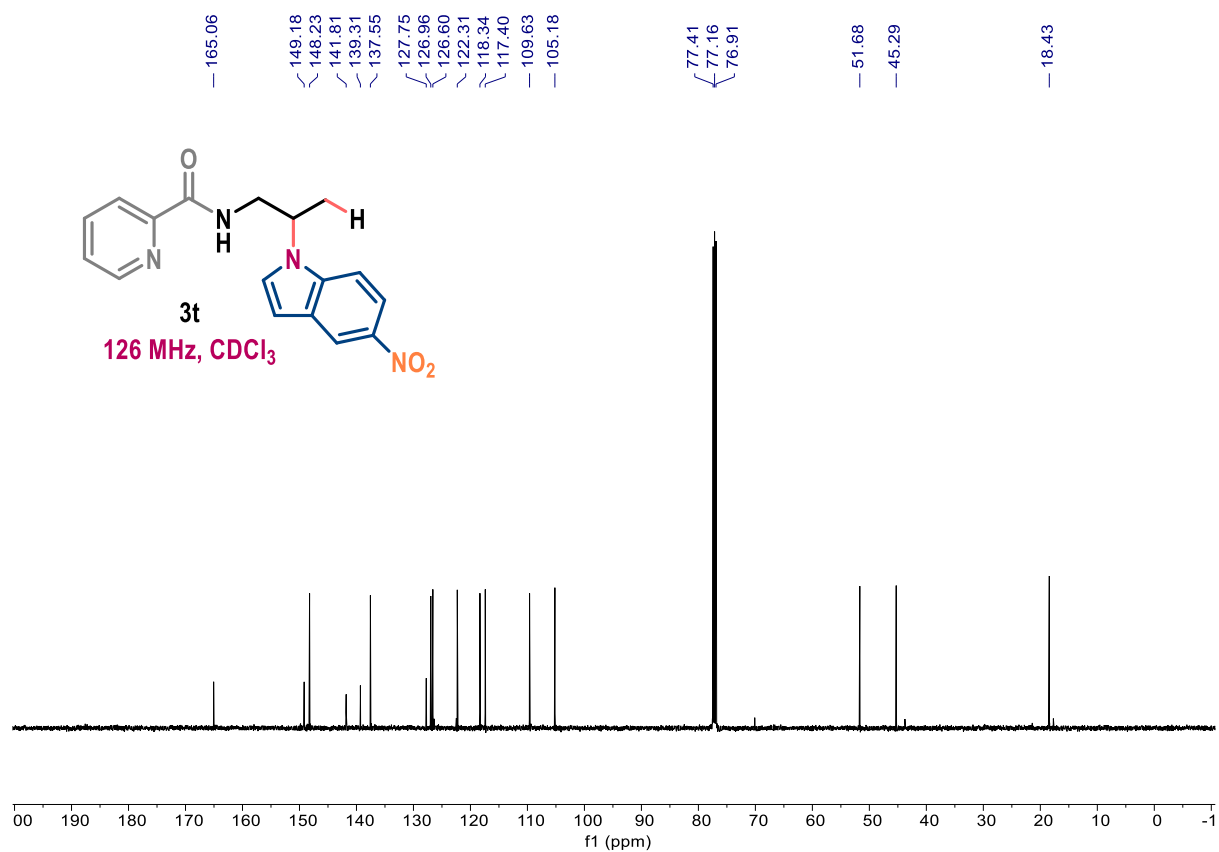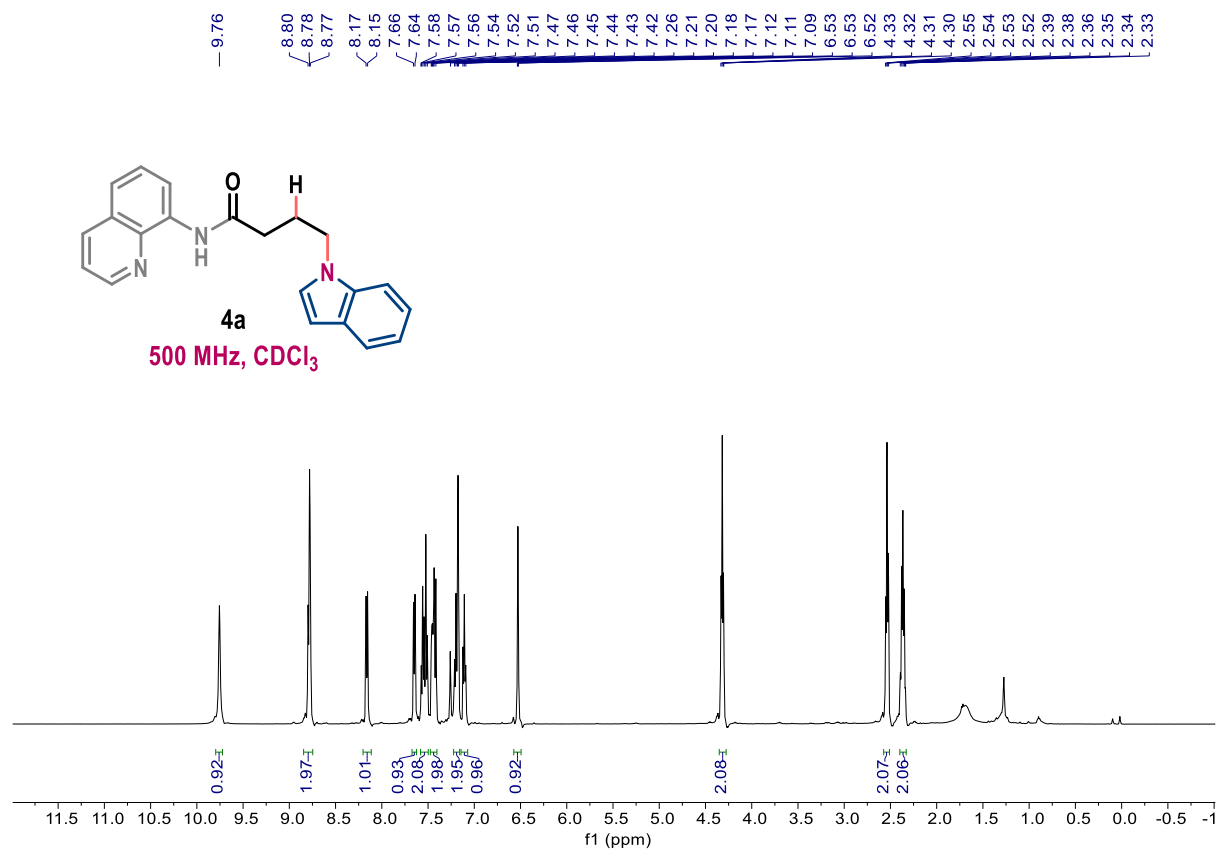

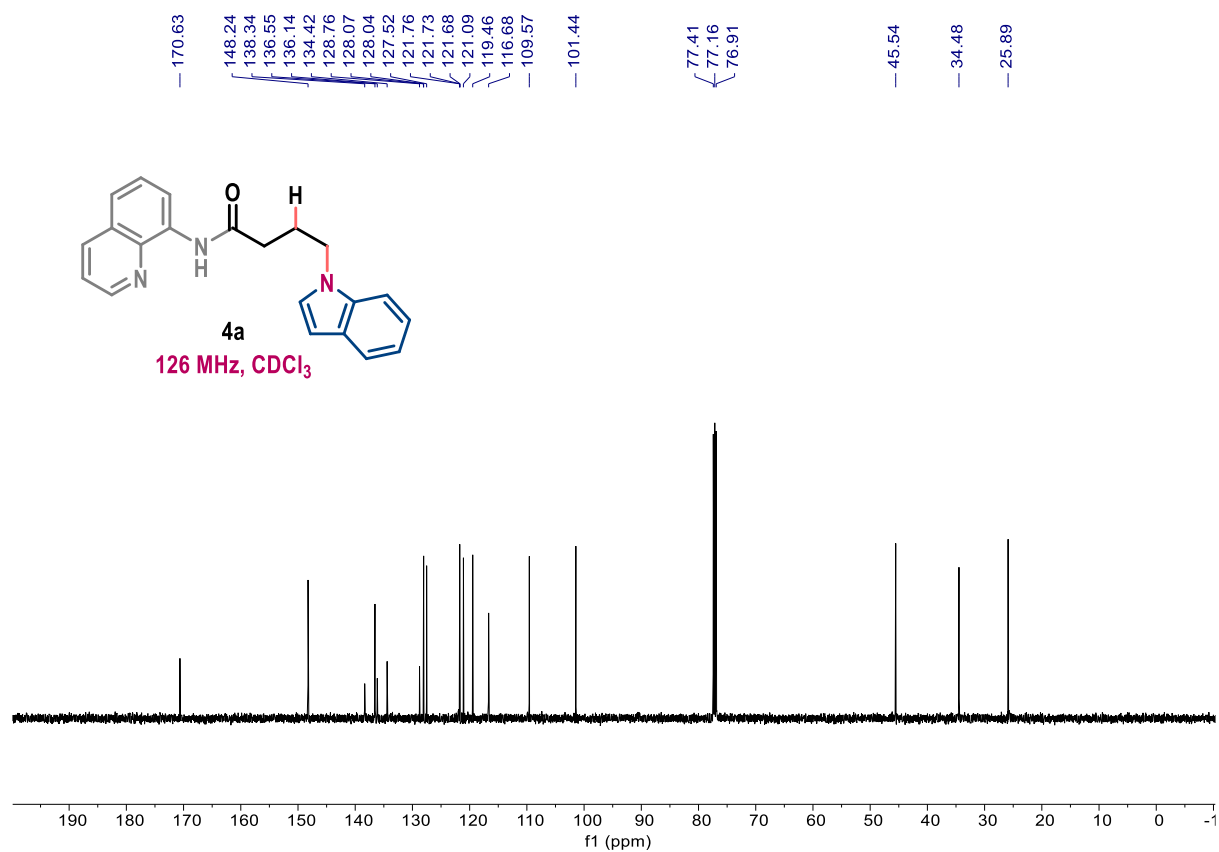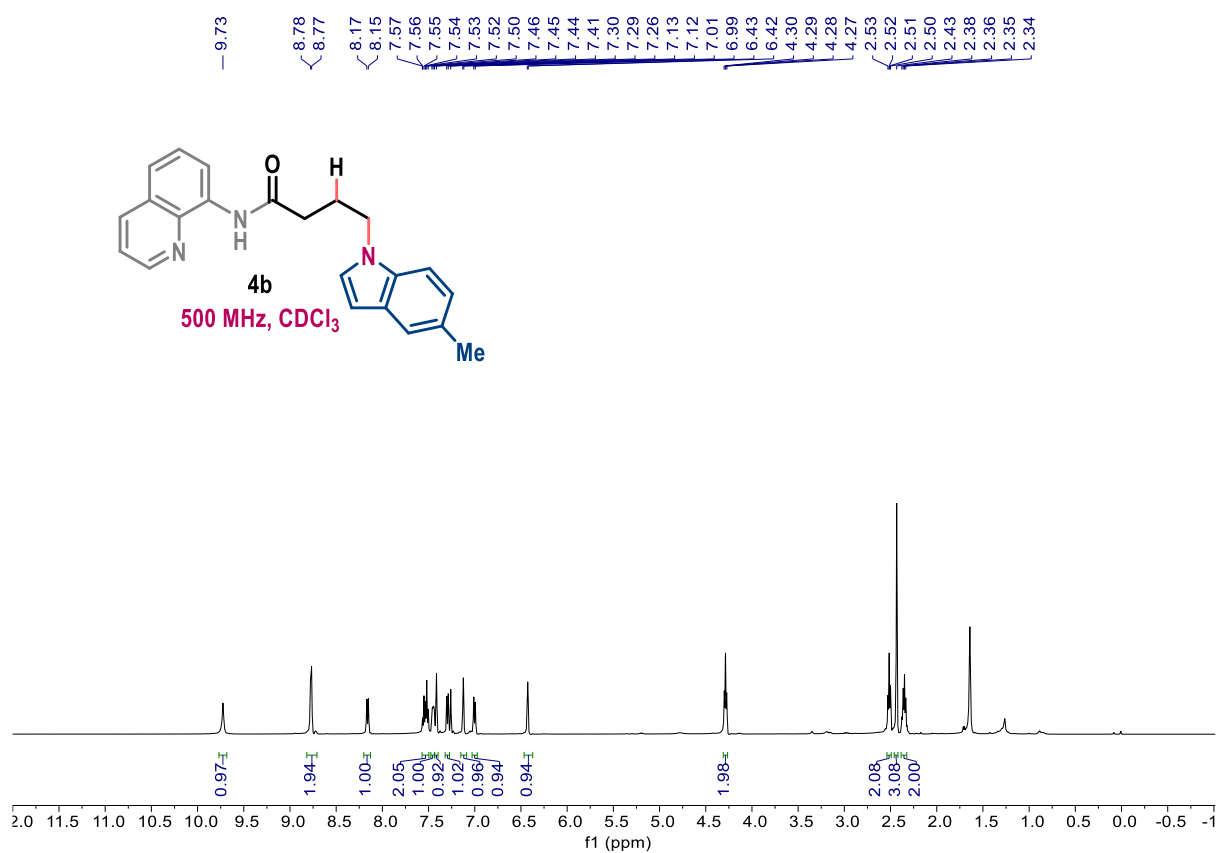

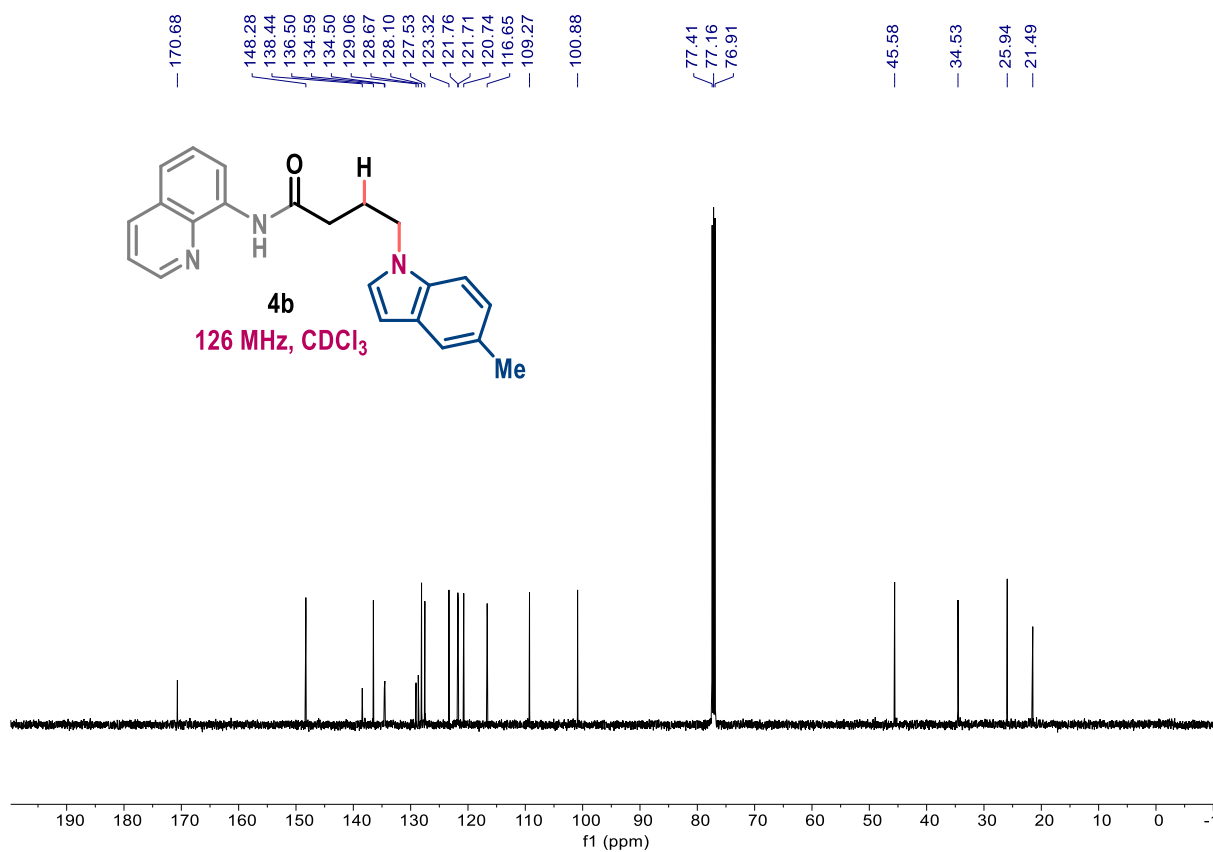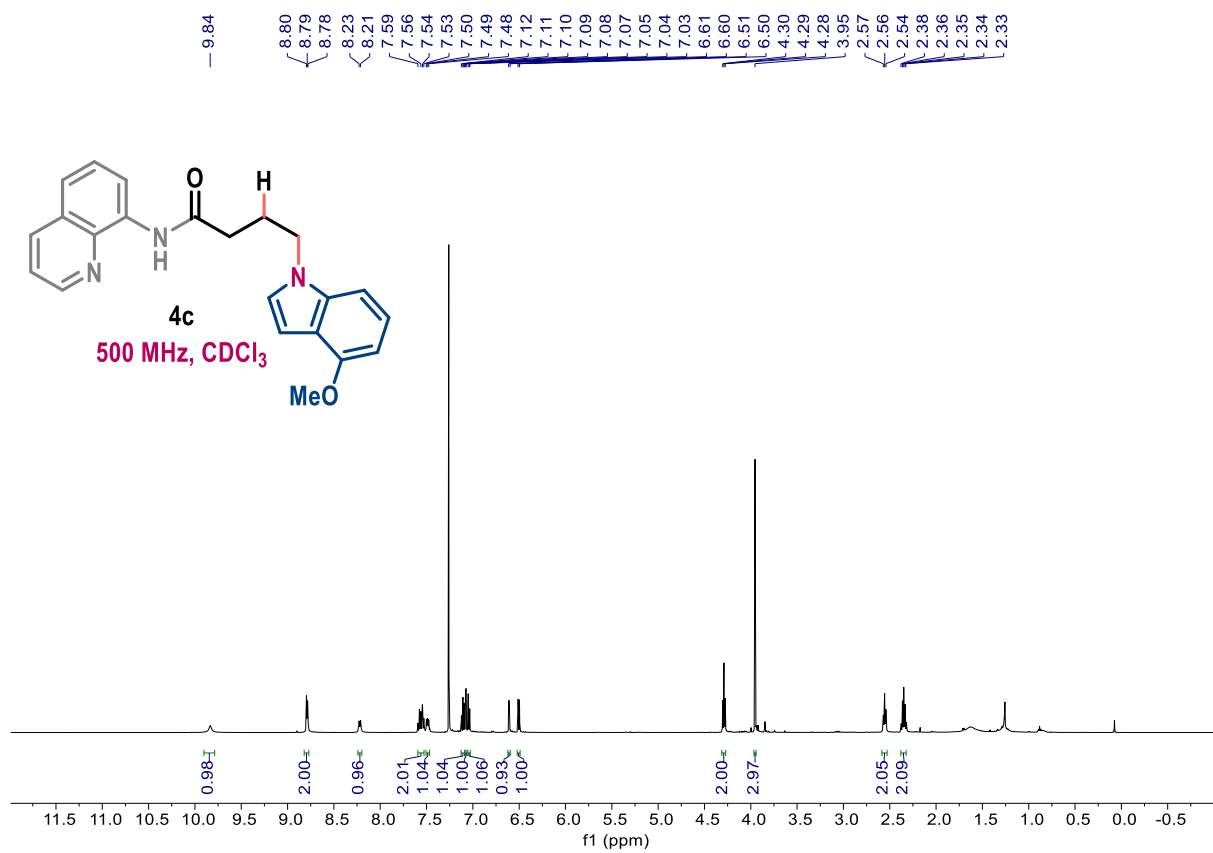

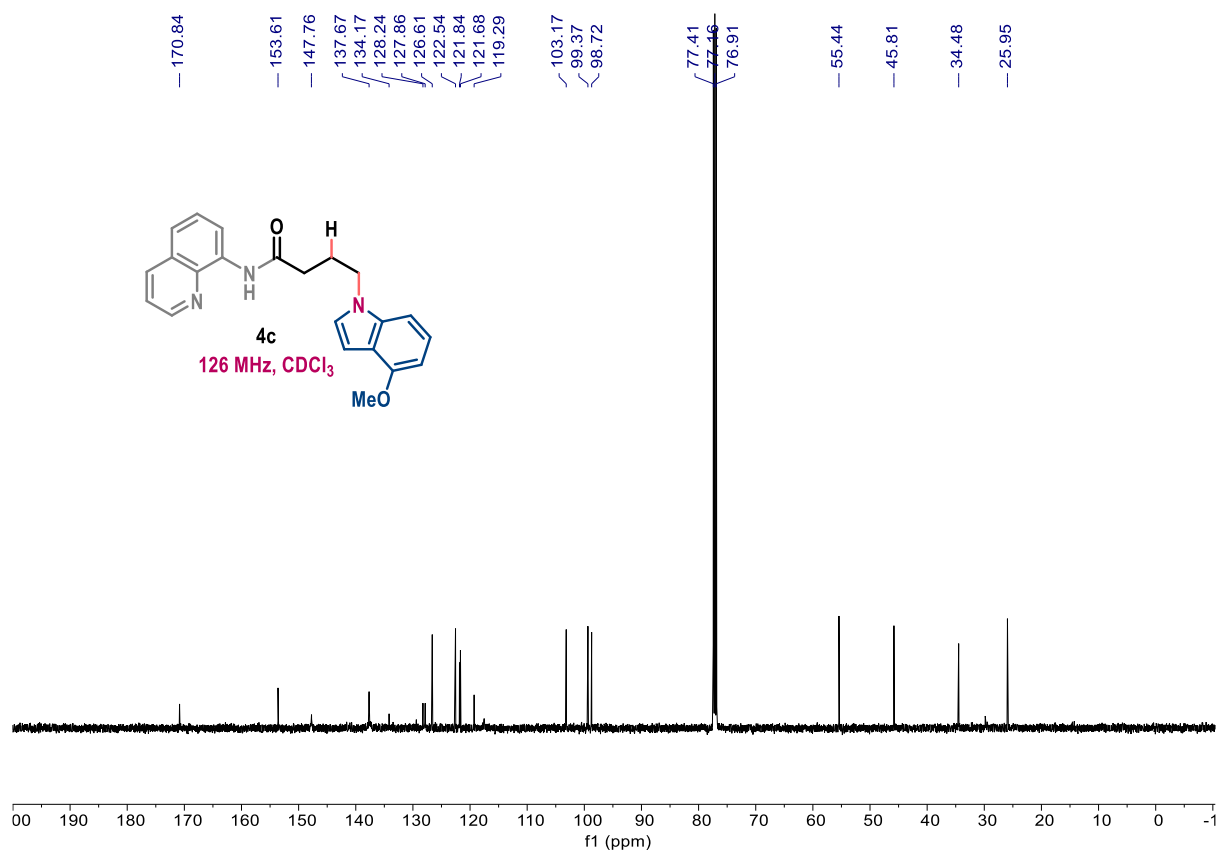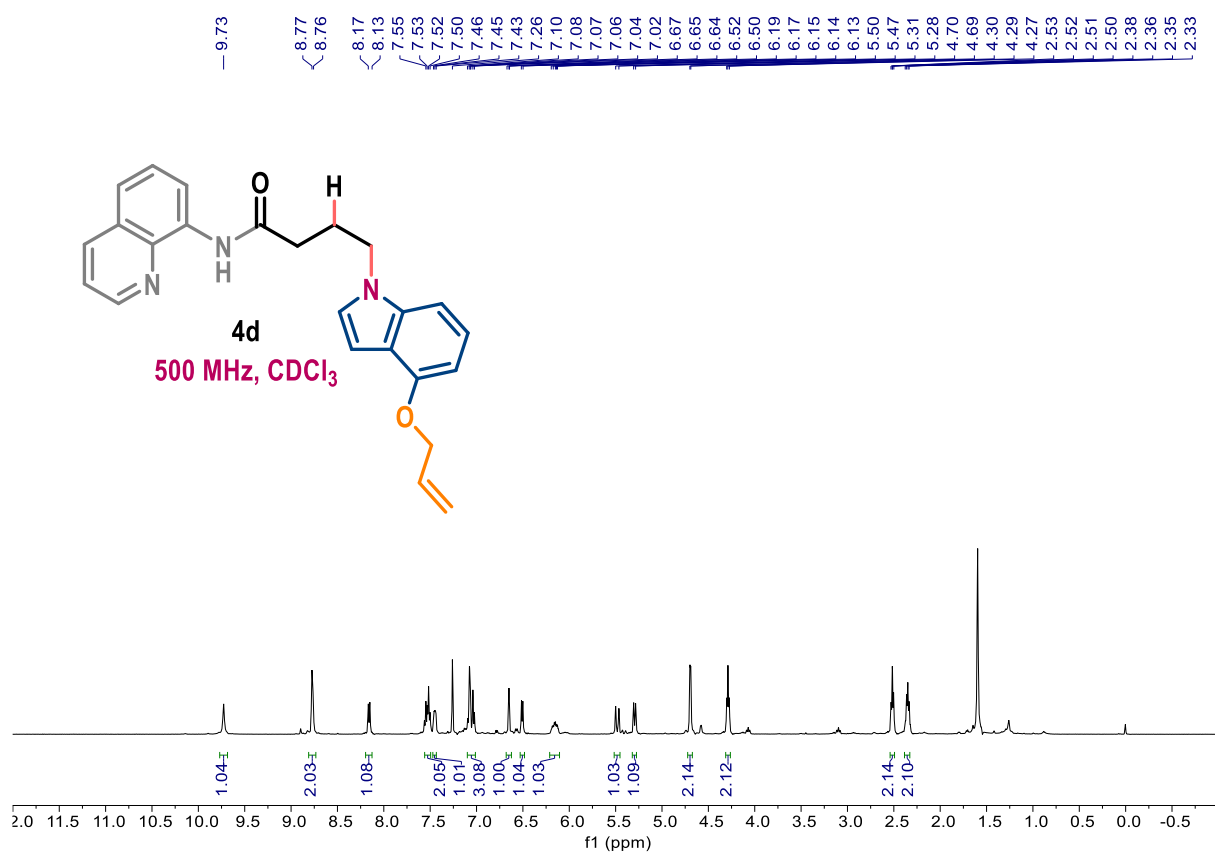

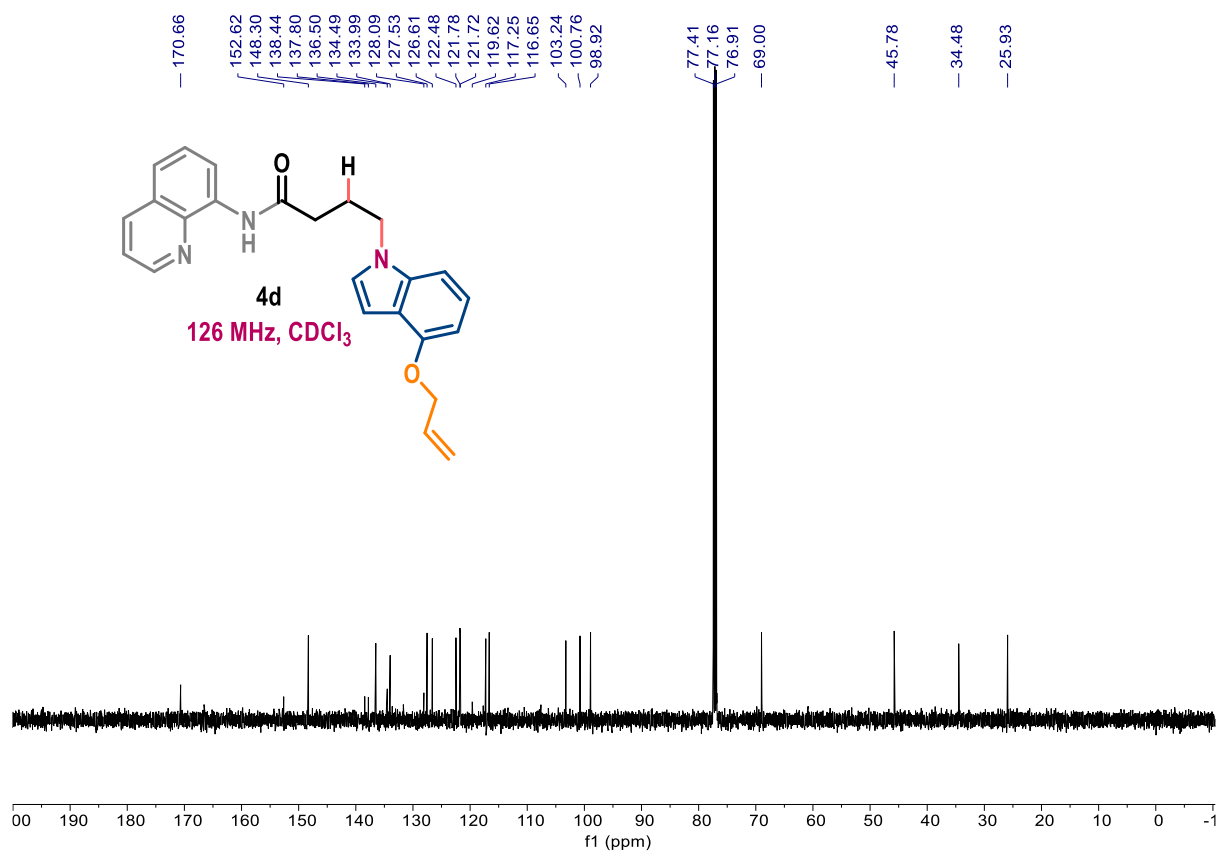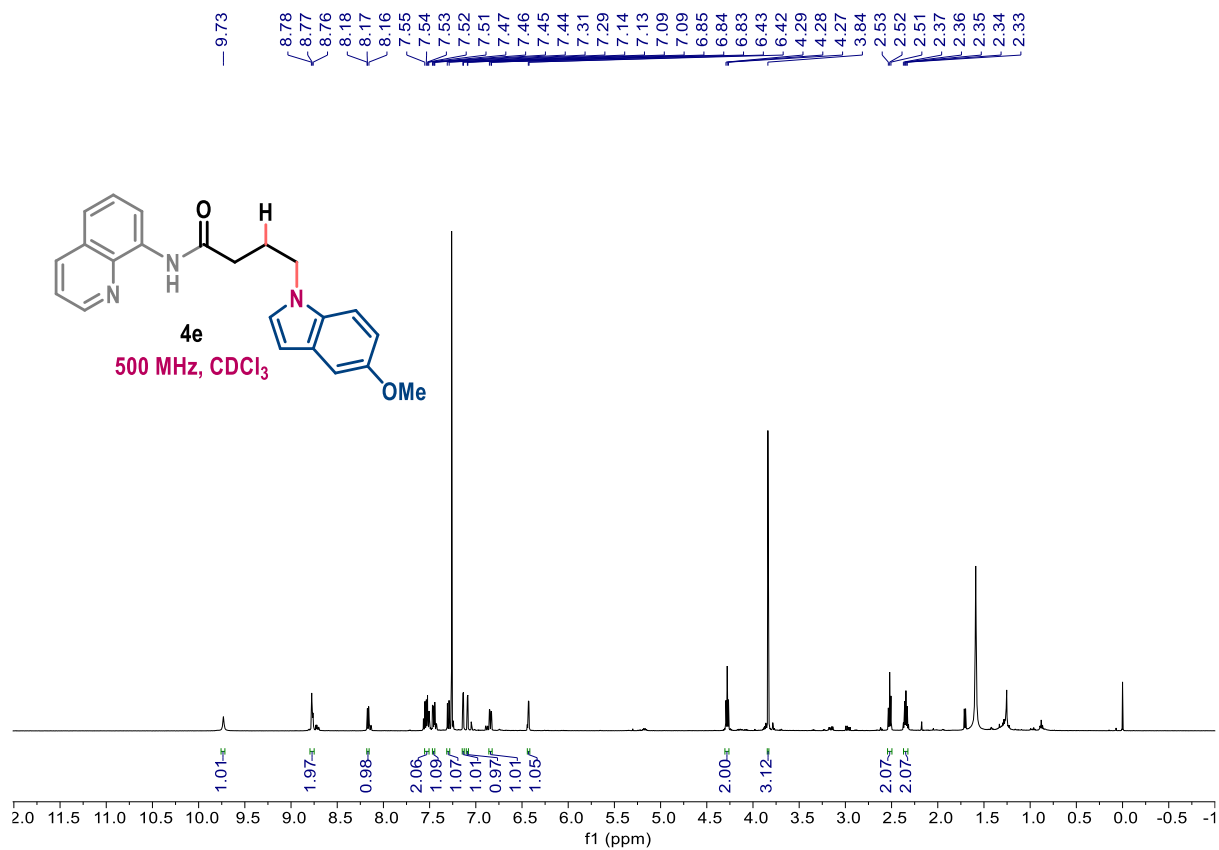

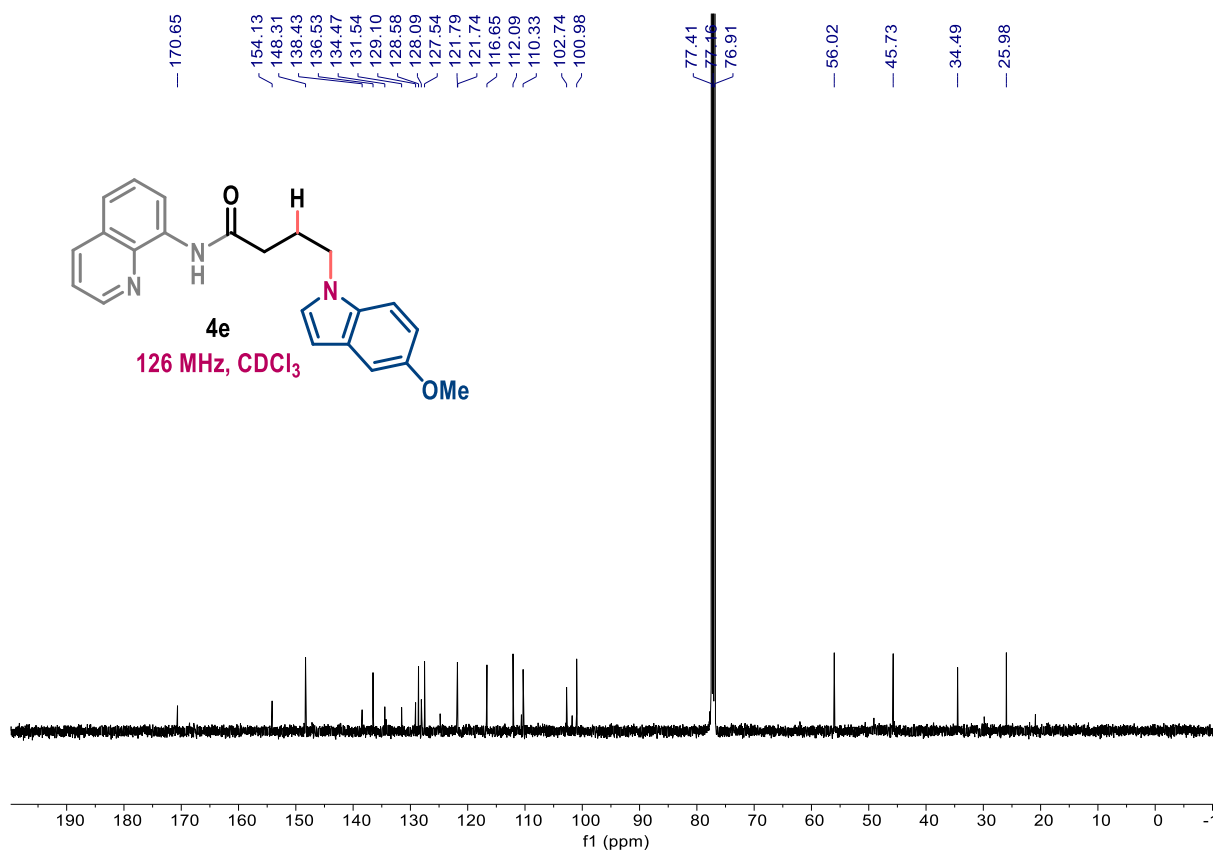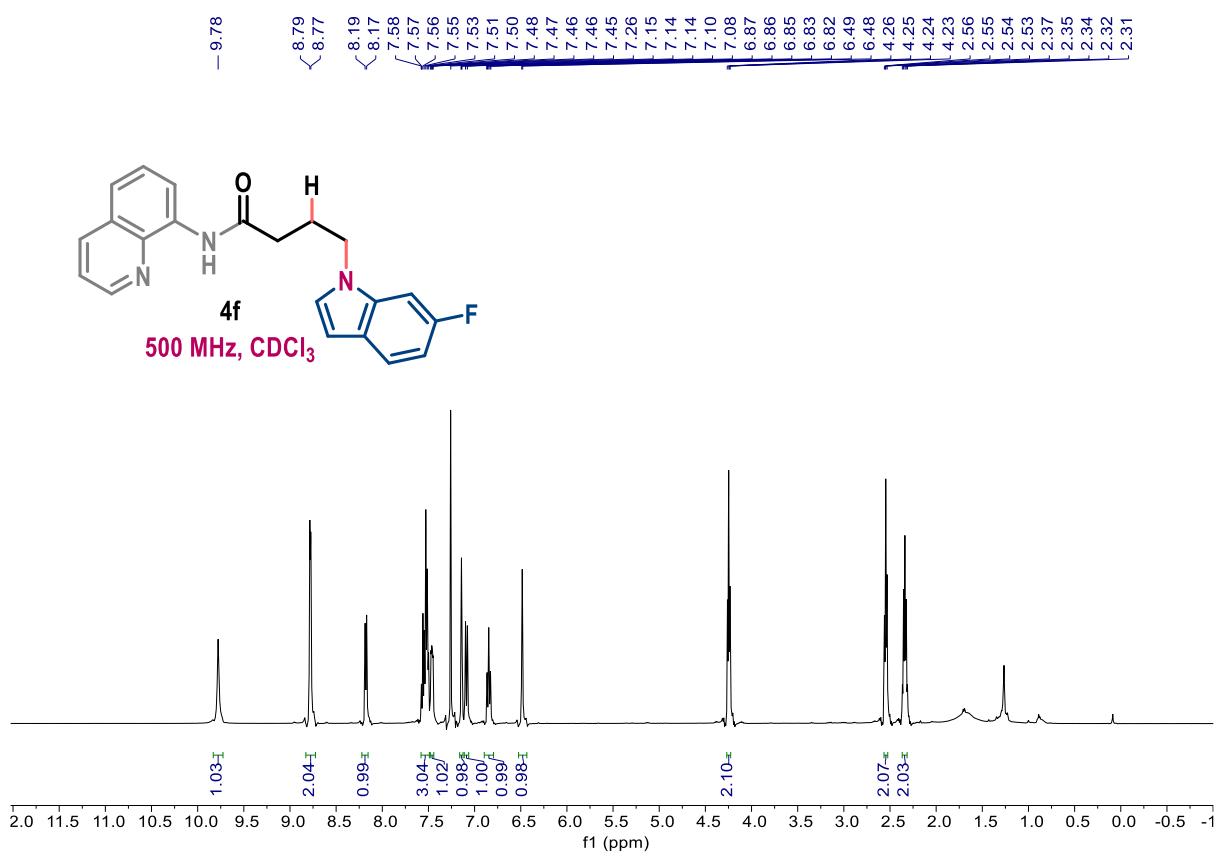

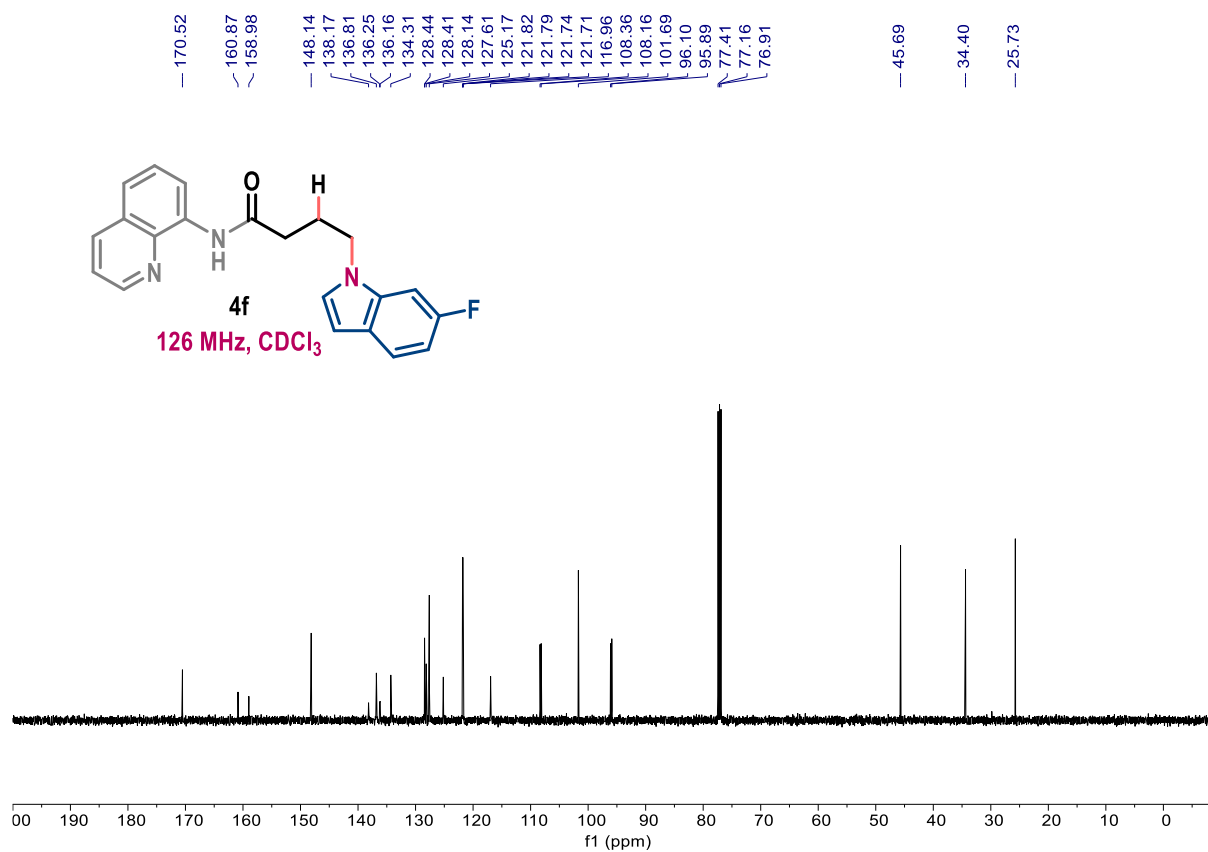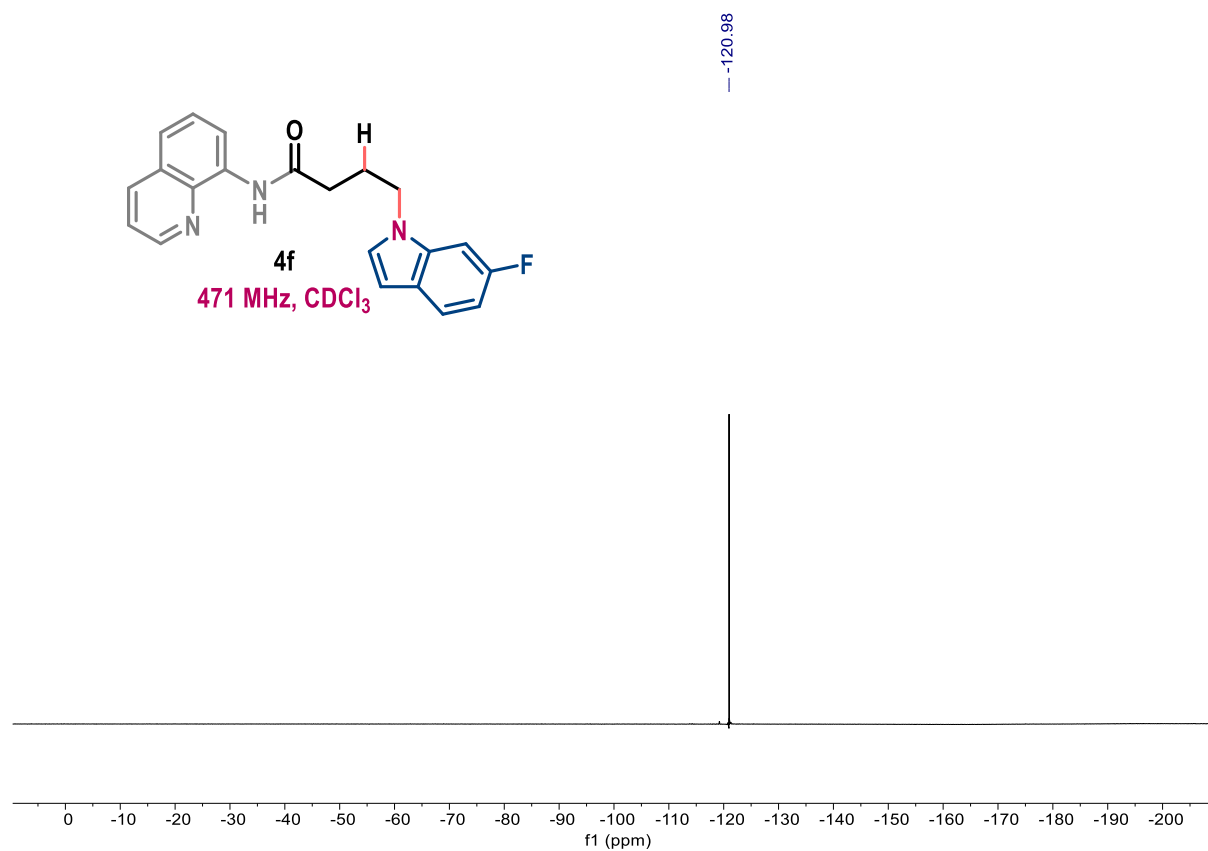



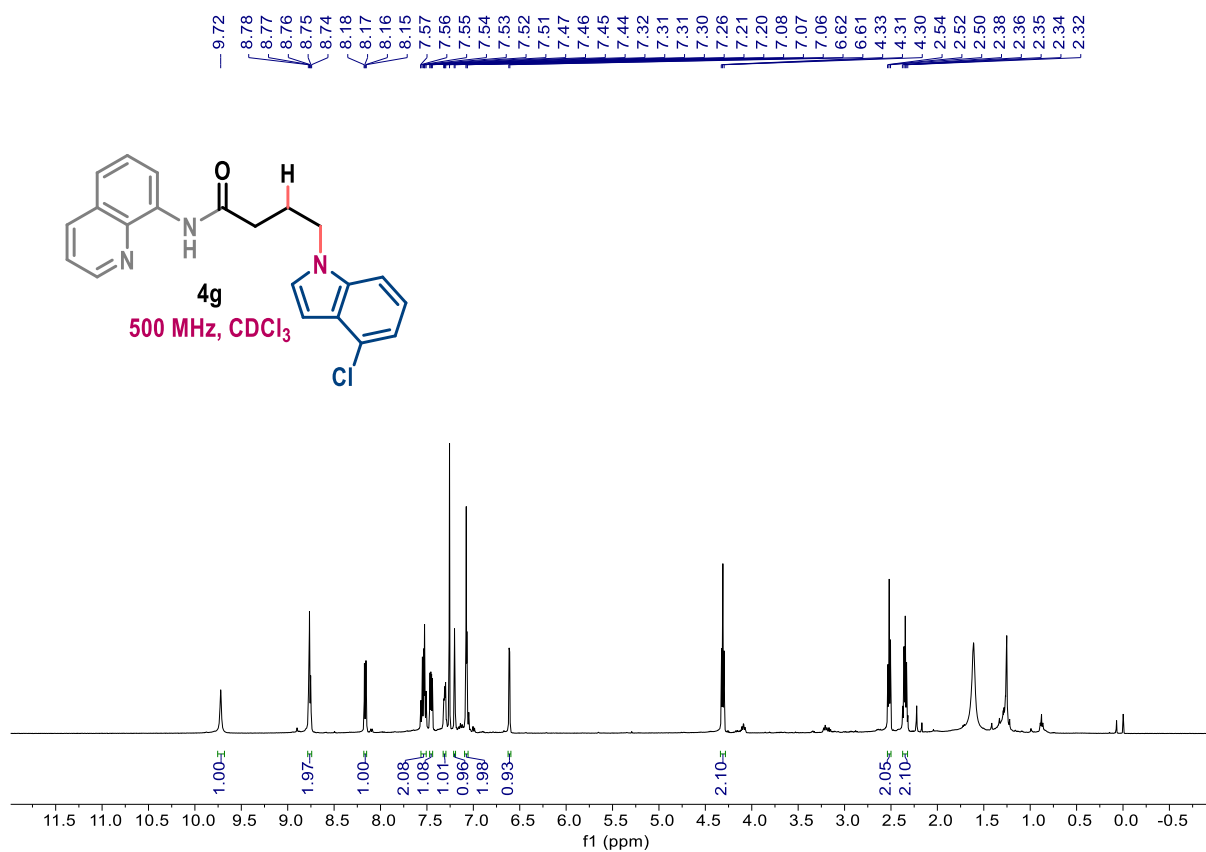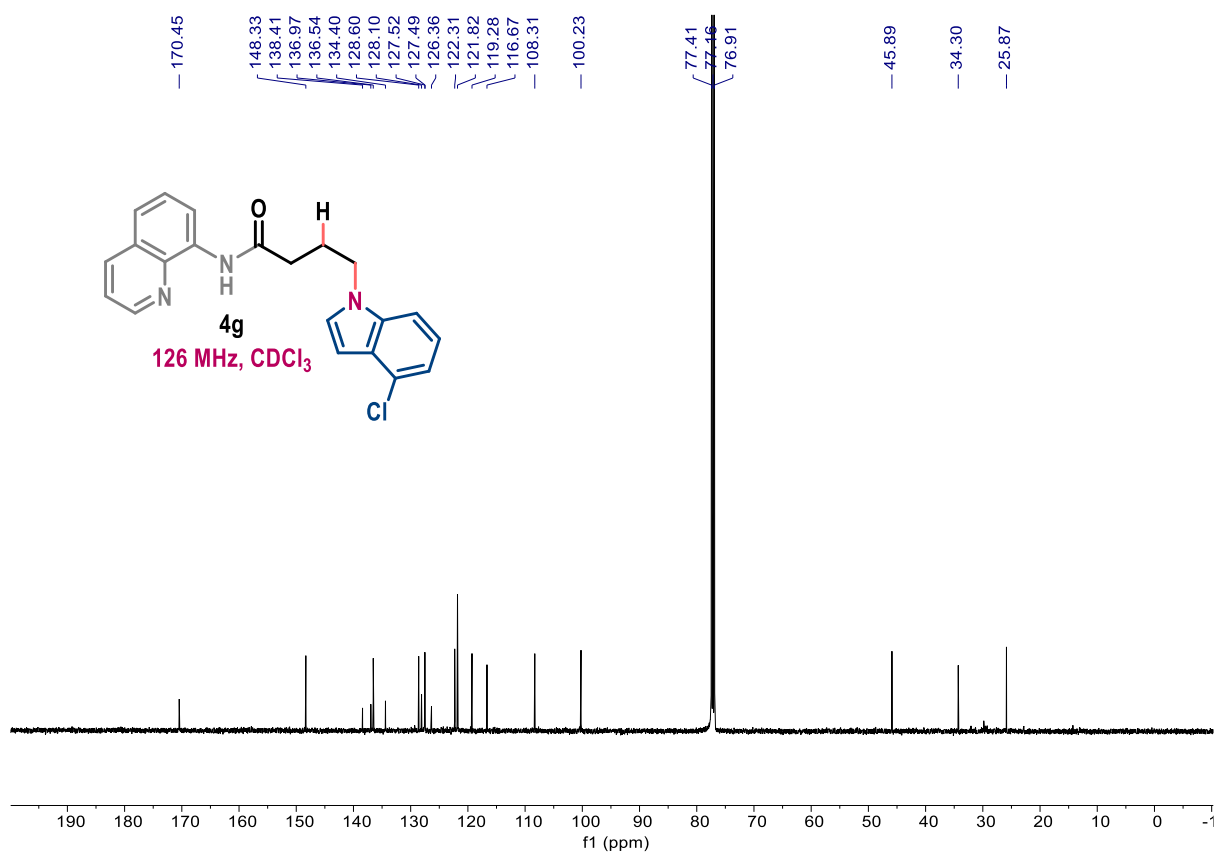

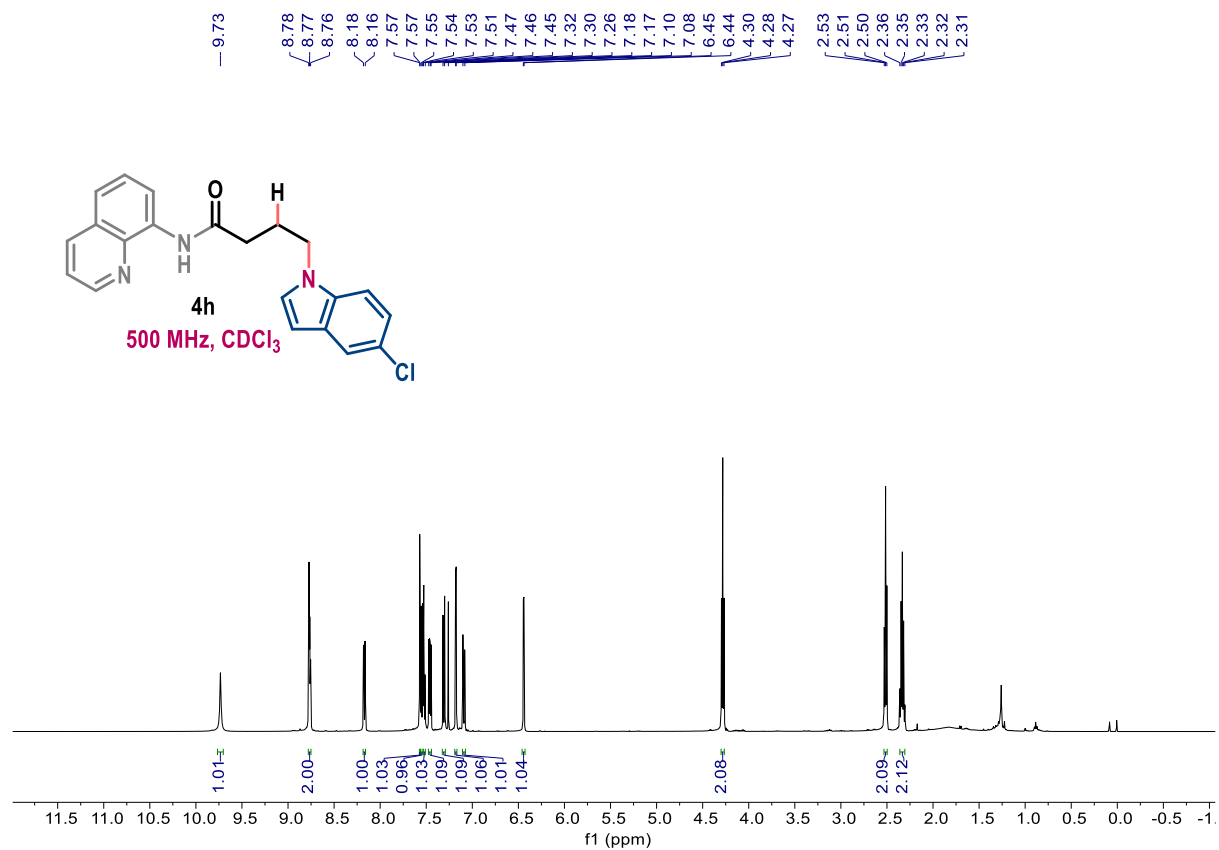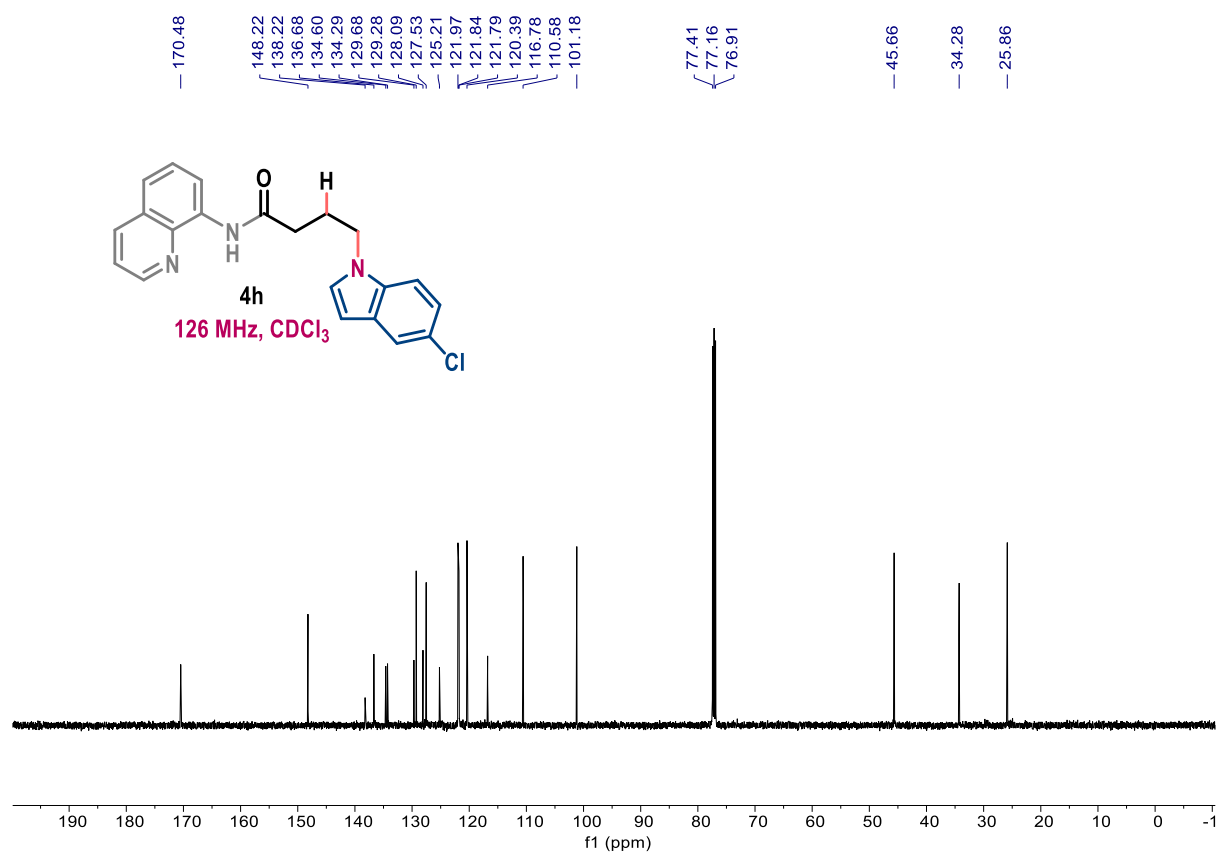

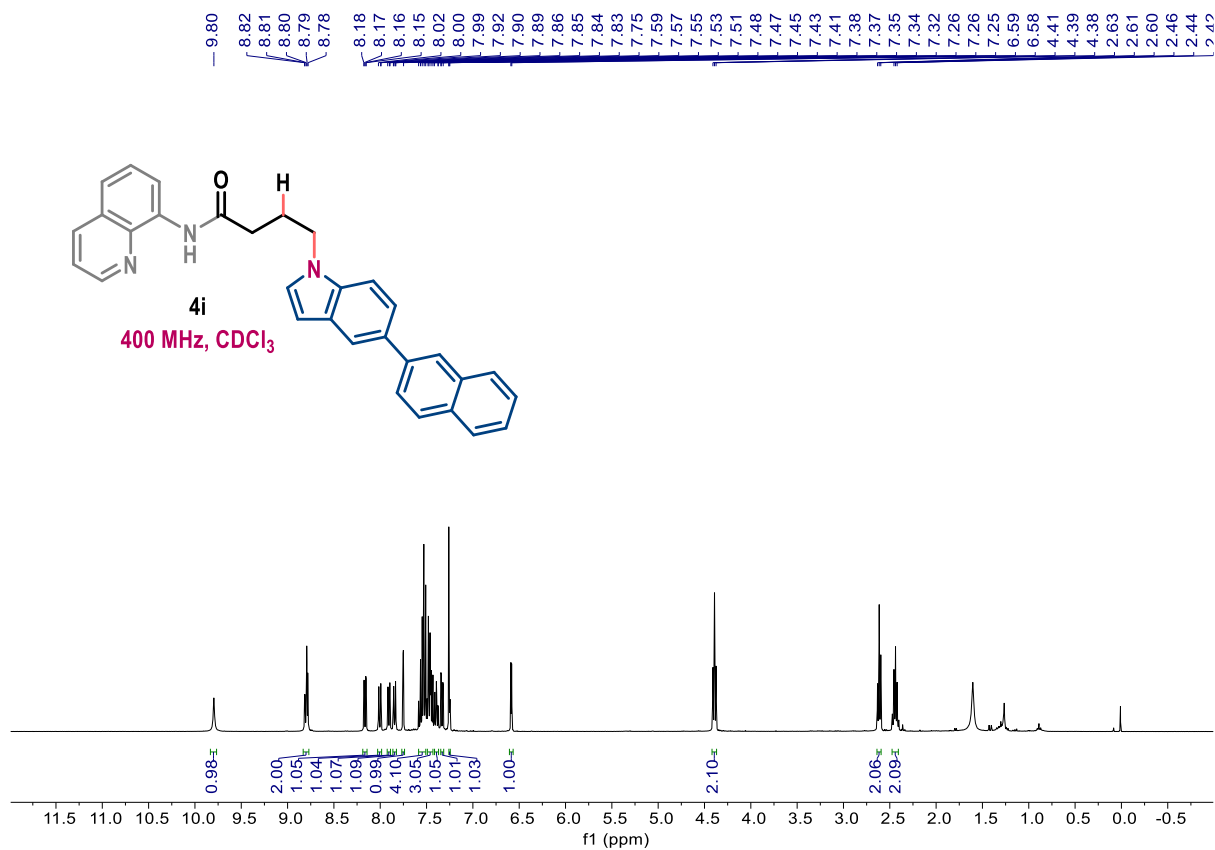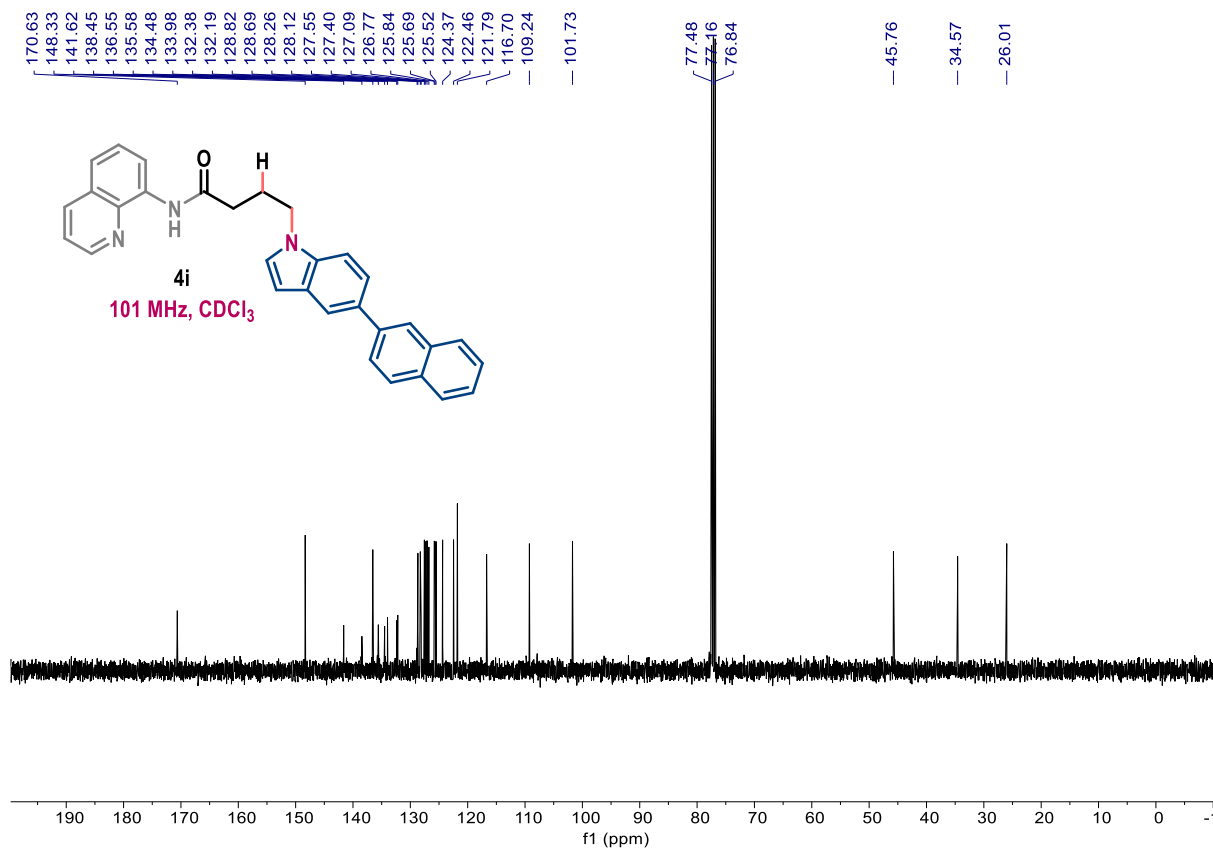

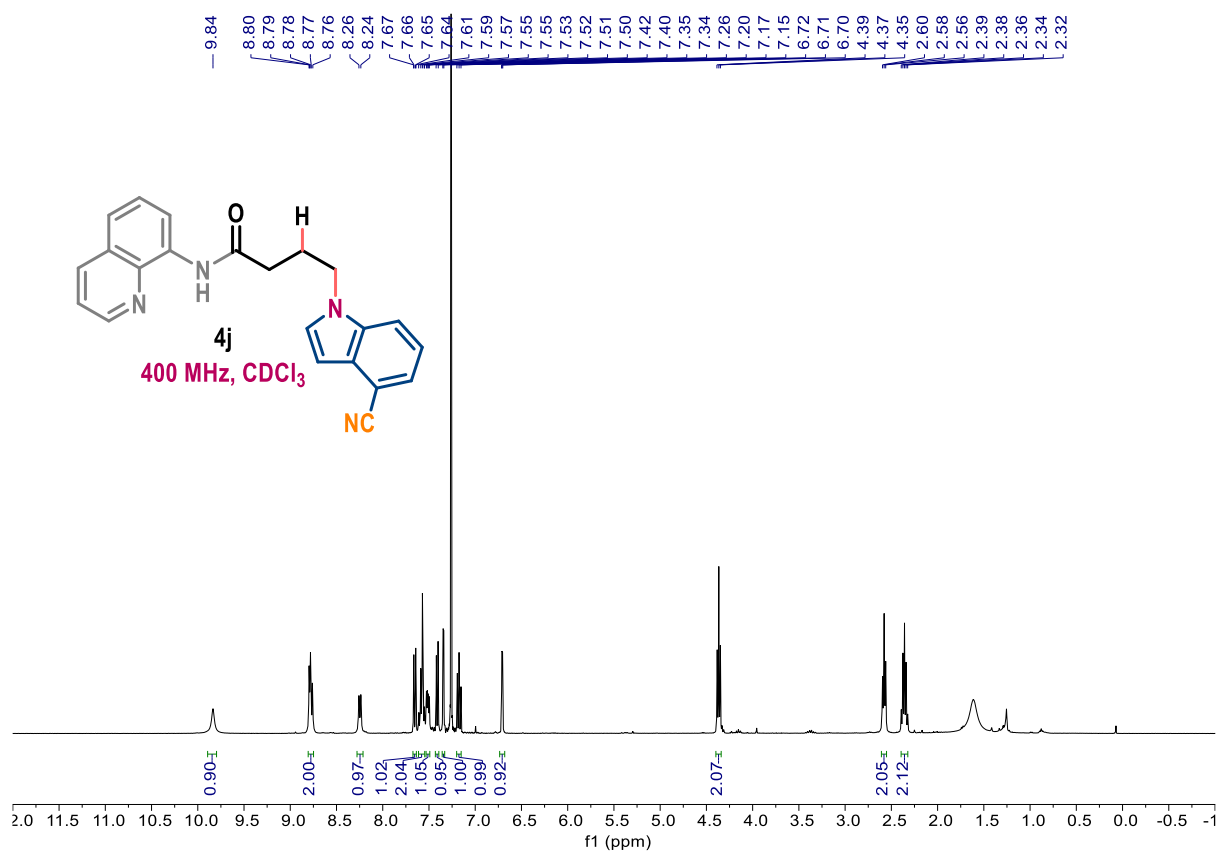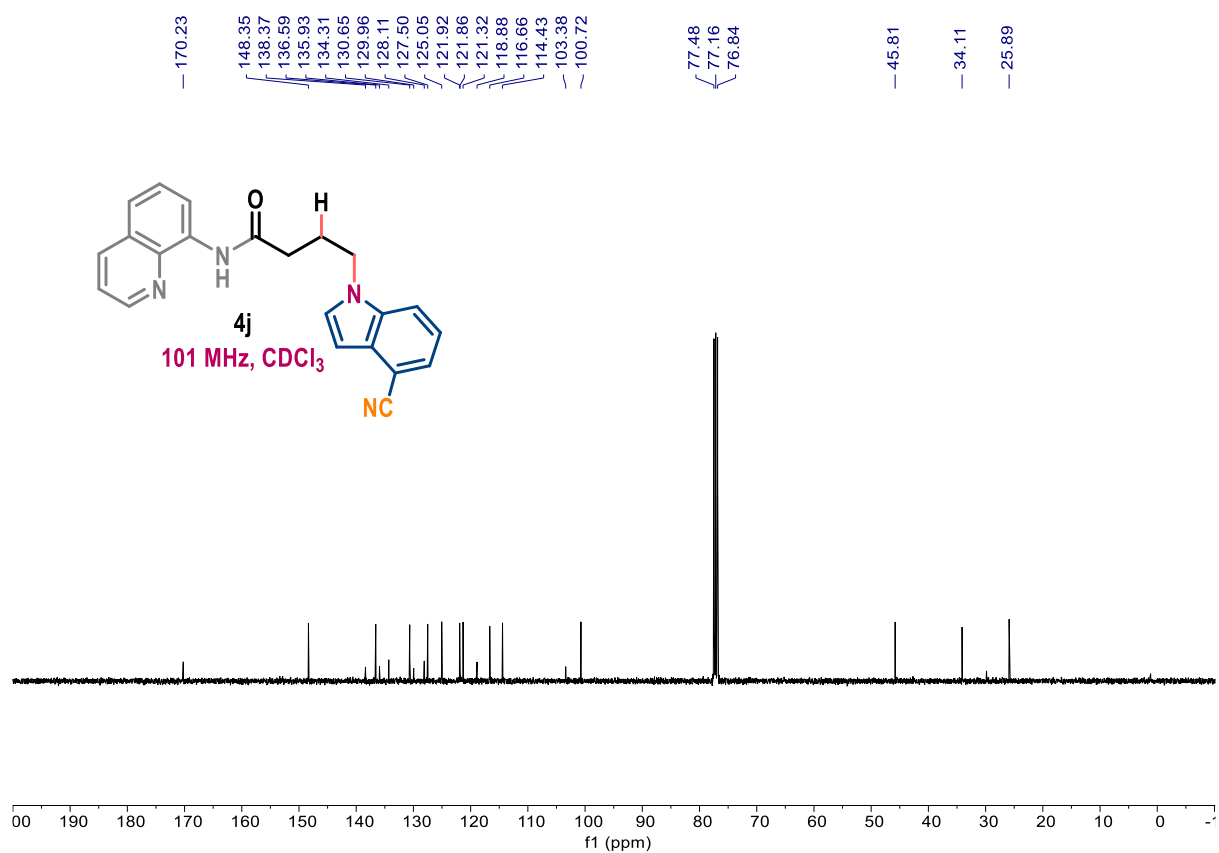

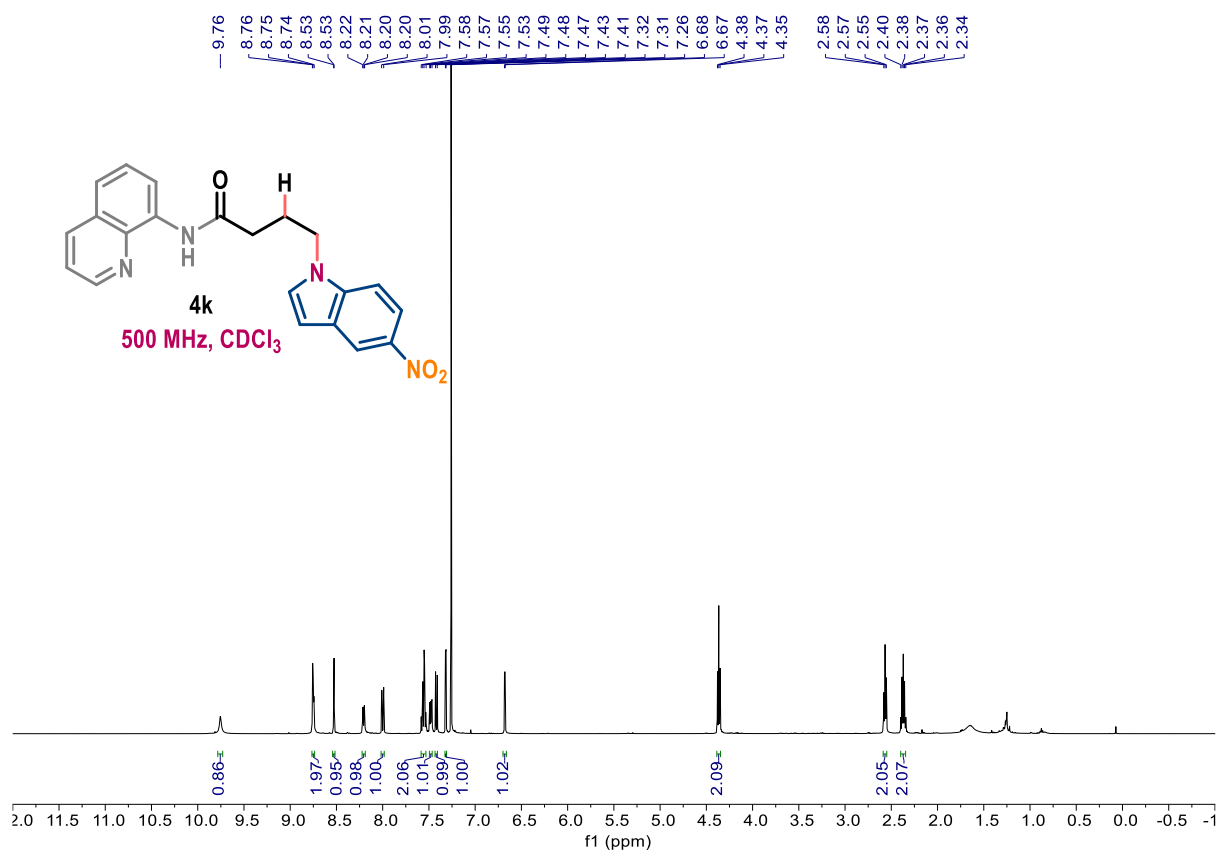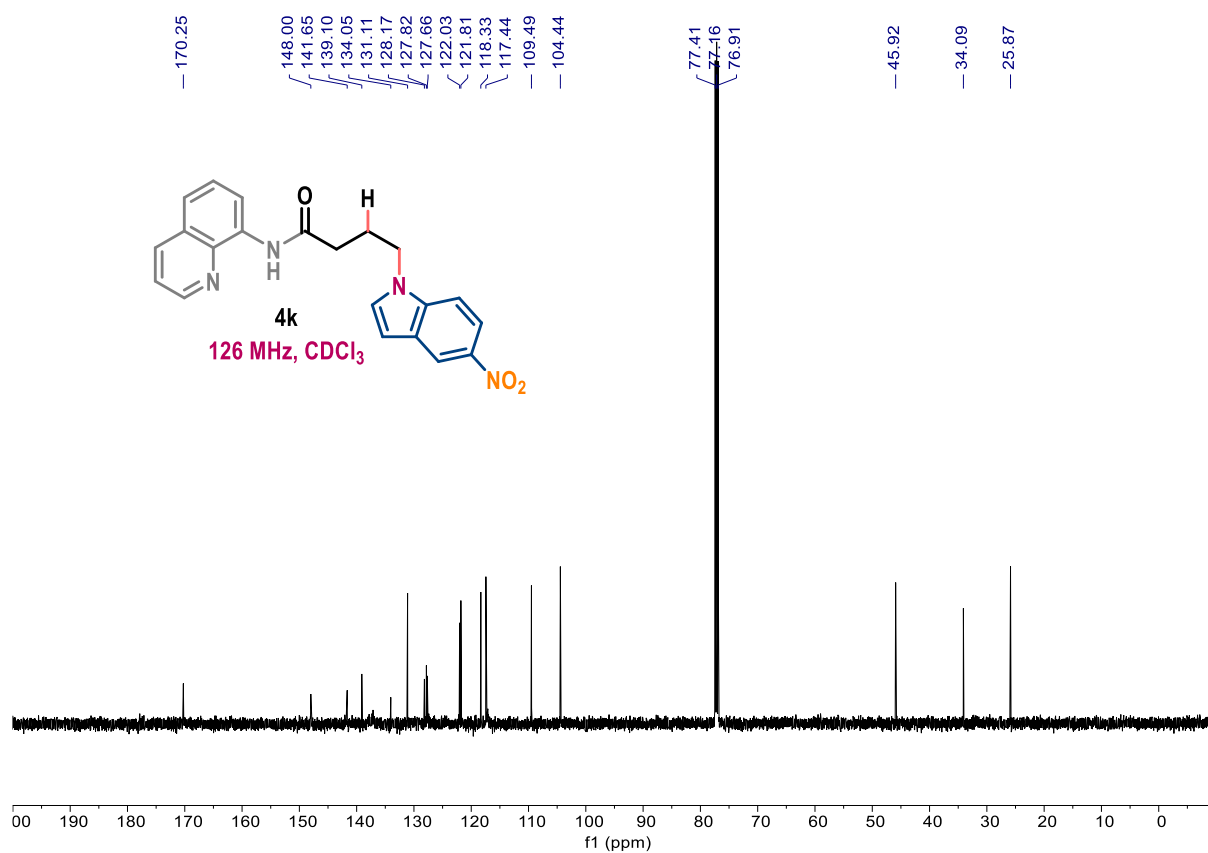

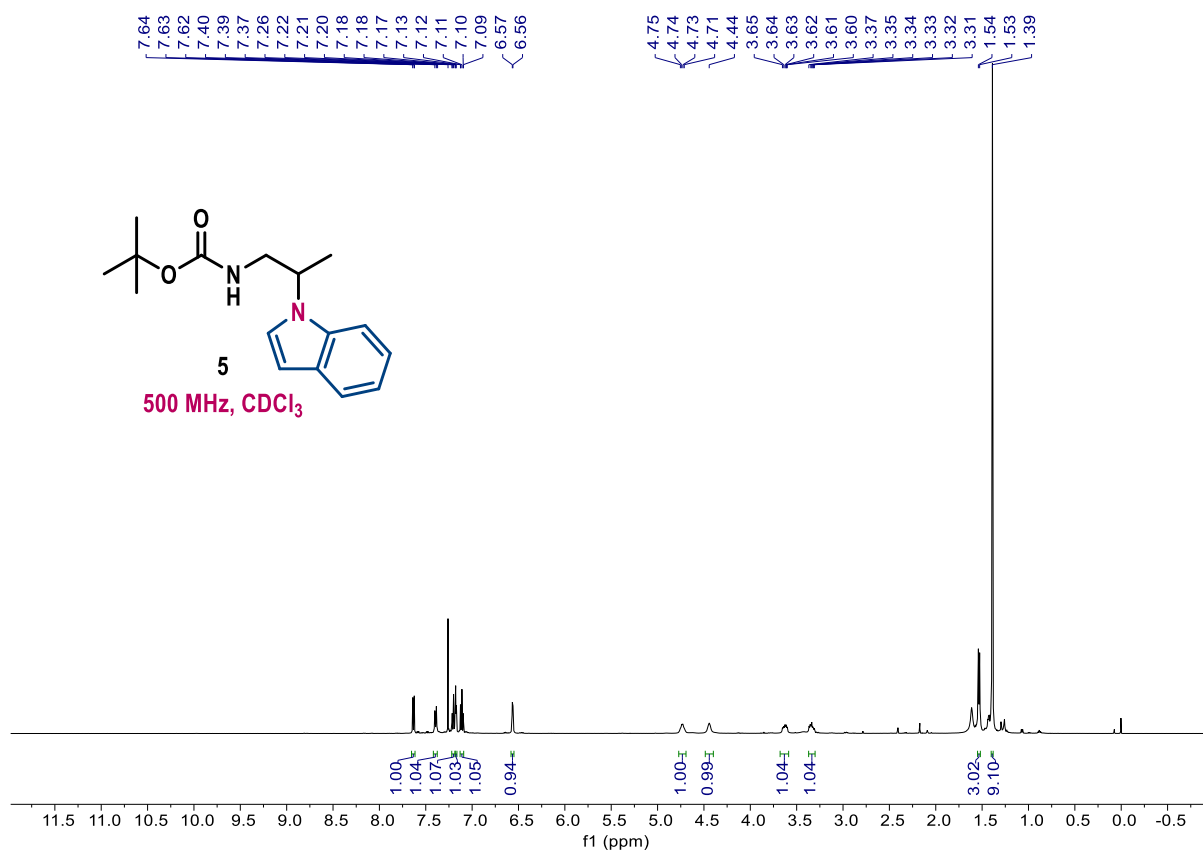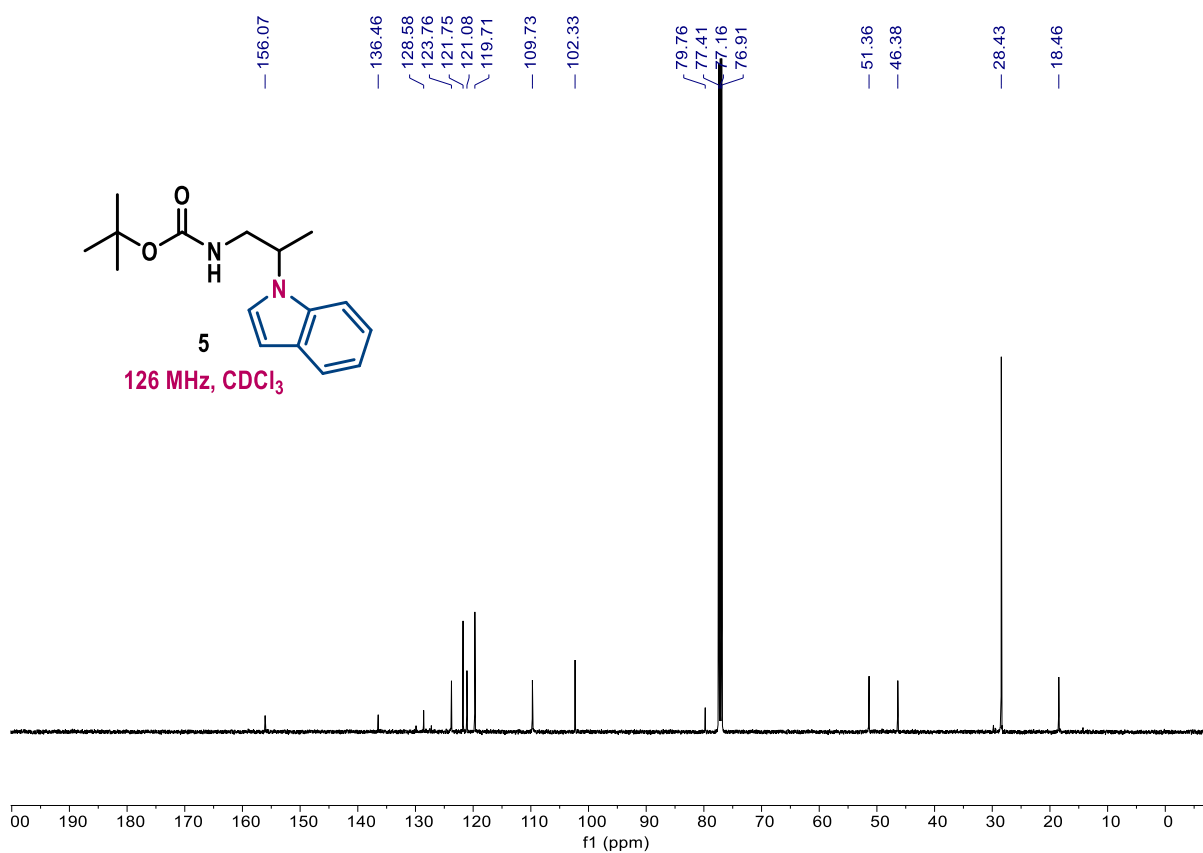

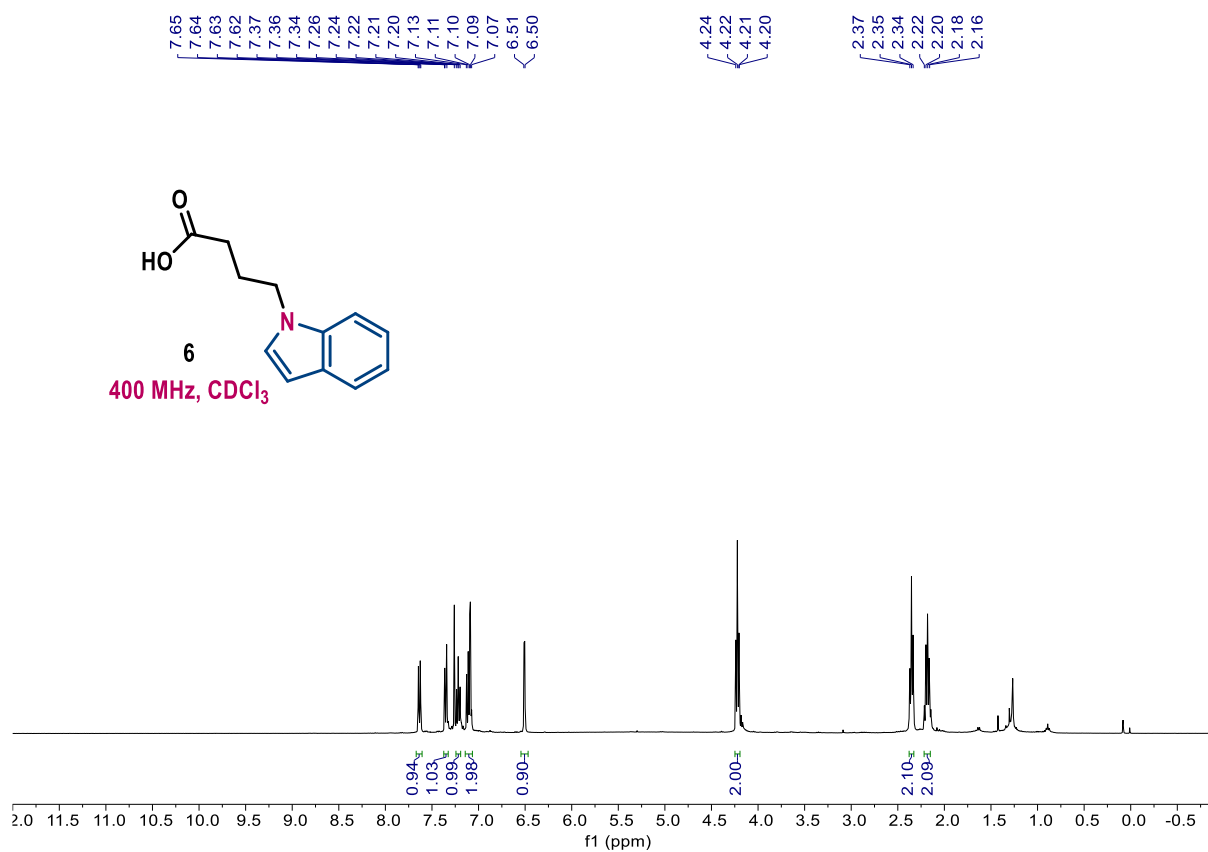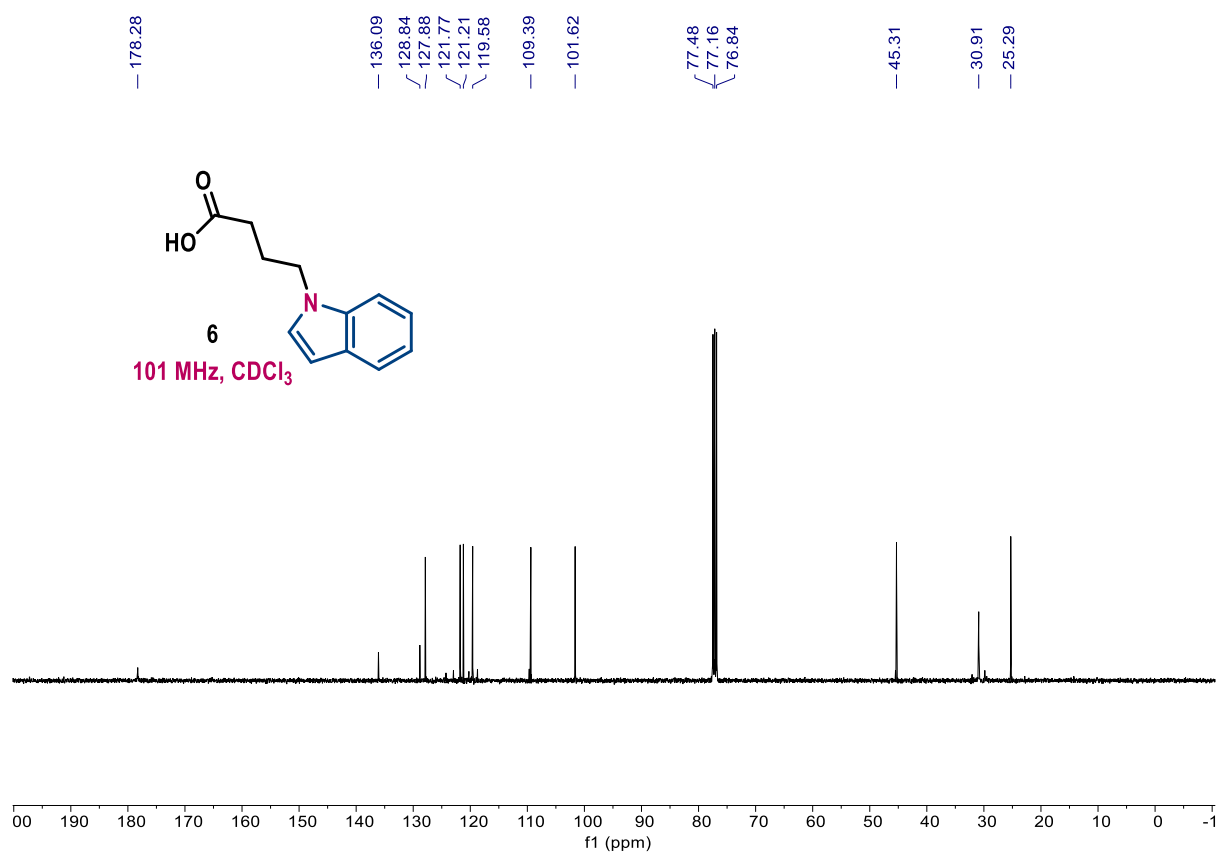

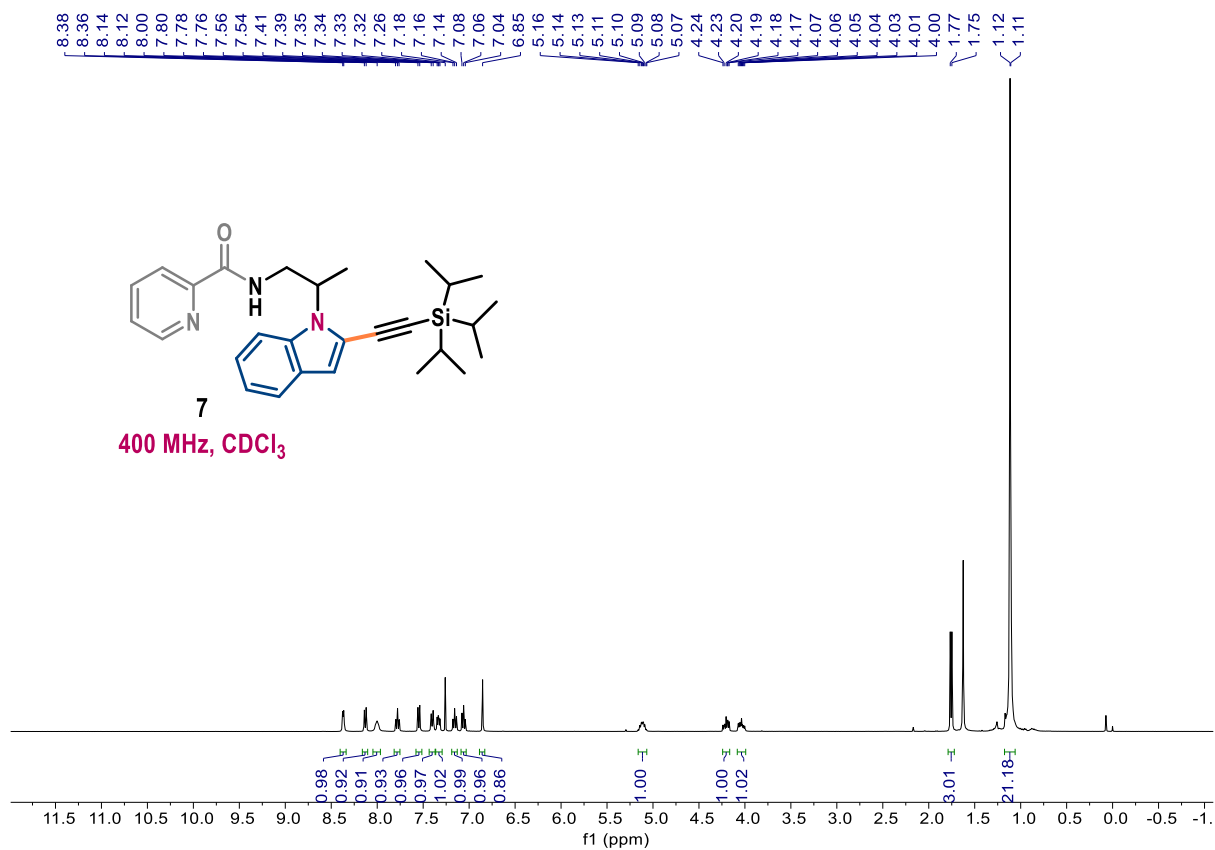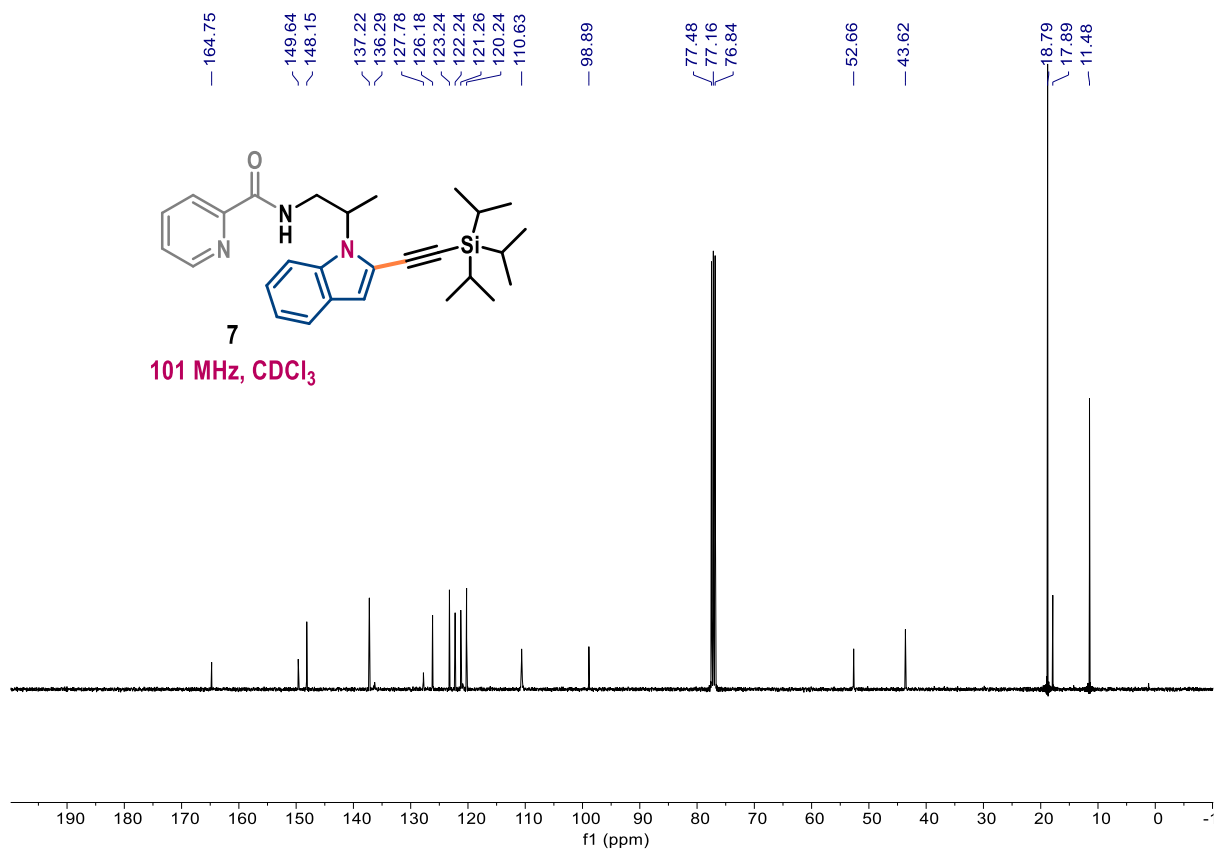



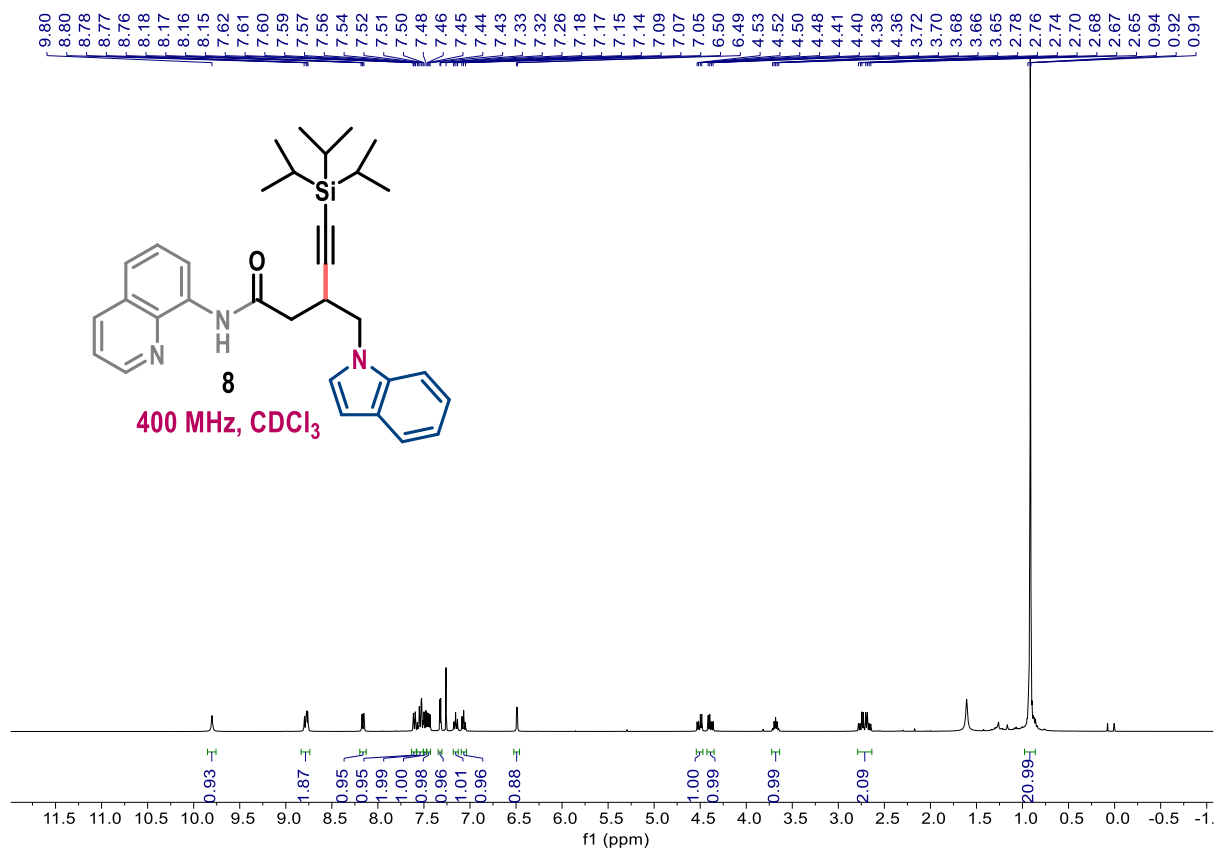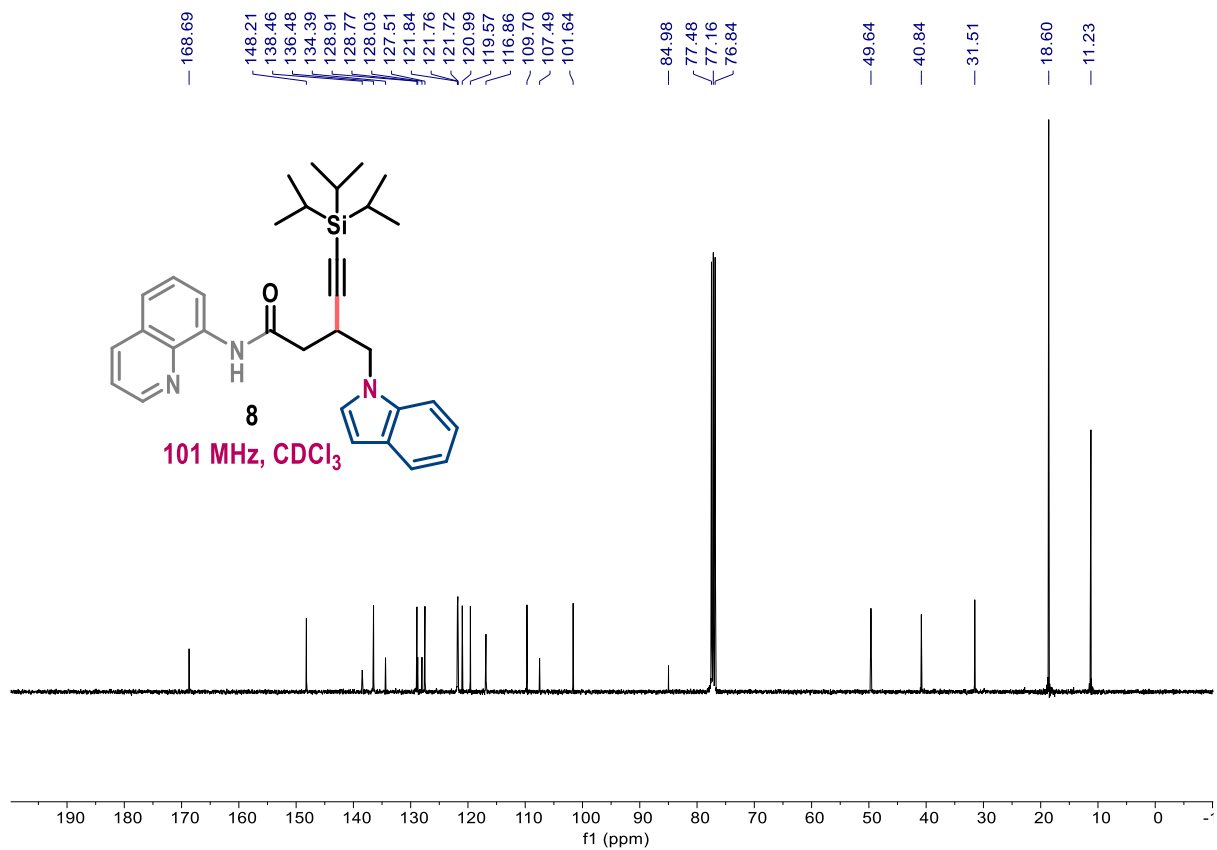

Supplement: d5cc06505d1.pdf [file d5cc06505d1.pdf]
